# Supplementary material for: Primary liver cancer in the UK: Incidence, incidence-based mortality, and survival by subtype, sex, and nation
Source: PubMed Central journal article supplement (PMC7966867; doi:10.1016/j.jhepr.2021.100232), 2021-01-19
Supplement: mmc1.pdf [file mmc1.pdf]

# Primary liver cancer in the UK: Incidence, incidence-based mortality, and survival by subtype, sex, and nation

Anya Burton, Daniela Tataru, Robert J. Driver, Thomas G. Bird, Dyfed Huws, David Wallace, Timothy J.S. Cross, Ian A. Rowe, Graeme Alexander, Aileen Marshall

|                          |    |
|--------------------------|----|
| Table of contents        |    |
| Subtype definitions..... | 2  |
| Table S1.....            | 3  |
| Table S2.....            | 4  |
| Table S3.....            | 6  |
| Table S4.....            | 8  |
| Table S5.....            | 10 |
| Table S6.....            | 12 |
| Table S7.....            | 16 |
| Table S8.....            | 20 |
| Fig. S1.....             | 24 |
| Fig. S2.....             | 25 |
| Fig. S3.....             | 26 |
| Fig. S4.....             | 27 |
| Fig. S5.....             | 28 |

## **1. Subtype definitions**

All ICD10 C22 (liver) tumours were selected. Subtype was defined primarily based on ICDO-2 morphology, and secondarily on ICD10 code as follows:

### **Hepatocellular carcinomas**

Hepatocellular Carcinoma ICDO morphology codes (8170-8175)

Or, non-specific malignant tumour morphology codes (8000, 8001, 8010) and liver cell carcinoma ICD10 site (C220)

Or, those with Combined Hepatocellular Carcinoma & Cholangiocarcinoma morphology code 8180

### **Intrahepatic Cholangiocarcinomas**

Cholangiocarcinoma ICDO morphology codes (8160 and 8161)

or adenocarcinoma NOS (8140) or non-specific malignant tumour morphology codes (8000, 8001, 8010) and Intrahepatic bile duct carcinoma ICD10 site code (C221)

### **Other**

All other patients with a C22 diagnosis

### **Exclusions**

Those coded as malignant in behaviour but with benign morphology codes  
Klatskin (8162)

Table S1 Subtype designation

| ICDO Morphology code |        |        |      |      |      |       |       |       | ICDO Morphology code |        |        |      |      |      |       |       |       | Row total | Summary |  |
|----------------------|--------|--------|------|------|------|-------|-------|-------|----------------------|--------|--------|------|------|------|-------|-------|-------|-----------|---------|--|
| C220                 | C221   | C222   | C223 | C224 | C227 | C229  | Total | C220  | C221                 | C222   | C223   | C224 | C227 | C229 | Total |       |       |           |         |  |
| 8000                 | 1,379  | 1,454  | 3    | 8    | 3    | 12    | 3,503 | 6362  | 8490                 | 0      | 3      | 0    | 0    | 0    | 3     | 0     | 6     | HCC:      | 41,463  |  |
| 8001                 | 18     | 8      | 0    | 0    | 0    | 0     | 13    | 39    | 8500                 | 0      | 8      | 0    | 0    | 0    | 8     | 0     | 16    | iCCA:     | 30,402  |  |
| 8002                 | 0      | 0      | 0    | 0    | 0    | 0     | 3     | 3     | 8503                 | 0      | 0      | 0    | 0    | 0    | 3     | 0     | 3     | Other     | 10156   |  |
| 8003                 | 0      | 0      | 0    | 0    | 0    | 0     | 3     | 3     | 8550                 | 3      | 0      | 0    | 0    | 0    | 0     | 0     | 3     | Excluded  | 3       |  |
| 8004                 | 0      | 0      | 0    | 0    | 0    | 0     | 3     | 3     | 8560                 | 0      | 3      | 0    | 0    | 0    | 8     | 3     | 14    |           |         |  |
| 8010                 | 477    | 546    | 0    | 3    | 3    | 635   | 2,419 | 4083  | 8576                 | 3      | 0      | 0    | 0    | 0    | 0     | 0     | 3     |           | 82,024  |  |
| 8011                 | 0      | 0      | 0    | 0    | 0    | 3     | 0     | 3     | 8680                 | 0      | 0      | 0    | 0    | 0    | 3     | 0     | 3     |           |         |  |
| 8012                 | 3      | 0      | 0    | 0    | 0    | 14    | 3     | 20    | 8800                 | 3      | 0      | 0    | 3    | 28   | 0     | 11    | 45    |           |         |  |
| 8020                 | 0      | 0      | 0    | 0    | 0    | 29    | 3     | 32    | 8801                 | 0      | 0      | 0    | 0    | 13   | 0     | 3     | 16    |           |         |  |
| 8021                 | 0      | 0      | 0    | 0    | 0    | 3     | 3     | 6     | 8802                 | 0      | 0      | 0    | 0    | 3    | 0     | 0     | 3     |           |         |  |
| 8022                 | 0      | 3      | 0    | 0    | 0    | 0     | 3     | 6     | 8803                 | 0      | 0      | 0    | 0    | 3    | 0     | 0     | 3     |           |         |  |
| 8031                 | 0      | 0      | 0    | 0    | 0    | 3     | 3     | 6     | 8810                 | 0      | 0      | 0    | 0    | 3    | 0     | 0     | 3     |           |         |  |
| 8032                 | 3      | 0      | 0    | 0    | 0    | 8     | 3     | 14    | 8815                 | 3      | 0      | 0    | 0    | 3    | 0     | 0     | 6     |           |         |  |
| 8033                 | 0      | 0      | 0    | 0    | 0    | 8     | 0     | 8     | 8830                 | 0      | 0      | 0    | 0    | 3    | 0     | 0     | 3     |           |         |  |
| 8041                 | 3      | 0      | 0    | 0    | 0    | 34    | 15    | 52    | 8840                 | 0      | 0      | 0    | 0    | 3    | 0     | 0     | 3     |           |         |  |
| 8046                 | 0      | 3      | 0    | 0    | 0    | 0     | 0     | 3     | 8850                 | 0      | 0      | 0    | 0    | 3    | 0     | 0     | 3     |           |         |  |
| 8050                 | 0      | 3      | 0    | 0    | 0    | 0     | 0     | 3     | 8853                 | 0      | 0      | 0    | 0    | 3    | 0     | 0     | 3     |           |         |  |
| 8060                 | 0      | 3      | 0    | 0    | 0    | 0     | 0     | 3     | 8858                 | 0      | 0      | 0    | 0    | 3    | 0     | 0     | 3     |           |         |  |
| 8070                 | 3      | 3      | 0    | 0    | 0    | 22    | 14    | 42    | 8890                 | 3      | 0      | 0    | 0    | 29   | 0     | 14    | 46    |           |         |  |
| 8071                 | 3      | 3      | 0    | 0    | 0    | 3     | 0     | 9     | 8891                 | 0      | 0      | 0    | 0    | 0    | 0     | 3     | 3     |           |         |  |
| 8140                 | 79     | 443    | 0    | 0    | 3    | 1,626 | 195   | 2346  | 8894                 | 0      | 0      | 0    | 0    | 3    | 0     | 3     | 6     |           |         |  |
| 8141                 | 0      | 0      | 0    | 0    | 0    | 3     | 0     | 3     | 8900                 | 0      | 0      | 0    | 0    | 3    | 0     | 3     | 6     |           |         |  |
| 8160                 | 210    | 27,500 | 0    | 0    | 0    | 8     | 222   | 27940 | 8901                 | 0      | 0      | 0    | 0    | 3    | 0     | 0     | 3     |           |         |  |
| 8161                 | 0      | 3      | 0    | 0    | 0    | 8     | 0     | 11    | 8910                 | 0      | 0      | 0    | 0    | 8    | 0     | 3     | 11    |           |         |  |
| 8170                 | 38,792 | 74     | 3    | 3    | 0    | 8     | 206   | 39086 | 8920                 | 0      | 0      | 0    | 0    | 3    | 0     | 0     | 3     |           |         |  |
| 8171                 | 178    | 3      | 0    | 0    | 0    | 0     | 3     | 184   | 8933                 | 0      | 0      | 0    | 0    | 3    | 0     | 0     | 3     |           |         |  |
| 8172                 | 3      | 0      | 0    | 0    | 0    | 0     | 0     | 3     | 8963                 | 0      | 0      | 0    | 0    | 15   | 0     | 0     | 15    |           |         |  |
| 8173                 | 3      | 0      | 0    | 0    | 0    | 0     | 0     | 3     | 8970                 | 11     | 0      | 378  | 0    | 3    | 0     | 0     | 392   |           |         |  |
| 8174                 | 3      | 0      | 0    | 0    | 0    | 3     | 0     | 6     | 8980                 | 3      | 0      | 0    | 0    | 3    | 0     | 3     | 9     |           |         |  |
| 8175                 | 3      | 0      | 0    | 0    | 0    | 0     | 0     | 3     | 8990                 | 0      | 0      | 0    | 3    | 3    | 0     | 3     | 9     |           |         |  |
| 8180                 | 275    | 31     | 0    | 0    | 0    | 3     | 8     | 317   | 8991                 | 3      | 0      | 0    | 0    | 36   | 0     | 0     | 39    |           |         |  |
| 8190                 | 3      | 0      | 0    | 0    | 0    | 3     | 3     | 9     | 9071                 | 3      | 0      | 0    | 0    | 0    | 0     | 8     | 11    |           |         |  |
| 8211                 | 0      | 0      | 0    | 0    | 0    | 0     | 3     | 3     | 9080                 | 0      | 0      | 0    | 0    | 0    | 3     | 3     | 6     |           |         |  |
| 8240                 | 8      | 3      | 0    | 0    | 0    | 153   | 44    | 208   | 9120                 | 3      | 3      | 0    | 165  | 0    | 0     | 3     | 174   |           |         |  |
| 8241                 | 0      | 0      | 0    | 0    | 0    | 3     | 0     | 3     | 9124                 | 0      | 0      | 0    | 8    | 0    | 0     | 0     | 8     |           |         |  |
| 8246                 | 8      | 3      | 3    | 0    | 0    | 183   | 52    | 249   | 9130                 | 0      | 0      | 0    | 8    | 3    | 0     | 3     | 14    |           |         |  |
| 8260                 | 0      | 8      | 0    | 0    | 0    | 3     | 0     | 11    | 9131                 | 0      | 0      | 0    | 0    | 3    | 0     | 0     | 3     |           |         |  |
| 8263                 | 0      | 0      | 0    | 0    | 0    | 0     | 3     | 3     | 9133                 | 8      | 0      | 0    | 34   | 3    | 3     | 3     | 51    |           |         |  |
| 8310                 | 3      | 3      | 0    | 0    | 0    | 8     | 3     | 17    | 9150                 | 0      | 0      | 0    | 0    | 0    | 3     | 0     | 3     |           |         |  |
| 8430                 | 0      | 0      | 0    | 0    | 0    | 0     | 3     | 3     | 9170                 | 3      | 0      | 0    | 0    | 0    | 0     | 0     | 3     |           |         |  |
| 8440                 | 3      | 0      | 0    | 0    | 0    | 0     | 3     | 6     | 9364                 | 0      | 0      | 0    | 0    | 0    | 0     | 3     | 3     |           |         |  |
| 8453                 | 0      | 3      | 0    | 0    | 0    | 0     | 0     | 3     | 9370                 | 0      | 0      | 0    | 0    | 0    | 0     | 3     | 3     |           |         |  |
| 8470                 | 0      | 0      | 0    | 0    | 0    | 3     | 0     | 3     | 9540                 | 0      | 0      | 0    | 0    | 0    | 0     | 3     | 3     |           |         |  |
| 8480                 | 3      | 8      | 0    | 0    | 0    | 24    | 3     | 38    |                      |        |        |      |      |      |       |       |       |           |         |  |
| 8481                 | 3      | 12     | 0    | 0    | 0    | 11    | 3     | 29    | Column total         | 41,515 | 30,137 | 387  | 235  | 198  | 2,858 | 6,823 | 82153 |           |         |  |

Small counts have been suppressed as follows 1 to ≤5 as 3 and 6 to ≤10 as 8, therefore row and column totals are representations only.

Table S2 Primary liver cancer incidence and incidence-based mortality rates, by nation, sex, subtype and year

| Year    | INCIDENCE       |       |               |                 |       |               |                 |       |               |                 |       |               |                  |       |              |
|---------|-----------------|-------|---------------|-----------------|-------|---------------|-----------------|-------|---------------|-----------------|-------|---------------|------------------|-------|--------------|
|         | UK              |       |               | England         |       |               | Scotland        |       |               | Wales           |       |               | Northern Ireland |       |              |
|         | Number of Cases | ASR   | 95% CI        | Number of Cases | ASR   | 95% CI        | Number of Cases | ASR   | 95% CI        | Number of Cases | ASR   | 95% CI        | Number of Cases  | ASR   | 95% CI       |
| Persons |                 |       |               |                 |       |               |                 |       |               |                 |       |               |                  |       |              |
| 1997    | 2126            | 4.41  | (4.22-4.6)    | 1697            | 4.21  | (4.01-4.42)   | 245             | 5.83  | (5.12-6.61)   | 126             | 4.84  | (4.03-5.77)   | 58               | 5.04  | (3.83-6.52)  |
| 1998    | 2178            | 4.5   | (4.31-4.69)   | 1740            | 4.29  | (4.09-4.5)    | 261             | 6.44  | (5.68-7.28)   | 131             | 5.01  | (4.19-5.95)   | 46               | 3.79  | (2.77-5.07)  |
| 1999    | 2273            | 4.64  | (4.45-4.84)   | 1832            | 4.47  | (4.27-4.68)   | 248             | 5.91  | (5.19-6.69)   | 147             | 5.6   | (4.73-6.59)   | 46               | 3.92  | (2.86-5.25)  |
| 2000    | 2526            | 5.14  | (4.94-5.34)   | 2067            | 5.02  | (4.81-5.25)   | 261             | 6.14  | (5.41-6.93)   | 136             | 5.24  | (4.39-6.2)    | 62               | 5.12  | (3.92-6.56)  |
| 2001    | 2487            | 4.99  | (4.8-5.2)     | 2061            | 4.95  | (4.73-5.17)   | 258             | 6.03  | (5.32-6.82)   | 143             | 5.4   | (4.55-6.37)   | 25               | 2.04  | (1.31-3.03)  |
| 2002    | 2684            | 5.36  | (5.16-5.57)   | 2214            | 5.29  | (5.07-5.51)   | 255             | 5.86  | (5.16-6.63)   | 149             | 5.61  | (4.74-6.6)    | 66               | 5.43  | (4.18-6.94)  |
| 2003    | 2692            | 5.33  | (5.13-5.54)   | 2183            | 5.16  | (4.95-5.39)   | 296             | 6.9   | (6.13-7.74)   | 160             | 5.87  | (4.99-6.86)   | 53               | 4.27  | (3.19-5.6)   |
| 2004    | 2864            | 5.61  | (5.41-5.82)   | 2318            | 5.44  | (5.22-5.66)   | 327             | 7.51  | (6.71-8.37)   | 170             | 6.13  | (5.24-7.13)   | 49               | 3.88  | (2.86-5.14)  |
| 2005    | 3124            | 6.07  | (5.86-6.29)   | 2565            | 5.96  | (5.73-6.19)   | 329             | 7.46  | (6.67-8.32)   | 163             | 5.94  | (5.06-6.93)   | 67               | 5.31  | (4.11-6.76)  |
| 2006    | 3439            | 6.63  | (6.41-6.86)   | 2806            | 6.47  | (6.23-6.71)   | 365             | 8.19  | (7.36-9.08)   | 185             | 6.73  | (5.79-7.78)   | 83               | 6.49  | (5.15-8.05)  |
| 2007    | 3670            | 6.95  | (6.72-7.18)   | 2968            | 6.73  | (6.49-6.98)   | 403             | 8.84  | (7.99-9.75)   | 218             | 7.65  | (6.66-8.74)   | 81               | 6.04  | (4.78-7.52)  |
| 2008    | 3810            | 7.13  | (6.9-7.36)    | 3117            | 6.98  | (6.73-7.23)   | 370             | 7.94  | (7.14-8.79)   | 246             | 8.7   | (7.64-9.87)   | 77               | 5.68  | (4.48-7.12)  |
| 2009    | 4197            | 7.75  | (7.52-7.99)   | 3494            | 7.72  | (7.47-7.98)   | 395             | 8.42  | (7.61-9.3)    | 223             | 7.79  | (6.8-8.89)    | 85               | 6.2   | (4.94-7.67)  |
| 2010    | 4442            | 8.06  | (7.82-8.3)    | 3733            | 8.11  | (7.85-8.38)   | 417             | 8.71  | (7.89-9.59)   | 199             | 6.8   | (5.89-7.82)   | 93               | 6.43  | (5.17-7.89)  |
| 2011    | 4669            | 8.37  | (8.14-8.62)   | 3803            | 8.16  | (7.9-8.42)    | 474             | 9.9   | (9.03-10.84)  | 280             | 9.49  | (8.4-10.67)   | 112              | 7.99  | (6.57-9.63)  |
| 2012    | 5131            | 9.05  | (8.8-9.3)     | 4197            | 8.86  | (8.59-9.13)   | 539             | 11.06 | (10.14-12.03) | 287             | 9.56  | (8.48-10.74)  | 108              | 7.3   | (5.98-8.82)  |
| 2013    | 5759            | 9.97  | (9.72-10.24)  | 4691            | 9.72  | (9.45-10.01)  | 622             | 12.52 | (11.55-13.54) | 322             | 10.49 | (9.37-11.71)  | 124              | 8.49  | (7.05-10.1)  |
| 2014    | 5839            | 9.9   | (9.65-10.16)  | 4801            | 9.73  | (9.45-10.01)  | 623             | 12.34 | (11.39-13.35) | 280             | 9.02  | (7.99-10.15)  | 135              | 9.01  | (7.55-10.6)  |
| 2015    | 6006            | 10.05 | (9.8-10.31)   | 4865            | 9.74  | (9.46-10.02)  | 649             | 12.66 | (11.7-13.68)  | 353             | 11.19 | (10.05-12.42) | 139              | 9.11  | (7.65-10.7)  |
| 2016    | 6143            | 10.11 | (9.86-10.37)  | 5094            | 10.03 | (9.75-10.31)  | 618             | 11.85 | (10.93-12.82) | 296             | 9.32  | (8.29-10.45)  | 135              | 8.68  | (7.27-10.2)  |
| 2017    | 5965            | 9.64  | (9.4-9.89)    | 4931            | 9.53  | (9.26-9.8)    | 617             | 11.71 | (10.8-12.68)  | 288             | 8.89  | (7.89-9.99)   | 129              | 8.08  | (6.74-9.61)  |
| Men     |                 |       |               |                 |       |               |                 |       |               |                 |       |               |                  |       |              |
| 1997    | 1259            | 6.06  | (5.72-6.41)   | 998             | 5.74  | (5.38-6.12)   | 157             | 8.56  | (7.24-10.04)  | 73              | 6.74  | (5.23-8.55)   | 31               | 6.38  | (4.31-9.09)  |
| 1998    | 1310            | 6.31  | (5.96-6.67)   | 1047            | 5.95  | (5.58-6.33)   | 159             | 10.12 | (8.43-12.02)  | 78              | 6.96  | (5.45-8.75)   | 26               | 4.86  | (3.11-7.21)  |
| 1999    | 1397            | 6.69  | (6.33-7.06)   | 1136            | 6.47  | (6.09-6.88)   | 152             | 8.64  | (7.26-10.19)  | 89              | 8.42  | (6.68-10.45)  | 20               | 3.58  | (2.12-5.63)  |
| 2000    | 1556            | 7.31  | (6.94-7.69)   | 1298            | 7.22  | (6.83-7.64)   | 151             | 8.62  | (7.24-10.18)  | 74              | 7.15  | (5.5-9.11)    | 33               | 6.15  | (4.2-8.68)   |
| 2001    | 1494            | 7.01  | (6.65-7.39)   | 1240            | 6.94  | (6.54-7.35)   | 157             | 8.56  | (7.24-10.05)  | 80              | 7.33  | (5.71-9.25)   | 17               | 3.63  | (1.92-6.09)  |
| 2002    | 1668            | 7.77  | (7.39-8.17)   | 1373            | 7.64  | (7.23-8.07)   | 165             | 8.73  | (7.42-10.21)  | 89              | 8.21  | (6.49-10.22)  | 41               | 8.08  | (5.64-11.1)  |
| 2003    | 1696            | 7.76  | (7.38-8.15)   | 1374            | 7.48  | (7.08-7.9)    | 186             | 10.39 | (8.89-12.06)  | 102             | 8.67  | (7.02-10.59)  | 34               | 6.27  | (4.3-8.83)   |
| 2004    | 1762            | 7.89  | (7.52-8.28)   | 1428            | 7.64  | (7.24-8.06)   | 205             | 11.18 | (9.65-12.88)  | 98              | 7.81  | (6.32-9.53)   | 31               | 5.73  | (3.84-8.21)  |
| 2005    | 1956            | 8.63  | (8.24-9.03)   | 1613            | 8.49  | (8.07-8.92)   | 210             | 10.88 | (9.41-12.51)  | 89              | 7.5   | (5.98-9.28)   | 44               | 7.97  | (5.75-10.7)  |
| 2006    | 2184            | 9.64  | (9.23-10.06)  | 1777            | 9.33  | (8.89-9.78)   | 241             | 12.78 | (11.16-14.57) | 113             | 9.58  | (7.83-11.58)  | 53               | 9.56  | (7.06-12.6)  |
| 2007    | 2320            | 9.9   | (9.49-10.32)  | 1860            | 9.49  | (9.05-9.94)   | 276             | 14.08 | (12.4-15.92)  | 131             | 10.33 | (8.61-12.29)  | 53               | 8.88  | (6.59-11.6)  |
| 2008    | 2441            | 10.27 | (9.86-10.7)   | 1996            | 10.06 | (9.61-10.52)  | 246             | 12.01 | (10.53-13.65) | 149             | 11.66 | (9.83-13.73)  | 50               | 7.98  | (5.9-10.56)  |
| 2009    | 2657            | 11.01 | (10.58-11.44) | 2172            | 10.75 | (10.3-11.23)  | 278             | 13.39 | (11.84-15.1)  | 146             | 11.45 | (9.62-13.51)  | 61               | 10.38 | (7.84-13.4)  |
| 2010    | 2811            | 11.37 | (10.95-11.81) | 2346            | 11.36 | (10.9-11.84)  | 287             | 13.51 | (11.96-15.21) | 119             | 8.92  | (7.37-10.7)   | 59               | 9.29  | (6.98-12.1)  |
| 2011    | 2978            | 11.88 | (11.45-12.32) | 2402            | 11.43 | (10.97-11.9)  | 323             | 15.23 | (13.56-17.03) | 179             | 13.5  | (11.55-15.65) | 74               | 12.11 | (9.44-15.2)  |
| 2012    | 3322            | 12.92 | (12.48-13.38) | 2684            | 12.48 | (12-12.96)    | 360             | 16.44 | (14.75-18.25) | 191             | 14.24 | (12.26-16.45) | 87               | 12.88 | (10.28-15.9) |
| 2013    | 3744            | 14.39 | (13.93-14.87) | 3017            | 13.85 | (13.36-14.36) | 440             | 20.09 | (18.21-22.11) | 205             | 14.33 | (12.42-16.44) | 82               | 13.35 | (10.5-16.7)  |
| 2014    | 3841            | 14.36 | (13.91-14.83) | 3134            | 13.99 | (13.5-14.5)   | 425             | 18.96 | (17.16-20.89) | 196             | 13.7  | (11.83-15.77) | 86               | 12.86 | (10.22-15.9) |
| 2015    | 3879            | 14.19 | (13.75-14.65) | 3116            | 13.63 | (13.15-14.12) | 437             | 19.05 | (17.27-20.97) | 244             | 16.62 | (14.57-18.86) | 82               | 11.76 | (9.33-14.6)  |
| 2016    | 4055            | 14.6  | (14.15-15.06) | 3342            | 14.37 | (13.88-14.87) | 421             | 18.03 | (16.32-19.87) | 208             | 14.18 | (12.3-16.26)  | 84               | 11.61 | (9.22-14.4)  |
| 2017    | 3928            | 13.85 | (13.42-14.29) | 3232            | 13.61 | (13.14-14.09) | 423             | 17.81 | (16.13-19.62) | 184             | 12.21 | (10.5-14.13)  | 89               | 11.98 | (9.6-14.76)  |
| Women   |                 |       |               |                 |       |               |                 |       |               |                 |       |               |                  |       |              |
| 1997    | 867             | 3.1   | (2.9-3.31)    | 699             | 2.99  | (2.77-3.22)   | 88              | 3.61  | (2.9-4.46)    | 53              | 3.58  | (2.68-4.69)   | 27               | 3.84  | (2.53-5.6)   |
| 1998    | 868             | 3.09  | (2.89-3.31)   | 693             | 2.96  | (2.74-3.19)   | 102             | 4.16  | (3.39-5.06)   | 53              | 3.52  | (2.63-4.62)   | 20               | 3.03  | (1.85-4.67)  |
| 1999    | 876             | 3.12  | (2.92-3.34)   | 696             | 2.97  | (2.75-3.2)    | 96              | 3.95  | (3.19-4.82)   | 58              | 3.88  | (2.94-5.02)   | 26               | 3.88  | (2.53-5.69)  |
| 2000    | 970             | 3.42  | (3.21-3.65)   | 769             | 3.25  | (3.02-3.49)   | 110             | 4.43  | (3.64-5.35)   | 62              | 3.99  | (3.05-5.13)   | 29               | 4.27  | (2.85-6.13)  |
| 2001    | 993             | 3.48  | (3.27-3.71)   | 821             | 3.44  | (3.21-3.68)   | 101             | 4.12  | (3.35-5)      | 63              | 4.16  | (3.18-5.33)   | 8                | 1.16  | (0.5-2.29)   |
| 2002    | 1016            | 3.52  | (3.3-3.74)    | 841             | 3.48  | (3.25-3.72)   | 90              | 3.55  | (2.85-4.36)   | 60              | 3.99  | (3.04-5.15)   | 25               | 3.61  | (2.32-5.34)  |
| 2003    | 996             | 3.44  | (3.23-3.66)   | 809             | 3.33  | (3.1-3.57)    | 110             | 4.45  | (3.66-5.37)   | 58              | 3.77  | (2.86-4.89)   | 19               | 2.64  | (1.58-4.14)  |
| 2004    | 1102            | 3.79  | (3.57-4.02)   | 890             | 3.66  | (3.42-3.91)   | 122             | 4.82  | (4-5.77)      | 72              | 4.64  | (3.62-5.85)   | 18               | 2.54  | (1.5-4.03)   |
| 2005    | 1168            | 4     | (3.77-4.24)   | 952             | 3.89  | (3.65-4.15)   | 119             | 4.69  | (3.88-5.62)   | 74              | 4.84  | (3.79-6.08)   | 23               | 3.24  | (2.04-4.87)  |
| 2006    | 1255            | 4.29  | (4.06-4.54)   | 1029            | 4.22  | (3.96-4.49)   | 124             | 4.82  | (4.01-5.75)   | 72              | 4.75  | (3.71-5.99)   | 30               | 4.04  | (2.72-5.78)  |
| 2007    | 1350            | 4.54  | (4.3-4.79)    | 1108            | 4.47  | (4.2-4.74)    | 127             | 4.94  | (4.11-5.88)   | 87              | 5.35  | (4.27-6.61)   | 28               | 3.73  | (2.47-5.4)   |
| 2008    | 1369            | 4.55  | (4.31-4.8)    | 1121            | 4.45  | (4.19-4.72)   | 124             | 4.74  | (3.94-5.66)   | 97              | 6.03  | (4.88-7.37)   | 27               | 3.6   | (2.36-5.25)  |
| 2009    | 1540            | 5.07  | (4.82-5.33)   | 1322            | 5.22  | (4.94-5.51)   | 117             | 4.44  | (3.67-5.33)   | 77              | 4.7   | (3.7-5.89)    | 24               | 3.08  | (1.97-4.59)  |
| 2010    | 1631            | 5.3   | (5.04-5.57)   | 1387            | 5.4   | (5.12-5.7)    | 130             | 4.86  | (4.06-5.78)   | 80              | 4.86  | (3.84-6.06)   | 34               | 4.26  | (2.94-5.97)  |
| 2011    | 1691            | 5.44  | (5.19-5.71)   | 1401            | 5.41  | (5.13-5.7)    | 151             | 5.6   | (4.64-6.57)   | 101             | 6.22  | (5.06-7.57)   | 38               | 4.68  | (3.3-6.44)   |
| 2012    | 1809            | 5.76  | (5.49-6.03)   | 1513            | 5.78  | (5.49-6.09)   | 179             | 6.52  | (5.59-7.55)   | 96              | 5.76  | (4.66-7.04)   | 21               | 2.44  | (1.5-3.74)   |
| 2013    | 2015            | 6.3   | (6.03-6.59)   | 1674            | 6.29  | (5.99-6.6)    | 182             | 6.54  | (5.62-7.56)   | 117             | 6.81  | (5.62-8.18)   | 42               | 5.08  | (3.66-6.89)  |
| 2014    | 1998            | 6.11  | (5.85-6.39)   | 1667            | 6.08  | (5.79-6.38)   | 198             | 7.13  | (6.17-8.2)    | 84              | 5.01  | (3.99-6.21)   | 49               | 5.88  | (4.35-7.79)  |
| 2015    | 2127            | 6.45  | (6.18-6.74)   | 1749            | 6.35  | (6.05-6.66)   | 212             | 7.46  | (6.49-8.54)   | 109             | 6.3   | (5.17-7.62)   | 57               | 6.77  | (5.12-8.78)  |
| 2016    | 2088            | 6.28  | (6.01-6.56)   | 1752            | 6.3   | (6-6.6)       | 197             | 6.89  | (5.96-7.93)   | 88              | 5.08  | (4.07-6.27)   | 51               | 6.01  | (4.47-7.92)  |
| 2017    | 2037            | 6.03  | (5.77-6.3)    | 1699            | 6.02  | (5.74-6.32)   | 194             | 6.69  | (5.78-7.71)   | 104             | 5.86  | (4.78-7.11)   | 40               | 4.58  | (3.26-6.24)  |

| INCIDENCE-BASED MORTALITY |          |       |               |          |      |              |          |       |               |          |       |              |          |       |              |
|---------------------------|----------|-------|---------------|----------|------|--------------|----------|-------|---------------|----------|-------|--------------|----------|-------|--------------|
| UK                        |          |       |               |          |      |              |          |       |               |          |       |              |          |       |              |
| England                   |          |       |               |          |      |              |          |       |               |          |       |              |          |       |              |
| Scotland                  |          |       |               |          |      |              |          |       |               |          |       |              |          |       |              |
| Wales                     |          |       |               |          |      |              |          |       |               |          |       |              |          |       |              |
| Northern Ireland          |          |       |               |          |      |              |          |       |               |          |       |              |          |       |              |
| Year                      | Number   |       |               | Number   |      |              | Number   |       |               | Number   |       |              | Number   |       |              |
|                           | of Cases | ASMR  | 95% CI        | of Cases | ASMR | 95% CI       | of Cases | ASMR  | 95% CI        | of Cases | ASMR  | 95% CI       | of Cases | ASMR  | 95% CI       |
| Persons                   |          |       |               |          |      |              |          |       |               |          |       |              |          |       |              |
| 1999                      | 1594     | 3.28  | (3.12-3.44)   | 1275     | 3.13 | (2.96-3.31)  | 187      | 4.55  | (3.91-5.25)   | 98       | 3.76  | (3.05-4.59)  | 34       | 2.9   | (2-4.07)     |
| 2000                      | 1738     | 3.55  | (3.38-3.72)   | 1423     | 3.47 | (3.29-3.66)  | 183      | 4.31  | (3.71-4.99)   | 96       | 3.78  | (3.05-4.62)  | 36       | 3.03  | (2.12-4.2)   |
| 2001                      | 1827     | 3.69  | (3.53-3.87)   | 1522     | 3.68 | (3.5-3.87)   | 178      | 4.16  | (3.57-4.82)   | 107      | 4.05  | (3.32-4.9)   | 20       | 1.6   | (0.97-2.47)  |
| 2002                      | 1958     | 3.92  | (3.75-4.1)    | 1617     | 3.87 | (3.69-4.07)  | 191      | 4.39  | (3.78-5.06)   | 106      | 3.96  | (3.24-4.8)   | 44       | 3.68  | (2.65-4.96)  |
| 2003                      | 2061     | 4.1   | (3.92-4.28)   | 1701     | 4.04 | (3.85-4.24)  | 209      | 4.84  | (4.2-5.54)    | 116      | 4.3   | (3.55-5.16)  | 35       | 2.93  | (2.03-4.08)  |
| 2004                      | 2169     | 4.26  | (4.08-4.44)   | 1752     | 4.11 | (3.92-4.31)  | 256      | 5.9   | (5.19-6.67)   | 131      | 4.77  | (3.98-5.66)  | 30       | 2.32  | (1.56-3.32)  |
| 2005                      | 2315     | 4.52  | (4.34-4.71)   | 1872     | 4.37 | (4.17-4.57)  | 253      | 5.75  | (5.06-6.5)    | 141      | 5.12  | (4.31-6.04)  | 49       | 3.94  | (2.91-5.22)  |
| 2006                      | 2495     | 4.83  | (4.64-5.02)   | 2035     | 4.71 | (4.5-4.92)   | 280      | 6.32  | (5.6-7.11)    | 139      | 5.05  | (4.24-5.96)  | 41       | 3.06  | (2.19-4.17)  |
| 2007                      | 2669     | 5.1   | (4.91-5.3)    | 2135     | 4.89 | (4.69-5.11)  | 307      | 6.74  | (6-7.54)      | 165      | 5.87  | (5.01-6.85)  | 62       | 4.81  | (3.68-6.18)  |
| 2008                      | 2792     | 5.22  | (5.03-5.42)   | 2306     | 5.15 | (4.94-5.37)  | 268      | 5.78  | (5.11-6.52)   | 173      | 6.07  | (5.19-7.05)  | 45       | 3.33  | (2.42-4.46)  |
| 2009                      | 3009     | 5.58  | (5.38-5.78)   | 2505     | 5.55 | (5.34-5.78)  | 271      | 5.79  | (5.12-6.53)   | 176      | 6.2   | (5.31-7.19)  | 57       | 4.17  | (3.15-5.41)  |
| 2010                      | 3101     | 5.66  | (5.46-5.87)   | 2622     | 5.73 | (5.52-5.96)  | 281      | 5.93  | (5.25-6.66)   | 136      | 4.63  | (3.88-5.48)  | 62       | 4.48  | (3.42-5.75)  |
| 2011                      | 3323     | 5.99  | (5.78-6.19)   | 2766     | 5.96 | (5.74-6.19)  | 326      | 6.85  | (6.12-7.63)   | 164      | 5.59  | (4.77-6.52)  | 67       | 4.77  | (3.69-6.07)  |
| 2012                      | 3646     | 6.45  | (6.24-6.66)   | 3050     | 6.45 | (6.22-6.68)  | 344      | 7.15  | (6.41-7.95)   | 183      | 6.13  | (5.27-7.08)  | 69       | 4.71  | (3.66-5.97)  |
| 2013                      | 3896     | 6.77  | (6.56-6.99)   | 3140     | 6.53 | (6.3-6.76)   | 439      | 8.9   | (8.08-9.78)   | 225      | 7.34  | (6.41-8.37)  | 92       | 6.35  | (5.11-7.79)  |
| 2014                      | 4059     | 6.9   | (6.69-7.12)   | 3314     | 6.74 | (6.51-6.97)  | 421      | 8.41  | (7.62-9.25)   | 239      | 7.64  | (6.7-8.68)   | 85       | 5.7   | (4.55-7.06)  |
| 2015                      | 4093     | 6.85  | (6.65-7.07)   | 3303     | 6.62 | (6.39-6.85)  | 446      | 8.74  | (7.95-9.6)    | 242      | 7.69  | (6.75-8.73)  | 102      | 6.66  | (5.43-8.09)  |
| 2016                      | 4307     | 7.11  | (6.9-7.33)    | 3528     | 6.96 | (6.73-7.19)  | 465      | 9.02  | (8.22-9.89)   | 203      | 6.42  | (5.56-7.37)  | 111      | 7.2   | (5.92-8.68)  |
| 2017                      | 4651     | 7.53  | (7.32-7.75)   | 3818     | 7.39 | (7.16-7.63)  | 513      | 9.79  | (8.95-10.67)  | 237      | 7.28  | (6.38-8.27)  | 83       | 5.24  | (4.17-6.51)  |
| Men                       |          |       |               |          |      |              |          |       |               |          |       |              |          |       |              |
| 1999                      | 962      | 4.69  | (4.38-5.01)   | 770      | 4.43 | (4.11-4.77)  | 116      | 7.22  | (5.84-8.8)    | 60       | 5.79  | (4.34-7.55)  | 16       | 2.98  | (1.66-4.91)  |
| 2000                      | 1057     | 5     | (4.69-5.32)   | 883      | 4.95 | (4.62-5.3)   | 104      | 5.71  | (4.64-6.94)   | 51       | 5.23  | (3.78-7.02)  | 19       | 3.76  | (2.23-5.92)  |
| 2001                      | 1072     | 5.12  | (4.81-5.45)   | 908      | 5.18 | (4.83-5.54)  | 98       | 5.4   | (4.36-6.61)   | 51       | 4.74  | (3.46-6.32)  | 15       | 2.65  | (1.47-4.4)   |
| 2002                      | 1169     | 5.45  | (5.14-5.79)   | 956      | 5.32 | (4.98-5.68)  | 122      | 6.51  | (5.39-7.8)    | 64       | 5.8   | (4.41-7.47)  | 27       | 5.7   | (3.61-8.48)  |
| 2003                      | 1303     | 5.98  | (5.65-6.32)   | 1072     | 5.86 | (5.51-6.24)  | 139      | 7.47  | (6.25-8.85)   | 70       | 6.21  | (4.76-7.95)  | 22       | 4.45  | (2.62-6.97)  |
| 2004                      | 1317     | 5.95  | (5.62-6.28)   | 1069     | 5.75 | (5.41-6.12)  | 152      | 8.6   | (7.23-10.14)  | 77       | 6.17  | (4.86-7.73)  | 19       | 3.22  | (1.93-5.05)  |
| 2005                      | 1429     | 6.38  | (6.04-6.72)   | 1158     | 6.17 | (5.81-6.55)  | 162      | 8.49  | (7.19-9.94)   | 76       | 6.27  | (4.91-7.88)  | 33       | 6.33  | (4.32-8.94)  |
| 2006                      | 1581     | 7     | (6.65-7.36)   | 1294     | 6.83 | (6.45-7.22)  | 178      | 9.31  | (7.96-10.82)  | 82       | 7.03  | (5.53-8.8)   | 27       | 4.42  | (2.88-6.47)  |
| 2007                      | 1662     | 7.22  | (6.87-7.59)   | 1315     | 6.83 | (6.46-7.22)  | 218      | 11.25 | (9.73-12.93)  | 94       | 7.59  | (6.1-9.33)   | 35       | 6.2   | (4.29-8.66)  |
| 2008                      | 1749     | 7.4   | (7.05-7.77)   | 1437     | 7.26 | (6.88-7.66)  | 172      | 8.5   | (7.25-9.9)    | 108      | 8.66  | (7.06-10.49) | 32       | 5.24  | (3.56-7.42)  |
| 2009                      | 1850     | 7.75  | (7.39-8.12)   | 1528     | 7.64 | (7.25-8.04)  | 182      | 8.96  | (7.66-10.4)   | 104      | 8.36  | (6.79-10.19) | 36       | 5.82  | (4.04-8.1)   |
| 2010                      | 1936     | 7.95  | (7.59-8.32)   | 1614     | 7.95 | (7.56-8.35)  | 201      | 9.61  | (8.31-11.07)  | 80       | 5.88  | (4.65-7.32)  | 41       | 6.78  | (4.79-9.3)   |
| 2011                      | 2077     | 8.39  | (8.03-8.77)   | 1702     | 8.21 | (7.82-8.61)  | 219      | 10.51 | (9.12-12.06)  | 105      | 7.92  | (6.45-9.62)  | 51       | 8.42  | (6.21-11.14) |
| 2012                      | 2279     | 8.92  | (8.56-9.3)    | 1905     | 8.91 | (8.51-9.32)  | 211      | 9.83  | (8.52-11.27)  | 116      | 8.58  | (7.07-10.31) | 47       | 7.11  | (5.2-9.49)   |
| 2013                      | 2464     | 9.53  | (9.15-9.91)   | 1958     | 9.03 | (8.63-9.45)  | 303      | 13.98 | (12.41-15.69) | 139      | 9.91  | (8.31-11.73) | 64       | 10.34 | (7.85-13.33) |
| 2014                      | 2569     | 9.69  | (9.31-10.07)  | 2060     | 9.27 | (8.87-9.69)  | 281      | 12.74 | (11.26-14.36) | 171      | 11.95 | (10.21-13.9) | 57       | 8.62  | (6.47-11.24) |
| 2015                      | 2576     | 9.53  | (9.17-9.91)   | 2070     | 9.16 | (8.76-9.57)  | 291      | 12.82 | (11.36-14.41) | 148      | 10.28 | (8.67-12.1)  | 67       | 9.8   | (7.55-12.44) |
| 2016                      | 2757     | 10    | (9.62-10.38)  | 2244     | 9.71 | (9.31-10.12) | 311      | 13.63 | (12.12-15.28) | 138      | 9.35  | (7.84-11.06) | 64       | 9.07  | (6.95-11.64) |
| 2017                      | 2981     | 10.57 | (10.19-10.96) | 2435     | 10.3 | (9.89-10.72) | 323      | 13.87 | (12.37-15.49) | 168      | 11.17 | (9.53-13.01) | 55       | 7.6   | (5.71-9.92)  |
| Women                     |          |       |               |          |      |              |          |       |               |          |       |              |          |       |              |
| 1999                      | 632      | 2.23  | (2.06-2.41)   | 505      | 2.14 | (1.95-2.33)  | 71       | 2.87  | (2.24-3.62)   | 38       | 2.5   | (1.76-3.44)  | 18       | 2.69  | (1.59-4.26)  |
| 2000                      | 681      | 2.4   | (2.22-2.59)   | 540      | 2.28 | (2.09-2.48)  | 79       | 3.22  | (2.55-4.01)   | 45       | 2.92  | (2.12-3.91)  | 17       | 2.49  | (1.45-3.98)  |
| 2001                      | 755      | 2.65  | (2.46-2.85)   | 614      | 2.57 | (2.37-2.78)  | 80       | 3.25  | (2.57-4.05)   | 56       | 3.67  | (2.76-4.78)  | 5        | 0.75  | (0.24-1.74)  |
| 2002                      | 789      | 2.74  | (2.55-2.94)   | 661      | 2.74 | (2.54-2.96)  | 69       | 2.76  | (2.15-3.5)    | 42       | 2.73  | (1.96-3.7)   | 17       | 2.44  | (1.42-3.92)  |
| 2003                      | 758      | 2.62  | (2.43-2.81)   | 629      | 2.59 | (2.39-2.81)  | 70       | 2.81  | (2.19-3.56)   | 46       | 3     | (2.19-4.01)  | 13       | 1.95  | (1.04-3.34)  |
| 2004                      | 852      | 2.92  | (2.73-3.13)   | 683      | 2.8  | (2.59-3.02)  | 104      | 4.11  | (3.35-4.98)   | 54       | 3.55  | (2.66-4.63)  | 11       | 1.54  | (0.76-2.77)  |
| 2005                      | 886      | 3.02  | (2.82-3.23)   | 714      | 2.91 | (2.7-3.13)   | 91       | 3.59  | (2.89-4.41)   | 65       | 4.2   | (3.23-5.36)  | 16       | 2.23  | (1.27-3.63)  |
| 2006                      | 914      | 3.11  | (2.91-3.32)   | 741      | 3.01 | (2.8-3.24)   | 102      | 4     | (3.26-4.86)   | 57       | 3.7   | (2.8-4.81)   | 14       | 1.83  | (0.99-3.08)  |
| 2007                      | 1007     | 3.41  | (3.2-3.63)    | 820      | 3.33 | (3.1-3.57)   | 89       | 3.43  | (2.75-4.22)   | 71       | 4.48  | (3.48-5.66)  | 27       | 3.66  | (2.41-5.34)  |
| 2008                      | 1043     | 3.43  | (3.23-3.65)   | 869      | 3.42 | (3.2-3.66)   | 96       | 3.65  | (2.95-4.46)   | 65       | 3.99  | (3.07-5.1)   | 13       | 1.67  | (0.88-2.86)  |
| 2009                      | 1159     | 3.8   | (3.58-4.03)   | 977      | 3.84 | (3.6-4.09)   | 89       | 3.4   | (2.73-4.18)   | 72       | 4.43  | (3.45-5.58)  | 21       | 2.71  | (1.67-4.15)  |
| 2010                      | 1165     | 3.77  | (3.55-3.99)   | 1008     | 3.91 | (3.67-4.16)  | 80       | 3.01  | (2.38-3.75)   | 56       | 3.36  | (2.53-4.37)  | 21       | 2.7   | (1.66-4.14)  |
| 2011                      | 1246     | 4     | (3.78-4.23)   | 1064     | 4.1  | (3.85-4.35)  | 107      | 3.91  | (3.2-4.73)    | 59       | 3.58  | (2.72-4.63)  | 16       | 1.98  | (1.12-3.22)  |
| 2012                      | 1367     | 4.34  | (4.11-4.58)   | 1145     | 4.35 | (4.1-4.62)   | 133      | 4.89  | (4.09-5.8)    | 67       | 4.03  | (3.11-5.12)  | 22       | 2.59  | (1.62-3.92)  |
| 2013                      | 1432     | 4.45  | (4.22-4.69)   | 1182     | 4.42 | (4.17-4.68)  | 136      | 4.91  | (4.12-5.82)   | 86       | 4.91  | (3.92-6.08)  | 28       | 3.32  | (2.2-4.81)   |
| 2014                      | 1490     | 4.56  | (4.33-4.8)    | 1254     | 4.59 | (4.34-4.86)  | 140      | 4.96  | (4.17-5.86)   | 68       | 4.04  | (3.13-5.14)  | 28       | 3.35  | (2.22-4.85)  |
| 2015                      | 1517     | 4.57  | (4.35-4.81)   | 1233     | 4.45 | (4.2-4.7)    | 155      | 5.44  | (4.61-6.37)   | 94       | 5.43  | (4.38-6.65)  | 35       | 4.12  | (2.87-5.74)  |
| 2016                      | 1550     | 4.65  | (4.42-4.89)   | 1284     | 4.59 | (4.34-4.85)  | 154      | 5.44  | (4.61-6.37)   | 65       | 3.73  | (2.87-4.76)  | 47       | 5.49  | (4.02-7.3)   |
| 2017                      | 1670     | 4.93  | (4.7-5.18)    | 1383     | 4.89 | (4.63-5.15)  | 190      | 6.53  | (5.63-7.53)   | 69       | 3.86  | (3-4.89)     | 28       | 3.23  | (2.14-4.68)  |

ASR, Age-standardised Rate; ASMR, Age-standardised Mortality Rate; CI, Confidence Interval

Table S3 Hepatocellular carcinoma incidence and incidence-based mortality rates, by nation, sex, subtype and year

| Year    | INCIDENCE       |      |              |                 |      |             |                 |       |               |                 |       |              |                  |       |              |
|---------|-----------------|------|--------------|-----------------|------|-------------|-----------------|-------|---------------|-----------------|-------|--------------|------------------|-------|--------------|
|         | UK              |      |              | England         |      |             | Scotland        |       |               | Wales           |       |              | Northern Ireland |       |              |
|         | Number of Cases | ASR  | 95% CI       | Number of Cases | ASR  | 95% CI      | Number of Cases | ASR   | 95% CI        | Number of Cases | ASR   | 95% CI       | Number of Cases  | ASR   | 95% CI       |
| Persons |                 |      |              |                 |      |             |                 |       |               |                 |       |              |                  |       |              |
| 1997    | 884             | 1.82 | (1.7-1.94)   | 672             | 1.66 | (1.53-1.79) | 145             | 3.40  | (2.87-4)      | 53              | 2.00  | (1.5-2.62)   | 14               | 1.19  | (0.65-2)     |
| 1998    | 900             | 1.84 | (1.72-1.97)  | 720             | 1.76 | (1.63-1.9)  | 114             | 2.71  | (2.24-3.26)   | 51              | 1.98  | (1.47-2.61)  | 15               | 1.22  | (0.68-2.02)  |
| 1999    | 1000            | 2.02 | (1.9-2.15)   | 806             | 1.95 | (1.81-2.09) | 114             | 2.67  | (2.2-3.21)    | 60              | 2.27  | (1.73-2.92)  | 20               | 1.63  | (0.99-2.53)  |
| 2000    | 1077            | 2.17 | (2.04-2.3)   | 889             | 2.14 | (2-2.28)    | 124             | 2.9   | (2.41-3.46)   | 45              | 1.73  | (1.26-2.31)  | 19               | 1.51  | (0.91-2.37)  |
| 2001    | 1147            | 2.3  | (2.16-2.43)  | 934             | 2.24 | (2.1-2.39)  | 135             | 3.12  | (2.61-3.69)   | 57              | 2.13  | (1.61-2.77)  | 21               | 1.75  | (1.07-2.69)  |
| 2002    | 1278            | 2.55 | (2.41-2.69)  | 1029            | 2.45 | (2.31-2.61) | 150             | 3.42  | (2.89-4.01)   | 64              | 2.39  | (1.84-3.05)  | 35               | 2.82  | (1.95-3.95)  |
| 2003    | 1270            | 2.5  | (2.36-2.64)  | 1014            | 2.38 | (2.24-2.53) | 167             | 3.83  | (3.27-4.46)   | 63              | 2.34  | (1.8-3)      | 26               | 2.15  | (1.4-3.15)   |
| 2004    | 1332            | 2.6  | (2.46-2.75)  | 1051            | 2.46 | (2.31-2.61) | 183             | 4.1   | (3.53-4.75)   | 76              | 2.75  | (2.16-3.45)  | 22               | 1.69  | (1.06-2.57)  |
| 2005    | 1504            | 2.91 | (2.76-3.06)  | 1227            | 2.83 | (2.68-3)    | 175             | 3.91  | (3.35-4.54)   | 64              | 2.35  | (1.81-3.01)  | 38               | 2.9   | (2.04-3.99)  |
| 2006    | 1657            | 3.18 | (3.03-3.34)  | 1318            | 3.03 | (2.86-3.19) | 219             | 4.87  | (4.25-5.57)   | 86              | 3.1   | (2.48-3.84)  | 34               | 2.67  | (1.84-3.74)  |
| 2007    | 1873            | 3.54 | (3.38-3.71)  | 1469            | 3.33 | (3.16-3.5)  | 243             | 5.24  | (4.6-5.95)    | 106             | 3.74  | (3.06-4.53)  | 55               | 4.21  | (3.17-5.49)  |
| 2008    | 1800            | 3.36 | (3.2-3.52)   | 1398            | 3.12 | (2.96-3.29) | 235             | 5     | (4.38-5.68)   | 119             | 4.21  | (3.49-5.04)  | 48               | 3.59  | (2.64-4.77)  |
| 2009    | 2041            | 3.77 | (3.6-3.93)   | 1619            | 3.58 | (3.4-3.75)  | 255             | 5.4   | (4.76-6.11)   | 114             | 4.02  | (3.31-4.83)  | 53               | 3.9   | (2.91-5.11)  |
| 2010    | 2258            | 4.09 | (3.92-4.26)  | 1829            | 3.97 | (3.79-4.16) | 270             | 5.59  | (4.94-6.3)    | 104             | 3.54  | (2.89-4.29)  | 55               | 3.83  | (2.88-5)     |
| 2011    | 2422            | 4.35 | (4.18-4.53)  | 1887            | 4.06 | (3.87-4.24) | 315             | 6.51  | (5.81-7.28)   | 159             | 5.38  | (4.57-6.29)  | 61               | 4.36  | (3.33-5.61)  |
| 2012    | 2653            | 4.68 | (4.5-4.86)   | 2066            | 4.36 | (4.18-4.56) | 356             | 7.21  | (6.48-8.01)   | 154             | 5.12  | (4.34-6)     | 77               | 5.28  | (4.16-6.61)  |
| 2013    | 3043            | 5.28 | (5.09-5.47)  | 2366            | 4.91 | (4.71-5.11) | 412             | 8.25  | (7.47-9.09)   | 176             | 5.75  | (4.93-6.67)  | 89               | 6.04  | (4.84-7.44)  |
| 2014    | 3160            | 5.36 | (5.18-5.55)  | 2525            | 5.13 | (4.93-5.33) | 402             | 7.91  | (7.15-8.72)   | 142             | 4.57  | (3.84-5.39)  | 91               | 6.06  | (4.88-7.45)  |
| 2015    | 3291            | 5.52 | (5.33-5.71)  | 2599            | 5.22 | (5.02-5.42) | 416             | 8.11  | (7.34-8.93)   | 187             | 5.9   | (5.08-6.81)  | 89               | 5.79  | (4.67-7.14)  |
| 2016    | 3496            | 5.76 | (5.57-5.95)  | 2813            | 5.55 | (5.35-5.76) | 430             | 8.18  | (7.43-9)      | 167             | 5.24  | (4.47-6.1)   | 86               | 5.48  | (4.38-6.77)  |
| 2017    | 3368            | 5.45 | (5.27-5.64)  | 2711            | 5.25 | (5.05-5.45) | 409             | 7.71  | (6.98-8.5)    | 169             | 5.23  | (4.47-6.08)  | 79               | 4.95  | (3.92-6.17)  |
| Men     |                 |      |              |                 |      |             |                 |       |               |                 |       |              |                  |       |              |
| 1997    | 647             | 3.03 | (2.8-3.28)   | 487             | 2.73 | (2.49-2.99) | 111             | 5.99  | (4.91-7.24)   | 40              | 3.55  | (2.53-4.84)  | 9                | 1.75  | (0.79-3.35)  |
| 1998    | 660             | 3.06 | (2.82-3.3)   | 532             | 2.92 | (2.68-3.19) | 84              | 4.7   | (3.73-5.83)   | 35              | 3.19  | (2.16-4.51)  | 9                | 1.54  | (0.68-2.96)  |
| 1999    | 724             | 3.29 | (3.05-3.54)  | 587             | 3.18 | (2.92-3.45) | 81              | 4.34  | (3.4-5.45)    | 41              | 3.54  | (2.53-4.81)  | 15               | 2.7   | (1.48-4.52)  |
| 2000    | 837             | 3.81 | (3.55-4.08)  | 700             | 3.77 | (3.49-4.06) | 89              | 5.01  | (3.99-6.21)   | 35              | 3.19  | (2.17-4.49)  | 13               | 2.37  | (1.23-4.09)  |
| 2001    | 842             | 3.8  | (3.54-4.07)  | 684             | 3.68 | (3.4-3.97)  | 107             | 5.76  | (4.69-6.98)   | 36              | 2.98  | (2.08-4.14)  | 15               | 3.37  | (1.7-5.82)   |
| 2002    | 980             | 4.46 | (4.18-4.75)  | 795             | 4.33 | (4.03-4.65) | 116             | 6     | (4.95-7.22)   | 45              | 3.81  | (2.74-5.14)  | 24               | 4.67  | (2.83-7.18)  |
| 2003    | 969             | 4.3  | (4.02-4.58)  | 779             | 4.09 | (3.8-4.4)   | 122             | 6.55  | (5.41-7.86)   | 50              | 4.34  | (3.18-5.76)  | 18               | 3.56  | (2.07-5.68)  |
| 2004    | 1012            | 4.43 | (4.16-4.72)  | 802             | 4.2  | (3.91-4.51) | 138             | 7.09  | (5.94-8.4)    | 55              | 4.43  | (3.33-5.78)  | 17               | 2.95  | (1.69-4.78)  |
| 2005    | 1158            | 5.01 | (4.72-5.31)  | 951             | 4.91 | (4.6-5.24)  | 135             | 6.84  | (5.7-8.13)    | 44              | 3.6   | (2.61-4.84)  | 28               | 4.93  | (3.25-7.18)  |
| 2006    | 1300            | 5.56 | (5.26-5.88)  | 1043            | 5.3  | (4.98-5.64) | 167             | 8.66  | (7.36-10.12)  | 63              | 5.1   | (3.9-6.55)   | 27               | 4.62  | (3.02-6.76)  |
| 2007    | 1449            | 6.04 | (5.73-6.37)  | 1128            | 5.63 | (5.31-5.98) | 199             | 9.71  | (8.38-11.19)  | 80              | 6.12  | (4.84-7.62)  | 42               | 7.13  | (5.1-9.68)   |
| 2008    | 1413            | 5.8  | (5.49-6.11)  | 1111            | 5.45 | (5.13-5.78) | 179             | 8.57  | (7.35-9.94)   | 88              | 6.76  | (5.41-8.33)  | 35               | 5.73  | (3.97-7.99)  |
| 2009    | 1595            | 6.47 | (6.15-6.8)   | 1253            | 6.07 | (5.73-6.42) | 205             | 9.72  | (8.41-11.17)  | 93              | 7.2   | (5.78-8.86)  | 44               | 7.54  | (5.39-10.24) |
| 2010    | 1753            | 6.96 | (6.63-7.29)  | 1422            | 6.76 | (6.41-7.12) | 215             | 9.97  | (8.66-11.43)  | 77              | 5.65  | (4.45-7.09)  | 39               | 6.09  | (4.29-8.37)  |
| 2011    | 1851            | 7.23 | (6.9-7.57)   | 1430            | 6.66 | (6.32-7.02) | 249             | 11.54 | (10.11-13.11) | 124             | 9.11  | (7.55-10.9)  | 48               | 7.69  | (5.65-10.23) |
| 2012    | 2061            | 7.91 | (7.56-8.26)  | 1596            | 7.31 | (6.95-7.68) | 281             | 12.68 | (11.22-14.29) | 121             | 8.97  | (7.42-10.75) | 63               | 9.33  | (7.14-11.97) |
| 2013    | 2365            | 8.93 | (8.57-9.3)   | 1825            | 8.24 | (7.86-8.63) | 335             | 14.98 | (13.39-16.71) | 140             | 9.74  | (8.18-11.51) | 65               | 10.02 | (7.68-12.83) |
| 2014    | 2491            | 9.17 | (8.81-9.54)  | 1994            | 8.78 | (8.39-9.17) | 317             | 13.8  | (12.3-15.43)  | 113             | 7.69  | (6.33-9.25)  | 67               | 9.95  | (7.65-12.71) |
| 2015    | 2551            | 9.22 | (8.86-9.59)  | 2021            | 8.74 | (8.36-9.13) | 325             | 13.95 | (12.45-15.58) | 150             | 10.05 | (8.5-11.81)  | 55               | 7.74  | (5.81-10.1)  |
| 2016    | 2716            | 9.68 | (9.31-10.05) | 2184            | 9.31 | (8.92-9.71) | 330             | 13.82 | (12.35-15.42) | 137             | 9.3   | (7.8-11.01)  | 65               | 8.8   | (6.78-11.24) |
| 2017    | 2643            | 9.22 | (8.87-9.58)  | 2127            | 8.87 | (8.49-9.26) | 321             | 13.31 | (11.87-14.87) | 131             | 8.62  | (7.2-10.24)  | 64               | 8.66  | (6.65-11.08) |
| Women   |                 |      |              |                 |      |             |                 |       |               |                 |       |              |                  |       |              |
| 1997    | 237             | 0.87 | (0.77-0.99)  | 185             | 0.82 | (0.7-0.95)  | 34              | 1.43  | (0.99-2)      | 13              | 0.87  | (0.46-1.5)   | 5                | 0.72  | (0.23-1.67)  |
| 1998    | 240             | 0.86 | (0.75-0.98)  | 188             | 0.81 | (0.7-0.93)  | 30              | 1.22  | (0.82-1.74)   | 16              | 1.11  | (0.63-1.81)  | 6                | 0.9   | (0.33-1.96)  |
| 1999    | 276             | 0.99 | (0.88-1.12)  | 219             | 0.95 | (0.83-1.09) | 33              | 1.35  | (0.93-1.9)    | 19              | 1.24  | (0.74-1.94)  | 5                | 0.74  | (0.24-1.72)  |
| 2000    | 240             | 0.86 | (0.75-0.97)  | 189             | 0.81 | (0.7-0.93)  | 35              | 1.42  | (0.99-1.98)   | 10              | 0.66  | (0.32-1.22)  | 6                | 0.9   | (0.33-1.96)  |
| 2001    | 305             | 1.08 | (0.96-1.21)  | 250             | 1.06 | (0.93-1.2)  | 28              | 1.14  | (0.76-1.65)   | 21              | 1.42  | (0.87-2.18)  | 6                | 0.86  | (0.31-1.88)  |
| 2002    | 298             | 1.05 | (0.94-1.18)  | 234             | 0.99 | (0.87-1.13) | 34              | 1.36  | (0.94-1.91)   | 19              | 1.29  | (0.77-2.01)  | 11               | 1.6   | (0.8-2.87)   |
| 2003    | 301             | 1.06 | (0.94-1.18)  | 235             | 0.99 | (0.86-1.12) | 45              | 1.81  | (1.32-2.42)   | 13              | 0.84  | (0.45-1.45)  | 8                | 1.12  | (0.48-2.21)  |
| 2004    | 320             | 1.12 | (1-1.25)     | 249             | 1.04 | (0.91-1.18) | 45              | 1.81  | (1.32-2.42)   | 21              | 1.36  | (0.84-2.09)  | 5                | 0.73  | (0.24-1.69)  |
| 2005    | 346             | 1.21 | (1.09-1.35)  | 276             | 1.15 | (1.02-1.3)  | 40              | 1.61  | (1.15-2.2)    | 20              | 1.37  | (0.83-2.12)  | 10               | 1.43  | (0.68-2.63)  |
| 2006    | 357             | 1.25 | (1.12-1.38)  | 275             | 1.15 | (1.02-1.3)  | 52              | 2.03  | (1.52-2.67)   | 23              | 1.56  | (0.98-2.34)  | 7                | 0.98  | (0.39-2.02)  |
| 2007    | 424             | 1.45 | (1.31-1.59)  | 341             | 1.39 | (1.25-1.55) | 44              | 1.73  | (1.25-2.32)   | 26              | 1.66  | (1.08-2.45)  | 13               | 1.78  | (0.94-3.05)  |
| 2008    | 387             | 1.31 | (1.18-1.45)  | 287             | 1.16 | (1.03-1.31) | 56              | 2.16  | (1.63-2.81)   | 31              | 1.97  | (1.33-2.8)   | 13               | 1.74  | (0.92-2.98)  |
| 2009    | 446             | 1.51 | (1.37-1.65)  | 366             | 1.47 | (1.33-1.64) | 50              | 1.93  | (1.43-2.55)   | 21              | 1.41  | (0.87-2.16)  | 9                | 1.17  | (0.53-2.22)  |
| 2010    | 505             | 1.68 | (1.54-1.83)  | 407             | 1.63 | (1.47-1.7)  | 55              | 2.07  | (1.56-2.7)    | 27              | 1.64  | (1.08-2.39)  | 16               | 2.06  | (1.17-3.36)  |
| 2011    | 571             | 1.89 | (1.73-2.05)  | 457             | 1.81 | (1.65-1.99) | 66              | 2.46  | (1.9-3.13)    | 35              | 2.21  | (1.54-3.09)  | 13               | 1.63  | (0.86-2.8)   |
| 2012    | 592             | 1.92 | (1.77-2.08)  | 470             | 1.84 | (1.67-2.01) | 75              | 2.76  | (2.17-3.46)   | 33              | 1.99  | (1.37-2.81)  | 14               | 1.69  | (0.92-2.85)  |
| 2013    | 678             | 2.18 | (2.01-2.35)  | 541             | 2.08 | (1.91-2.26) | 77              | 2.82  | (2.23-3.53)   | 36              | 2.18  | (1.52-3.03)  | 24               | 3     | (1.91-4.47)  |
| 2014    | 669             | 2.09 | (1.94-2.26)  | 531             | 1.98 | (1.81-2.15) | 85              | 3.11  | (2.49-3.85)   | 29              | 1.77  | (1.18-2.54)  | 24               | 2.92  | (1.87-4.36)  |
| 2015    | 740             | 2.31 | (2.15-2.48)  | 578             | 2.16 | (1.99-2.35) | 91              | 3.26  | (2.62-4)      | 37              | 2.22  | (1.56-3.06)  | 34               | 4.06  | (2.8-5.68)   |
| 2016    | 780             | 2.39 | (2.22-2.56)  | 629             | 2.31 | (2.13-2.5)  | 100             | 3.5   | (2.85-4.26)   | 30              | 1.7   | (1.15-2.44)  | 21               | 2.5   | (1.54-3.83)  |
| 2017    | 725             | 2.17 | (2.02-2.34)  | 584             | 2.09 | (1.92-2.27) | 88              | 3.08  | (2.47-3.8)    | 38              | 2.19  | (1.54-3.01)  | 15               | 1.80  | (1.01-2.98)  |

INCIDENCE-BASED MORTALITY

| Year    | UK     |                  | England |                  | Scotland |                    | Wales  |                  | Northern Ireland |                  |
|---------|--------|------------------|---------|------------------|----------|--------------------|--------|------------------|------------------|------------------|
|         | Number | c ASMR 95% CI    | Number  | c ASMRf 95% CI   | Number   | c ASMR 95% CI      | Number | c ASMR 95% CI    | Number           | c ASMR 95% CI    |
| Persons |        |                  |         |                  |          |                    |        |                  |                  |                  |
| 1999    | 657    | 1.33 (1.23-1.44) | 520     | 1.26 (1.16-1.38) | 82       | 1.95 (1.55-2.42)   | 43     | 1.63 (1.18-2.2)  | 12               | 1.01 (0.52-1.77) |
| 2000    | 752    | 1.52 (1.41-1.63) | 621     | 1.5 (1.38-1.62)  | 88       | 2.06 (1.65-2.53)   | 34     | 1.32 (0.91-1.85) | 9                | 0.75 (0.34-1.42) |
| 2001    | 788    | 1.58 (1.47-1.69) | 646     | 1.55 (1.43-1.67) | 85       | 1.96 (1.57-2.43)   | 44     | 1.67 (1.21-2.24) | 13               | 1.03 (0.55-1.76) |
| 2002    | 921    | 1.83 (1.71-1.95) | 732     | 1.74 (1.62-1.88) | 116      | 2.63 (2.17-3.16)   | 46     | 1.7 (1.24-2.27)  | 27               | 2.19 (1.43-3.21) |
| 2003    | 940    | 1.86 (1.74-1.98) | 761     | 1.8 (1.67-1.93)  | 118      | 2.68 (2.22-3.21)   | 46     | 1.71 (1.25-2.28) | 15               | 1.24 (0.68-2.06) |
| 2004    | 997    | 1.95 (1.83-2.08) | 800     | 1.87 (1.74-2.01) | 130      | 2.93 (2.45-3.49)   | 55     | 1.98 (1.49-2.58) | 12               | 0.96 (0.5-1.68)  |
| 2005    | 1055   | 2.05 (1.93-2.18) | 829     | 1.92 (1.79-2.06) | 145      | 3.28 (2.76-3.86)   | 55     | 2.02 (1.52-2.63) | 26               | 2.07 (1.35-3.03) |
| 2006    | 1188   | 2.29 (2.16-2.42) | 952     | 2.19 (2.05-2.34) | 154      | 3.45 (2.93-4.05)   | 61     | 2.2 (1.68-2.83)  | 21               | 1.61 (0.99-2.47) |
| 2007    | 1278   | 2.44 (2.3-2.57)  | 987     | 2.26 (2.12-2.4)  | 184      | 3.96 (3.41-4.58)   | 72     | 2.56 (2-3.22)    | 35               | 2.74 (1.9-3.82)  |
| 2008    | 1294   | 2.42 (2.28-2.55) | 1030    | 2.3 (2.16-2.44)  | 160      | 3.43 (2.92-4.01)   | 79     | 2.78 (2.2-3.47)  | 25               | 1.92 (1.24-2.84) |
| 2009    | 1375   | 2.54 (2.41-2.68) | 1107    | 2.45 (2.31-2.6)  | 150      | 3.19 (2.7-3.74)    | 83     | 2.94 (2.34-3.65) | 35               | 2.52 (1.75-3.51) |
| 2010    | 1517   | 2.76 (2.63-2.91) | 1225    | 2.68 (2.53-2.83) | 176      | 3.68 (3.15-4.27)   | 71     | 2.41 (1.88-3.04) | 45               | 3.22 (2.34-4.32) |
| 2011    | 1606   | 2.90 (2.76-3.04) | 1290    | 2.79 (2.64-2.94) | 204      | 4.26 (3.69-4.89)   | 79     | 2.7 (2.14-3.37)  | 33               | 2.32 (1.59-3.26) |
| 2012    | 1852   | 3.27 (3.12-3.43) | 1507    | 3.19 (3.03-3.35) | 197      | 4.05 (3.5-4.66)    | 106    | 3.54 (2.9-4.29)  | 42               | 2.86 (2.05-3.87) |
| 2013    | 1939   | 3.38 (3.23-3.53) | 1509    | 3.15 (2.99-3.31) | 266      | 5.33 (4.71-6.01)   | 103    | 3.39 (2.76-4.11) | 61               | 4.14 (3.17-5.33) |
| 2014    | 2014   | 3.43 (3.28-3.58) | 1592    | 3.24 (3.09-3.41) | 244      | 4.83 (4.24-5.48)   | 123    | 3.9 (3.24-4.65)  | 55               | 3.66 (2.75-4.76) |
| 2015    | 2076   | 3.48 (3.34-3.64) | 1630    | 3.28 (3.12-3.44) | 272      | 5.3 (4.69-5.97)    | 111    | 3.5 (2.88-4.22)  | 63               | 4.11 (3.16-5.27) |
| 2016    | 2236   | 3.70 (3.55-3.86) | 1783    | 3.53 (3.37-3.7)  | 268      | 5.18 (4.58-5.84)   | 115    | 3.62 (2.99-4.35) | 70               | 4.52 (3.52-5.71) |
| 2017    | 2456   | 3.98 (3.82-4.14) | 1953    | 3.79 (3.62-3.96) | 323      | 6.12 (5.47-6.83)   | 131    | 4.01 (3.35-4.75) | 49               | 3.08 (2.27-4.07) |
| Men     |        |                  |         |                  |          |                    |        |                  |                  |                  |
| 1999    | 463    | 2.11 (1.92-2.32) | 372     | 2.01 (1.81-2.23) | 56       | 3.16 (2.34-4.17)   | 26     | 2.24 (1.45-3.29) | 9                | 1.75 (0.77-3.37) |
| 2000    | 582    | 2.66 (2.44-2.89) | 483     | 2.62 (2.39-2.87) | 64       | 3.5 (2.68-4.48)    | 27     | 2.47 (1.58-3.66) | 8                | 1.58 (0.67-3.13) |
| 2001    | 590    | 2.66 (2.44-2.89) | 490     | 2.63 (2.4-2.88)  | 65       | 3.48 (2.67-4.45)   | 25     | 2.16 (1.39-3.2)  | 10               | 1.78 (0.84-3.29) |
| 2002    | 686    | 3.12 (2.88-3.36) | 548     | 2.98 (2.73-3.25) | 90       | 4.65 (3.72-5.73)   | 30     | 2.47 (1.66-3.53) | 18               | 3.75 (2.06-6.15) |
| 2003    | 725    | 3.24 (3-3.49)    | 584     | 3.1 (2.85-3.37)  | 93       | 4.93 (3.96-6.06)   | 36     | 3.13 (2.14-4.41) | 12               | 2.55 (1.14-4.72) |
| 2004    | 757    | 3.34 (3.1-3.59)  | 609     | 3.21 (2.96-3.48) | 98       | 5.22 (4.22-6.38)   | 43     | 3.42 (2.47-4.62) | 7                | 1.13 (0.45-2.34) |
| 2005    | 824    | 3.60 (3.35-3.86) | 652     | 3.39 (3.13-3.67) | 110      | 5.67 (4.62-6.87)   | 40     | 3.3 (2.35-4.5)   | 22               | 4.07 (2.52-6.21) |
| 2006    | 927    | 4.01 (3.75-4.28) | 752     | 3.88 (3.6-4.17)  | 119      | 6.15 (5.07-7.38)   | 43     | 3.47 (2.49-4.71) | 13               | 2.23 (1.17-3.85) |
| 2007    | 992    | 4.19 (3.93-4.46) | 764     | 3.87 (3.59-4.15) | 149      | 7.29 (6.14-8.58)   | 52     | 4.01 (2.99-5.27) | 27               | 4.72 (3.09-6.9)  |
| 2008    | 1013   | 4.15 (3.89-4.42) | 809     | 3.95 (3.68-4.23) | 122      | 5.85 (4.85-7)      | 61     | 4.75 (3.63-6.11) | 21               | 3.51 (2.16-5.37) |
| 2009    | 1056   | 4.31 (4.05-4.58) | 850     | 4.13 (3.86-4.43) | 120      | 5.75 (4.74-6.9)    | 62     | 4.92 (3.74-6.35) | 24               | 3.77 (2.39-5.64) |
| 2010    | 1188   | 4.77 (4.5-5.06)  | 953     | 4.59 (4.3-4.89)  | 149      | 6.97 (5.89-8.2)    | 54     | 3.92 (2.94-5.12) | 32               | 5.27 (3.53-7.54) |
| 2011    | 1234   | 4.88 (4.61-5.16) | 980     | 4.62 (4.33-4.92) | 159      | 7.58 (6.4-8.9)     | 64     | 4.72 (3.62-6.04) | 31               | 4.93 (3.33-7.03) |
| 2012    | 1435   | 5.52 (5.24-5.82) | 1170    | 5.37 (5.07-5.69) | 153      | 7.02 (5.93-8.25)   | 80     | 5.85 (4.62-7.29) | 32               | 4.79 (3.26-6.79) |
| 2013    | 1507   | 5.72 (5.43-6.02) | 1155    | 5.24 (4.94-5.55) | 218      | 9.72 (8.45-11.12)  | 90     | 6.41 (5.14-7.89) | 44               | 6.75 (4.86-9.12) |
| 2014    | 1581   | 5.88 (5.6-6.19)  | 1232    | 5.48 (5.18-5.8)  | 203      | 9.09 (7.85-10.46)  | 102    | 6.94 (5.64-8.43) | 44               | 6.51 (4.69-8.8)  |
| 2015    | 1611   | 5.89 (5.6-6.19)  | 1269    | 5.56 (5.25-5.87) | 211      | 9.08 (7.88-10.41)  | 86     | 5.77 (4.6-7.13)  | 45               | 6.56 (4.75-8.83) |
| 2016    | 1754   | 6.30 (6-6.6)     | 1400    | 6 (5.69-6.33)    | 213      | 9.09 (7.89-10.41)  | 94     | 6.32 (5.1-7.74)  | 47               | 6.54 (4.79-8.72) |
| 2017    | 1918   | 6.74 (6.44-7.05) | 1528    | 6.41 (6.09-6.74) | 244      | 10.33 (9.05-11.73) | 106    | 6.96 (5.69-8.43) | 40               | 5.55 (3.95-7.57) |
| Women   |        |                  |         |                  |          |                    |        |                  |                  |                  |
| 1999    | 194    | 0.69 (0.6-0.8)   | 148     | 0.64 (0.54-0.75) | 26       | 1.04 (0.68-1.52)   | 17     | 1.12 (0.65-1.8)  | 3                | 0.44 (0.09-1.28) |
| 2000    | 170    | 0.61 (0.52-0.71) | 138     | 0.6 (0.5-0.71)   | 24       | 0.98 (0.63-1.46)   | 7      | 0.46 (0.18-0.95) | 1                | 0.16 (0-0.88)    |
| 2001    | 198    | 0.70 (0.61-0.81) | 156     | 0.66 (0.56-0.78) | 20       | 0.81 (0.49-1.25)   | 19     | 1.28 (0.76-2)    | 3                | 0.44 (0.09-1.28) |
| 2002    | 235    | 0.84 (0.73-0.95) | 184     | 0.78 (0.67-0.9)  | 26       | 1.06 (0.69-1.56)   | 16     | 1.1 (0.63-1.8)   | 9                | 1.26 (0.57-2.39) |
| 2003    | 215    | 0.74 (0.65-0.85) | 177     | 0.73 (0.63-0.85) | 25       | 1 (0.64-1.47)      | 10     | 0.62 (0.29-1.14) | 3                | 0.46 (0.1-1.35)  |
| 2004    | 240    | 0.84 (0.74-0.96) | 191     | 0.8 (0.69-0.92)  | 32       | 1.3 (0.89-1.84)    | 12     | 0.77 (0.39-1.34) | 5                | 0.75 (0.24-1.74) |
| 2005    | 231    | 0.81 (0.71-0.92) | 177     | 0.74 (0.63-0.85) | 35       | 1.41 (0.98-1.97)   | 15     | 1 (0.56-1.66)    | 4                | 0.6 (0.16-1.53)  |
| 2006    | 261    | 0.89 (0.79-1.01) | 200     | 0.82 (0.71-0.94) | 35       | 1.37 (0.95-1.91)   | 18     | 1.21 (0.71-1.92) | 8                | 1.05 (0.45-2.09) |
| 2007    | 286    | 0.99 (0.88-1.11) | 223     | 0.92 (0.8-1.05)  | 35       | 1.37 (0.95-1.91)   | 20     | 1.31 (0.8-2.03)  | 8                | 1.14 (0.49-2.25) |
| 2008    | 281    | 0.95 (0.84-1.07) | 221     | 0.89 (0.77-1.01) | 38       | 1.49 (1.05-2.04)   | 18     | 1.18 (0.7-1.87)  | 4                | 0.51 (0.14-1.32) |
| 2009    | 319    | 1.07 (0.95-1.2)  | 257     | 1.03 (0.9-1.16)  | 30       | 1.16 (0.78-1.66)   | 21     | 1.36 (0.84-2.08) | 11               | 1.46 (0.73-2.63) |
| 2010    | 329    | 1.09 (0.98-1.22) | 272     | 1.09 (0.96-1.23) | 27       | 1.02 (0.67-1.48)   | 17     | 1.03 (0.6-1.66)  | 13               | 1.67 (0.88-2.86) |
| 2011    | 372    | 1.22 (1.1-1.36)  | 310     | 1.22 (1.09-1.37) | 45       | 1.68 (1.22-2.25)   | 15     | 0.95 (0.53-1.57) | 2                | 0.25 (0.03-0.91) |
| 2012    | 417    | 1.36 (1.23-1.49) | 337     | 1.32 (1.18-1.47) | 44       | 1.65 (1.2-2.21)    | 26     | 1.58 (1.03-2.32) | 10               | 1.15 (0.55-2.11) |
| 2013    | 432    | 1.38 (1.25-1.52) | 354     | 1.35 (1.22-1.5)  | 48       | 1.77 (1.31-2.35)   | 13     | 0.79 (0.41-1.35) | 17               | 2.04 (1.18-3.27) |
| 2014    | 433    | 1.36 (1.23-1.49) | 360     | 1.35 (1.21-1.5)  | 41       | 1.47 (1.05-2)      | 21     | 1.22 (0.76-1.87) | 11               | 1.38 (0.69-2.48) |
| 2015    | 465    | 1.44 (1.31-1.57) | 361     | 1.34 (1.2-1.49)  | 61       | 2.15 (1.64-2.76)   | 25     | 1.49 (0.96-2.21) | 18               | 2.16 (1.28-3.42) |
| 2016    | 482    | 1.48 (1.35-1.62) | 383     | 1.4 (1.27-1.55)  | 55       | 1.96 (1.47-2.56)   | 21     | 1.22 (0.75-1.86) | 23               | 2.71 (1.71-4.08) |
| 2017    | 538    | 1.61 (1.48-1.76) | 425     | 1.53 (1.38-1.68) | 79       | 2.74 (2.17-3.42)   | 25     | 1.41 (0.91-2.09) | 9                | 1.05 (0.48-2)    |

ASR, Age-standardised Rate; ASMR, Age-standardised Mortality Rate; CI, Confidence Interval

Table S4 Intrahepatic cholangiocarcinoma incidence and incidence-based mortality rates, by nation, sex, subtype and year

| Year    | INCIDENCE       |      |             |                 |      |             |                 |      |             |                 |      |             |                  |      |             |
|---------|-----------------|------|-------------|-----------------|------|-------------|-----------------|------|-------------|-----------------|------|-------------|------------------|------|-------------|
|         | UK              |      |             | England         |      |             | Scotland        |      |             | Wales           |      |             | Northern Ireland |      |             |
|         | Number of Cases | ASR  | 95% CI      | Number of Cases | ASR  | 95% CI      | Number of Cases | ASR  | 95% CI      | Number of Cases | ASR  | 95% CI      | Number of Cases  | ASR  | 95% CI      |
| Persons |                 |      |             |                 |      |             |                 |      |             |                 |      |             |                  |      |             |
| 1997    | 875             | 1.84 | (1.72-1.96) | 712             | 1.79 | (1.66-1.92) | 81              | 1.98 | (1.57-2.46) | 46              | 1.78 | (1.3-2.38)  | 36               | 3.16 | (2.21-4.37) |
| 1998    | 919             | 1.92 | (1.79-2.05) | 729             | 1.81 | (1.68-1.95) | 117             | 2.97 | (2.45-3.57) | 46              | 1.75 | (1.28-2.34) | 27               | 2.32 | (1.53-3.38) |
| 1999    | 858             | 1.78 | (1.66-1.9)  | 676             | 1.67 | (1.54-1.8)  | 106             | 2.58 | (2.11-3.13) | 55              | 2.13 | (1.6-2.77)  | 21               | 1.92 | (1.18-2.95) |
| 2000    | 1058            | 2.18 | (2.05-2.31) | 850             | 2.09 | (1.95-2.24) | 113             | 2.65 | (2.19-3.19) | 68              | 2.66 | (2.06-3.37) | 27               | 2.25 | (1.48-3.27) |
| 2001    | 1014            | 2.06 | (1.93-2.19) | 850             | 2.05 | (1.92-2.2)  | 100             | 2.4  | (1.95-2.92) | 63              | 2.4  | (1.84-3.08) | 1                | 0.08 | (0-0.47)    |
| 2002    | 1055            | 2.12 | (2-2.26)    | 874             | 2.11 | (1.97-2.25) | 91              | 2.11 | (1.7-2.59)  | 62              | 2.35 | (1.8-3.01)  | 28               | 2.42 | (1.6-3.51)  |
| 2003    | 1076            | 2.15 | (2.02-2.28) | 882             | 2.11 | (1.97-2.25) | 105             | 2.49 | (2.03-3.02) | 73              | 2.68 | (2.1-3.37)  | 16               | 1.37 | (0.78-2.23) |
| 2004    | 1204            | 2.37 | (2.24-2.51) | 987             | 2.33 | (2.18-2.48) | 119             | 2.81 | (2.32-3.37) | 81              | 2.93 | (2.33-3.65) | 17               | 1.37 | (0.79-2.21) |
| 2005    | 1269            | 2.48 | (2.35-2.62) | 1035            | 2.42 | (2.27-2.57) | 131             | 3.02 | (2.53-3.59) | 83              | 3.04 | (2.42-3.77) | 20               | 1.63 | (0.99-2.52) |
| 2006    | 1417            | 2.75 | (2.61-2.9)  | 1172            | 2.72 | (2.57-2.88) | 121             | 2.74 | (2.27-3.28) | 83              | 3.06 | (2.44-3.8)  | 41               | 3.19 | (2.28-4.34) |
| 2007    | 1382            | 2.63 | (2.49-2.77) | 1133            | 2.58 | (2.43-2.74) | 129             | 2.89 | (2.4-3.43)  | 104             | 3.63 | (2.96-4.41) | 16               | 1.15 | (0.65-1.87) |
| 2008    | 1507            | 2.83 | (2.68-2.97) | 1264            | 2.83 | (2.68-2.99) | 111             | 2.42 | (1.98-2.92) | 109             | 3.87 | (3.18-4.68) | 23               | 1.68 | (1.06-2.54) |
| 2009    | 1644            | 3.05 | (2.9-3.2)   | 1400            | 3.11 | (2.94-3.27) | 124             | 2.67 | (2.21-3.18) | 98              | 3.4  | (2.75-4.15) | 22               | 1.6  | (1-2.43)    |
| 2010    | 1602            | 2.92 | (2.78-3.07) | 1386            | 3.03 | (2.87-3.19) | 122             | 2.58 | (2.14-3.08) | 82              | 2.81 | (2.23-3.49) | 12               | 0.87 | (0.44-1.54) |
| 2011    | 1743            | 3.14 | (3-3.29)    | 1486            | 3.2  | (3.04-3.37) | 135             | 2.9  | (2.43-3.44) | 94              | 3.2  | (2.59-3.92) | 28               | 2.01 | (1.33-2.92) |
| 2012    | 1776            | 3.15 | (3-3.3)     | 1472            | 3.12 | (2.96-3.29) | 169             | 3.55 | (3.03-4.13) | 112             | 3.76 | (3.09-4.52) | 23               | 1.54 | (0.97-2.31) |
| 2013    | 1883            | 3.26 | (3.12-3.41) | 1539            | 3.19 | (3.03-3.35) | 190             | 3.86 | (3.33-4.45) | 125             | 4.08 | (3.39-4.86) | 29               | 2.05 | (1.37-2.96) |
| 2014    | 1895            | 3.22 | (3.08-3.37) | 1559            | 3.16 | (3.01-3.32) | 194             | 3.88 | (3.35-4.46) | 109             | 3.54 | (2.9-4.27)  | 33               | 2.18 | (1.5-3.07)  |
| 2015    | 2104            | 3.52 | (3.37-3.68) | 1715            | 3.44 | (3.27-3.6)  | 218             | 4.26 | (3.71-4.87) | 135             | 4.29 | (3.6-5.08)  | 36               | 2.37 | (1.65-3.28) |
| 2016    | 2068            | 3.41 | (3.27-3.56) | 1754            | 3.46 | (3.29-3.62) | 173             | 3.36 | (2.88-3.9)  | 103             | 3.27 | (2.67-3.97) | 38               | 2.51 | (1.77-3.45) |
| 2017    | 2053            | 3.33 | (3.18-3.47) | 1728            | 3.34 | (3.19-3.51) | 189             | 3.63 | (3.13-4.19) | 98              | 3.01 | (2.45-3.68) | 38               | 2.37 | (1.68-3.26) |
| Men     |                 |      |             |                 |      |             |                 |      |             |                 |      |             |                  |      |             |
| 1997    | 411             | 2.04 | (1.84-2.25) | 340             | 2.02 | (1.81-2.26) | 36              | 2    | (1.38-2.79) | 18              | 1.62 | (0.95-2.57) | 17               | 3.63 | (2.1-5.83)  |
| 1998    | 432             | 2.2  | (1.99-2.43) | 336             | 2.01 | (1.79-2.25) | 54              | 3.88 | (2.77-5.23) | 28              | 2.54 | (1.68-3.69) | 14               | 2.97 | (1.59-5.02) |
| 1999    | 410             | 2.08 | (1.88-2.3)  | 331             | 1.99 | (1.77-2.22) | 52              | 3.25 | (2.4-4.29)  | 24              | 2.5  | (1.55-3.79) | 3                | 0.67 | (0.11-2.02) |
| 2000    | 483             | 2.39 | (2.17-2.62) | 396             | 2.32 | (2.09-2.57) | 52              | 2.98 | (2.2-3.94)  | 24              | 2.64 | (1.59-4.07) | 11               | 2.09 | (1.03-3.77) |
| 2001    | 476             | 2.4  | (2.17-2.63) | 409             | 2.45 | (2.2-2.71)  | 35              | 2.03 | (1.4-2.84)  | 32              | 3.21 | (2.1-4.65)  | 0                | 0    | (-)         |
| 2002    | 488             | 2.37 | (2.16-2.6)  | 405             | 2.35 | (2.12-2.6)  | 39              | 2.22 | (1.54-3.07) | 29              | 2.76 | (1.79-4.05) | 15               | 3.12 | (1.71-5.19) |
| 2003    | 526             | 2.52 | (2.3-2.75)  | 431             | 2.48 | (2.24-2.73) | 51              | 2.96 | (2.16-3.93) | 34              | 2.89 | (1.96-4.08) | 10               | 1.83 | (0.87-3.38) |
| 2004    | 548             | 2.54 | (2.33-2.77) | 456             | 2.52 | (2.29-2.77) | 51              | 3.06 | (2.24-4.08) | 33              | 2.63 | (1.8-3.7)   | 8                | 1.54 | (0.64-3.08) |
| 2005    | 607             | 2.76 | (2.54-3)    | 499             | 2.71 | (2.48-2.97) | 61              | 3.25 | (2.46-4.2)  | 36              | 3.2  | (2.19-4.49) | 11               | 1.99 | (0.98-3.58) |
| 2006    | 683             | 3.15 | (2.91-3.41) | 559             | 3.08 | (2.82-3.35) | 62              | 3.43 | (2.58-4.45) | 40              | 3.41 | (2.41-4.67) | 22               | 4.2  | (2.52-6.51) |
| 2007    | 613             | 2.73 | (2.52-2.97) | 502             | 2.66 | (2.43-2.92) | 56              | 3.12 | (2.32-4.11) | 49              | 4.05 | (2.97-5.38) | 6                | 1.05 | (0.37-2.32) |
| 2008    | 732             | 3.21 | (2.97-3.45) | 615             | 3.23 | (2.97-3.5)  | 52              | 2.65 | (1.95-3.51) | 54              | 4.39 | (3.26-5.79) | 11               | 1.63 | (0.79-2.95) |
| 2009    | 772             | 3.34 | (3.1-3.59)  | 652             | 3.37 | (3.11-3.65) | 60              | 3.04 | (2.31-3.92) | 49              | 3.94 | (2.88-5.25) | 11               | 1.91 | (0.93-3.47) |
| 2010    | 731             | 3.09 | (2.86-3.33) | 632             | 3.19 | (2.94-3.45) | 56              | 2.76 | (2.06-3.61) | 34              | 2.66 | (1.83-3.74) | 9                | 1.62 | (0.65-3.22) |
| 2011    | 838             | 3.48 | (3.25-3.73) | 724             | 3.58 | (3.32-3.86) | 56              | 2.81 | (2.1-3.67)  | 43              | 3.44 | (2.46-4.68) | 15               | 2.41 | (1.33-4.01) |
| 2012    | 837             | 3.37 | (3.14-3.61) | 695             | 3.35 | (3.1-3.61)  | 70              | 3.33 | (2.59-4.22) | 54              | 4.14 | (3.08-5.43) | 18               | 2.6  | (1.53-4.13) |
| 2013    | 894             | 3.53 | (3.3-3.78)  | 736             | 3.46 | (3.21-3.72) | 92              | 4.49 | (3.59-5.55) | 53              | 3.77 | (2.82-4.94) | 13               | 2.7  | (1.33-4.76) |
| 2014    | 907             | 3.49 | (3.26-3.73) | 736             | 3.37 | (3.13-3.63) | 95              | 4.42 | (3.56-5.42) | 63              | 4.57 | (3.5-5.86)  | 13               | 1.97 | (1.04-3.39) |
| 2015    | 1005            | 3.78 | (3.54-4.02) | 811             | 3.65 | (3.4-3.91)  | 101             | 4.49 | (3.63-5.48) | 75              | 5.2  | (4.07-6.53) | 18               | 2.63 | (1.54-4.17) |
| 2016    | 1002            | 3.69 | (3.46-3.92) | 859             | 3.77 | (3.52-4.03) | 79              | 3.58 | (2.81-4.48) | 52              | 3.57 | (2.66-4.69) | 12               | 1.71 | (0.88-3)    |
| 2017    | 991             | 3.6  | (3.38-3.83) | 843             | 3.65 | (3.41-3.91) | 89              | 3.92 | (3.13-4.83) | 41              | 2.79 | (1.99-3.79) | 18               | 2.33 | (1.37-3.69) |
| Women   |                 |      |             |                 |      |             |                 |      |             |                 |      |             |                  |      |             |
| 1997    | 464             | 1.63 | (1.49-1.79) | 372             | 1.57 | (1.41-1.74) | 45              | 1.82 | (1.33-2.44) | 28              | 1.86 | (1.23-2.69) | 19               | 2.73 | (1.64-4.26) |
| 1998    | 487             | 1.74 | (1.59-1.9)  | 393             | 1.68 | (1.52-1.86) | 63              | 2.58 | (1.98-3.3)  | 18              | 1.21 | (0.71-1.91) | 13               | 1.98 | (1.05-3.39) |
| 1999    | 448             | 1.6  | (1.45-1.76) | 345             | 1.47 | (1.32-1.63) | 54              | 2.24 | (1.68-2.92) | 31              | 2.11 | (1.43-3)    | 18               | 2.72 | (1.61-4.3)  |
| 2000    | 575             | 2.03 | (1.87-2.21) | 454             | 1.92 | (1.75-2.11) | 61              | 2.45 | (1.87-3.15) | 44              | 2.83 | (2.05-3.81) | 16               | 2.34 | (1.34-3.81) |
| 2001    | 538             | 1.88 | (1.72-2.04) | 441             | 1.83 | (1.67-2.02) | 65              | 2.65 | (2.04-3.38) | 31              | 2.07 | (1.4-2.94)  | 1                | 0.16 | (0-0.87)    |
| 2002    | 567             | 1.96 | (1.8-2.13)  | 469             | 1.94 | (1.77-2.12) | 52              | 2.01 | (1.5-2.64)  | 33              | 2.19 | (1.5-3.09)  | 13               | 1.91 | (1.01-3.28) |
| 2003    | 550             | 1.89 | (1.73-2.05) | 451             | 1.84 | (1.68-2.02) | 54              | 2.19 | (1.65-2.86) | 39              | 2.52 | (1.79-3.46) | 6                | 0.9  | (0.33-1.97) |
| 2004    | 656             | 2.24 | (2.07-2.42) | 531             | 2.17 | (1.99-2.36) | 68              | 2.67 | (2.07-3.39) | 48              | 3.06 | (2.25-4.07) | 9                | 1.29 | (0.58-2.46) |
| 2005    | 662             | 2.24 | (2.07-2.42) | 536             | 2.17 | (1.99-2.36) | 70              | 2.73 | (2.13-3.46) | 47              | 3.05 | (2.24-4.07) | 9                | 1.22 | (0.55-2.32) |
| 2006    | 734             | 2.5  | (2.32-2.69) | 613             | 2.5  | (2.3-2.7)   | 59              | 2.3  | (1.75-2.97) | 43              | 2.86 | (2.07-3.87) | 19               | 2.55 | (1.53-3.98) |
| 2007    | 769             | 2.58 | (2.4-2.77)  | 631             | 2.54 | (2.34-2.75) | 73              | 2.84 | (2.23-3.58) | 55              | 3.3  | (2.47-4.3)  | 10               | 1.27 | (0.61-2.34) |
| 2008    | 775             | 2.55 | (2.37-2.74) | 649             | 2.55 | (2.36-2.76) | 59              | 2.25 | (1.71-2.91) | 55              | 3.41 | (2.56-4.45) | 12               | 1.66 | (0.85-2.9)  |
| 2009    | 872             | 2.84 | (2.66-3.04) | 748             | 2.93 | (2.72-3.15) | 64              | 2.39 | (1.84-3.06) | 49              | 2.91 | (2.15-3.86) | 11               | 1.43 | (0.71-2.57) |
| 2010    | 871             | 2.8  | (2.61-2.99) | 754             | 2.9  | (2.69-3.12) | 66              | 2.46 | (1.9-3.13)  | 48              | 2.89 | (2.12-3.84) | 3                | 0.38 | (0.08-1.13) |
| 2011    | 905             | 2.89 | (2.71-3.09) | 762             | 2.92 | (2.72-3.14) | 79              | 2.92 | (2.31-3.65) | 51              | 3.1  | (2.3-4.09)  | 13               | 1.62 | (0.86-2.78) |
| 2012    | 939             | 2.97 | (2.78-3.17) | 777             | 2.95 | (2.75-3.17) | 99              | 3.57 | (2.9-4.36)  | 58              | 3.47 | (2.63-4.5)  | 5                | 0.56 | (0.18-1.3)  |
| 2013    | 989             | 3.05 | (2.86-3.25) | 803             | 2.98 | (2.77-3.19) | 98              | 3.46 | (2.81-4.22) | 72              | 4.13 | (3.22-5.21) | 16               | 1.89 | (1.07-3.07) |
| 2014    | 988             | 3.01 | (2.82-3.2)  | 823             | 2.99 | (2.79-3.2)  | 99              | 3.52 | (2.86-4.29) | 46              | 2.72 | (1.98-3.63) | 20               | 2.37 | (1.44-3.67) |
| 2015    | 1099            | 3.29 | (3.1-3.49)  | 904             | 3.24 | (3.03-3.46) | 117             | 4.06 | (3.35-4.86) | 60              | 3.42 | (2.61-4.42) | 18               | 2.1  | (1.24-3.33) |
| 2016    | 1066            | 3.19 | (3-3.39)    | 895             | 3.19 | (2.98-3.41) | 94              | 3.29 | (2.65-4.02) | 51              | 2.98 | (2.22-3.93) | 26               | 3.08 | (2.01-4.52) |
| 2017    | 1062            | 3.13 | (2.94-3.32) | 885             | 3.12 | (2.92-3.34) | 100             | 3.4  | (2.76-4.14) | 57              | 3.15 | (2.38-4.09) | 20               | 2.27 | (1.38-3.51) |



| INCIDENCE-BASED MORTALITY |                 |                  |                 |                  |                 |                  |                 |                  |                  |                  |
|---------------------------|-----------------|------------------|-----------------|------------------|-----------------|------------------|-----------------|------------------|------------------|------------------|
| Year                      | UK              |                  | England         |                  | Scotland        |                  | Wales           |                  | Northern Ireland |                  |
|                           | Number of Cases | ASMR 95% CI      | Number of Cases | ASMR 95% CI      | Number of Cases | ASMR 95% CI      | Number of Cases | ASMR 95% CI      | Number of Cases  | ASMR 95% CI      |
| Persons                   |                 |                  |                 |                  |                 |                  |                 |                  |                  |                  |
| 1999                      | 689             | 1.43 (1.32-1.54) | 549             | 1.36 (1.25-1.48) | 84              | 2.09 (1.66-2.59) | 40              | 1.55 (1.11-2.12) | 16               | 1.43 (0.81-2.33) |
| 2000                      | 777             | 1.6 (1.49-1.72)  | 627             | 1.54 (1.42-1.67) | 81              | 1.92 (1.52-2.38) | 50              | 1.99 (1.47-2.63) | 19               | 1.6 (0.96-2.5)   |
| 2001                      | 868             | 1.77 (1.65-1.89) | 725             | 1.77 (1.64-1.9)  | 81              | 1.92 (1.52-2.39) | 55              | 2.09 (1.57-2.72) | 7                | 0.57 (0.23-1.17) |
| 2002                      | 856             | 1.73 (1.61-1.85) | 722             | 1.74 (1.62-1.87) | 70              | 1.63 (1.27-2.06) | 47              | 1.77 (1.3-2.36)  | 17               | 1.48 (0.86-2.38) |
| 2003                      | 902             | 1.81 (1.69-1.93) | 754             | 1.8 (1.68-1.94)  | 79              | 1.85 (1.46-2.31) | 55              | 2.06 (1.55-2.69) | 14               | 1.24 (0.67-2.08) |
| 2004                      | 982             | 1.94 (1.82-2.06) | 786             | 1.85 (1.72-1.98) | 111             | 2.62 (2.15-3.16) | 70              | 2.58 (2.01-3.27) | 15               | 1.16 (0.65-1.92) |
| 2005                      | 1048            | 2.06 (1.93-2.18) | 869             | 2.04 (1.91-2.18) | 95              | 2.17 (1.75-2.65) | 70              | 2.54 (1.98-3.22) | 14               | 1.11 (0.6-1.88)  |
| 2006                      | 1116            | 2.17 (2.05-2.3)  | 921             | 2.14 (2.01-2.29) | 111             | 2.54 (2.08-3.06) | 69              | 2.52 (1.96-3.19) | 15               | 1.12 (0.63-1.86) |
| 2007                      | 1152            | 2.21 (2.08-2.34) | 946             | 2.17 (2.04-2.32) | 95              | 2.12 (1.71-2.6)  | 87              | 3.1 (2.48-3.83)  | 24               | 1.83 (1.17-2.72) |
| 2008                      | 1231            | 2.3 (2.17-2.43)  | 1038            | 2.32 (2.18-2.47) | 92              | 2.01 (1.61-2.47) | 85              | 2.97 (2.37-3.68) | 16               | 1.11 (0.63-1.81) |
| 2009                      | 1389            | 2.58 (2.45-2.72) | 1178            | 2.62 (2.47-2.77) | 107             | 2.32 (1.89-2.8)  | 87              | 3.04 (2.43-3.76) | 17               | 1.3 (0.75-2.09)  |
| 2010                      | 1307            | 2.39 (2.26-2.52) | 1153            | 2.52 (2.38-2.67) | 86              | 1.82 (1.45-2.25) | 58              | 1.98 (1.5-2.56)  | 10               | 0.76 (0.36-1.4)  |
| 2011                      | 1449            | 2.61 (2.47-2.74) | 1240            | 2.67 (2.52-2.82) | 109             | 2.31 (1.89-2.79) | 76              | 2.58 (2.03-3.23) | 24               | 1.66 (1.06-2.47) |
| 2012                      | 1504            | 2.67 (2.53-2.81) | 1283            | 2.72 (2.57-2.87) | 136             | 2.86 (2.39-3.38) | 69              | 2.33 (1.81-2.95) | 16               | 1.1 (0.62-1.78)  |
| 2013                      | 1542            | 2.68 (2.55-2.82) | 1242            | 2.58 (2.44-2.73) | 160             | 3.31 (2.81-3.86) | 114             | 3.69 (3.04-4.44) | 26               | 1.85 (1.2-2.72)  |
| 2014                      | 1589            | 2.7 (2.57-2.83)  | 1312            | 2.66 (2.52-2.81) | 160             | 3.21 (2.73-3.76) | 95              | 3.09 (2.5-3.78)  | 22               | 1.46 (0.91-2.22) |
| 2015                      | 1681            | 2.81 (2.68-2.95) | 1365            | 2.73 (2.58-2.88) | 164             | 3.24 (2.76-3.77) | 118             | 3.77 (3.11-4.51) | 34               | 2.22 (1.53-3.1)  |
| 2016                      | 1719            | 2.84 (2.7-2.97)  | 1425            | 2.8 (2.66-2.95)  | 187             | 3.64 (3.13-4.2)  | 75              | 2.39 (1.88-3)    | 32               | 2.09 (1.43-2.96) |
| 2017                      | 1851            | 3 (2.86-3.14)    | 1562            | 3.02 (2.87-3.17) | 177             | 3.4 (2.91-3.94)  | 90              | 2.79 (2.24-3.43) | 22               | 1.41 (0.88-2.14) |
| Men                       |                 |                  |                 |                  |                 |                  |                 |                  |                  |                  |
| 1999                      | 341             | 1.75 (1.56-1.96) | 270             | 1.62 (1.43-1.84) | 45              | 3.07 (2.15-4.23) | 22              | 2.32 (1.4-3.58)  | 4                | 0.78 (0.21-1.99) |
| 2000                      | 346             | 1.73 (1.54-1.93) | 290             | 1.71 (1.51-1.92) | 32              | 1.79 (1.21-2.55) | 17              | 2.07 (1.11-3.45) | 7                | 1.42 (0.54-2.98) |
| 2001                      | 392             | 2.03 (1.82-2.26) | 337             | 2.08 (1.85-2.33) | 26              | 1.57 (1.01-2.33) | 24              | 2.42 (1.48-3.7)  | 5                | 0.88 (0.28-2.06) |
| 2002                      | 383             | 1.86 (1.67-2.07) | 321             | 1.86 (1.65-2.08) | 28              | 1.64 (1.08-2.39) | 25              | 2.3 (1.45-3.44)  | 9                | 1.95 (0.88-3.73) |
| 2003                      | 439             | 2.07 (1.87-2.28) | 373             | 2.1 (1.88-2.33)  | 39              | 2.06 (1.45-2.84) | 21              | 1.98 (1.16-3.11) | 6                | 1.28 (0.45-2.83) |
| 2004                      | 447             | 2.09 (1.9-2.3)   | 361             | 2.01 (1.81-2.24) | 46              | 2.86 (2.04-3.88) | 30              | 2.45 (1.64-3.51) | 10               | 1.77 (0.84-3.26) |
| 2005                      | 483             | 2.22 (2.02-2.44) | 405             | 2.23 (2.02-2.47) | 44              | 2.34 (1.69-3.15) | 28              | 2.34 (1.52-3.42) | 6                | 1.19 (0.42-2.62) |
| 2006                      | 536             | 2.45 (2.24-2.67) | 443             | 2.42 (2.19-2.66) | 50              | 2.72 (1.99-3.62) | 32              | 2.72 (1.84-3.88) | 11               | 1.7 (0.84-3.06)  |
| 2007                      | 523             | 2.37 (2.16-2.58) | 427             | 2.3 (2.08-2.54)  | 51              | 2.78 (2.02-3.71) | 38              | 3.27 (2.27-4.54) | 7                | 1.28 (0.5-2.65)  |
| 2008                      | 566             | 2.49 (2.28-2.71) | 475             | 2.49 (2.26-2.73) | 40              | 2.15 (1.51-2.97) | 44              | 3.68 (2.63-5)    | 7                | 1.03 (0.4-2.15)  |
| 2009                      | 652             | 2.84 (2.62-3.08) | 552             | 2.87 (2.63-3.13) | 50              | 2.61 (1.91-3.48) | 40              | 3.28 (2.31-4.51) | 10               | 1.77 (0.83-3.28) |
| 2010                      | 585             | 2.49 (2.29-2.71) | 516             | 2.63 (2.4-2.87)  | 41              | 2.1 (1.48-2.87)  | 22              | 1.64 (1.03-2.49) | 6                | 1.06 (0.38-2.34) |
| 2011                      | 677             | 2.81 (2.6-3.03)  | 578             | 2.86 (2.63-3.11) | 48              | 2.34 (1.7-3.13)  | 37              | 2.84 (1.98-3.93) | 14               | 2.2 (1.18-3.72)  |
| 2012                      | 686             | 2.78 (2.57-3)    | 595             | 2.87 (2.64-3.12) | 50              | 2.41 (1.78-3.18) | 33              | 2.5 (1.7-3.54)   | 8                | 1.18 (0.5-2.34)  |
| 2013                      | 712             | 2.85 (2.64-3.07) | 575             | 2.73 (2.51-2.96) | 76              | 3.86 (3.01-4.86) | 44              | 3.13 (2.26-4.21) | 17               | 3.12 (1.73-5.14) |
| 2014                      | 744             | 2.86 (2.65-3.07) | 608             | 2.78 (2.56-3.02) | 71              | 3.23 (2.51-4.09) | 55              | 3.99 (3-5.21)    | 10               | 1.62 (0.73-3.06) |
| 2015                      | 773             | 2.92 (2.72-3.14) | 625             | 2.82 (2.6-3.05)  | 74              | 3.39 (2.64-4.28) | 56              | 4.05 (3.04-5.28) | 18               | 2.62 (1.54-4.16) |
| 2016                      | 805             | 2.97 (2.76-3.18) | 668             | 2.94 (2.72-3.17) | 90              | 4.06 (3.24-5.03) | 35              | 2.38 (1.65-3.32) | 12               | 1.68 (0.86-2.95) |
| 2017                      | 872             | 3.15 (2.95-3.37) | 743             | 3.2 (2.97-3.44)  | 70              | 3.05 (2.37-3.86) | 52              | 3.56 (2.65-4.67) | 7                | 1.00 (0.39-2.07) |
| Women                     |                 |                  |                 |                  |                 |                  |                 |                  |                  |                  |
| 1999                      | 348             | 1.22 (1.1-1.36)  | 279             | 1.17 (1.04-1.32) | 39              | 1.6 (1.13-2.18)  | 18              | 1.17 (0.69-1.86) | 12               | 1.82 (0.94-3.19) |
| 2000                      | 431             | 1.52 (1.37-1.67) | 337             | 1.41 (1.27-1.58) | 49              | 1.99 (1.47-2.64) | 33              | 2.13 (1.46-3)    | 12               | 1.77 (0.92-3.1)  |
| 2001                      | 476             | 1.66 (1.52-1.82) | 388             | 1.62 (1.46-1.79) | 55              | 2.23 (1.68-2.91) | 31              | 2.03 (1.37-2.89) | 2                | 0.31 (0.04-1.12) |
| 2002                      | 473             | 1.63 (1.48-1.78) | 401             | 1.65 (1.49-1.83) | 42              | 1.66 (1.19-2.24) | 22              | 1.39 (0.87-2.11) | 8                | 1.19 (0.51-2.34) |
| 2003                      | 463             | 1.6 (1.46-1.76)  | 381             | 1.57 (1.42-1.74) | 40              | 1.61 (1.15-2.2)  | 34              | 2.26 (1.56-3.17) | 8                | 1.21 (0.52-2.38) |
| 2004                      | 535             | 1.82 (1.67-1.98) | 425             | 1.72 (1.56-1.9)  | 65              | 2.55 (1.97-3.26) | 40              | 2.64 (1.88-3.6)  | 5                | 0.7 (0.22-1.65)  |
| 2005                      | 565             | 1.91 (1.75-2.07) | 464             | 1.87 (1.7-2.05)  | 51              | 1.98 (1.47-2.61) | 42              | 2.69 (1.93-3.64) | 8                | 1.08 (0.46-2.13) |
| 2006                      | 580             | 1.97 (1.81-2.13) | 478             | 1.94 (1.76-2.12) | 61              | 2.39 (1.83-3.07) | 37              | 2.39 (1.68-3.31) | 4                | 0.54 (0.15-1.38) |
| 2007                      | 629             | 2.12 (1.95-2.29) | 519             | 2.1 (1.92-2.29)  | 44              | 1.7 (1.23-2.28)  | 49              | 3.04 (2.24-4.03) | 17               | 2.26 (1.31-3.63) |
| 2008                      | 665             | 2.17 (2.01-2.34) | 563             | 2.2 (2.02-2.39)  | 52              | 1.94 (1.45-2.55) | 41              | 2.47 (1.76-3.36) | 9                | 1.15 (0.52-2.2)  |
| 2009                      | 737             | 2.4 (2.23-2.59)  | 626             | 2.44 (2.25-2.65) | 57              | 2.17 (1.64-2.81) | 47              | 2.84 (2.08-3.79) | 7                | 0.9 (0.36-1.87)  |
| 2010                      | 722             | 2.31 (2.15-2.49) | 637             | 2.45 (2.26-2.65) | 45              | 1.69 (1.23-2.26) | 36              | 2.13 (1.49-2.96) | 4                | 0.54 (0.14-1.38) |
| 2011                      | 772             | 2.46 (2.29-2.64) | 662             | 2.53 (2.34-2.74) | 61              | 2.21 (1.68-2.84) | 39              | 2.35 (1.66-3.22) | 10               | 1.23 (0.59-2.27) |
| 2012                      | 818             | 2.58 (2.4-2.76)  | 688             | 2.6 (2.4-2.8)    | 86              | 3.13 (2.5-3.87)  | 36              | 2.17 (1.51-3.01) | 8                | 0.95 (0.41-1.87) |
| 2013                      | 830             | 2.56 (2.38-2.74) | 667             | 2.47 (2.28-2.67) | 84              | 3 (2.39-3.71)    | 70              | 3.96 (3.08-5.01) | 9                | 1.06 (0.48-2.01) |
| 2014                      | 845             | 2.56 (2.39-2.74) | 704             | 2.55 (2.36-2.75) | 89              | 3.13 (2.51-3.85) | 40              | 2.43 (1.73-3.32) | 12               | 1.38 (0.71-2.41) |
| 2015                      | 908             | 2.72 (2.54-2.9)  | 740             | 2.64 (2.46-2.84) | 90              | 3.14 (2.52-3.87) | 62              | 3.58 (2.74-4.6)  | 16               | 1.85 (1.05-3)    |
| 2016                      | 914             | 2.72 (2.54-2.9)  | 757             | 2.68 (2.49-2.88) | 97              | 3.41 (2.76-4.16) | 40              | 2.32 (1.65-3.17) | 20               | 2.31 (1.41-3.58) |
| 2017                      | 979             | 2.87 (2.69-3.06) | 819             | 2.87 (2.68-3.08) | 107             | 3.65 (2.99-4.41) | 38              | 2.09 (1.48-2.88) | 15               | 1.77 (0.99-2.93) |

ASR, Age-standardised Rate; ASMR, Age-standardised Mortality Rate; CI, Confidence Interval

Table S5 Other and unspecified liver tumour incidence and incidence-based mortality rates, by nation, sex, subtype and year

| Year    | INCIDENCE       |      |             |                 |      |             |                 |      |             |                 |      |             |                  |      |             |
|---------|-----------------|------|-------------|-----------------|------|-------------|-----------------|------|-------------|-----------------|------|-------------|------------------|------|-------------|
|         | UK              |      |             | England         |      |             | Scotland        |      |             | Wales           |      |             | Northern Ireland |      |             |
|         | Number of Cases | ASR  | 95% CI      | Number of Cases | ASR  | 95% CI      | Number of Cases | ASR  | 95% CI      | Number of Cases | ASR  | 95% CI      | Number of Cases  | ASR  | 95% CI      |
| Persons |                 |      |             |                 |      |             |                 |      |             |                 |      |             |                  |      |             |
| 1997    | 367             | 0.76 | (0.68-0.84) | 313             | 0.77 | (0.69-0.86) | 19              | 0.45 | (0.27-0.7)  | 27              | 1.06 | (0.7-1.54)  | 8                | 0.69 | (0.3-1.36)  |
| 1998    | 359             | 0.74 | (0.66-0.82) | 291             | 0.72 | (0.64-0.81) | 30              | 0.76 | (0.5-1.09)  | 34              | 1.28 | (0.88-1.79) | 4                | 0.25 | (0.06-0.65) |
| 1999    | 415             | 0.85 | (0.77-0.94) | 350             | 0.86 | (0.77-0.96) | 28              | 0.65 | (0.43-0.95) | 32              | 1.21 | (0.82-1.71) | 5                | 0.37 | (0.11-0.89) |
| 2000    | 390             | 0.79 | (0.71-0.87) | 327             | 0.79 | (0.71-0.88) | 24              | 0.58 | (0.37-0.87) | 23              | 0.85 | (0.54-1.29) | 16               | 1.35 | (0.77-2.2)  |
| 2001    | 326             | 0.64 | (0.58-0.72) | 277             | 0.65 | (0.58-0.74) | 23              | 0.52 | (0.33-0.78) | 23              | 0.87 | (0.55-1.3)  | 3                | 0.2  | (0.04-0.6)  |
| 2002    | 350             | 0.69 | (0.62-0.76) | 310             | 0.72 | (0.64-0.81) | 14              | 0.33 | (0.18-0.56) | 23              | 0.88 | (0.55-1.33) | 3                | 0.19 | (0.04-0.56) |
| 2003    | 345             | 0.68 | (0.61-0.75) | 286             | 0.67 | (0.6-0.76)  | 24              | 0.58 | (0.37-0.87) | 24              | 0.85 | (0.54-1.27) | 11               | 0.76 | (0.37-1.37) |
| 2004    | 328             | 0.64 | (0.57-0.71) | 280             | 0.65 | (0.58-0.73) | 25              | 0.59 | (0.38-0.88) | 13              | 0.45 | (0.24-0.77) | 10               | 0.81 | (0.39-1.49) |
| 2005    | 351             | 0.68 | (0.61-0.76) | 303             | 0.7  | (0.63-0.79) | 23              | 0.52 | (0.33-0.79) | 16              | 0.55 | (0.31-0.9)  | 9                | 0.79 | (0.36-1.5)  |
| 2006    | 365             | 0.69 | (0.62-0.77) | 316             | 0.72 | (0.64-0.8)  | 25              | 0.57 | (0.37-0.84) | 16              | 0.56 | (0.32-0.92) | 8                | 0.63 | (0.27-1.24) |
| 2007    | 415             | 0.78 | (0.71-0.86) | 366             | 0.82 | (0.74-0.91) | 31              | 0.71 | (0.48-1.01) | 8               | 0.28 | (0.12-0.54) | 10               | 0.68 | (0.31-1.26) |
| 2008    | 503             | 0.94 | (0.86-1.03) | 455             | 1.02 | (0.93-1.12) | 24              | 0.52 | (0.33-0.78) | 18              | 0.62 | (0.37-0.98) | 6                | 0.41 | (0.15-0.9)  |
| 2009    | 512             | 0.94 | (0.86-1.02) | 475             | 1.04 | (0.95-1.14) | 16              | 0.36 | (0.2-0.58)  | 11              | 0.38 | (0.19-0.68) | 10               | 0.7  | (0.33-1.29) |
| 2010    | 582             | 1.05 | (0.96-1.13) | 518             | 1.11 | (1.02-1.21) | 25              | 0.54 | (0.35-0.8)  | 13              | 0.45 | (0.24-0.77) | 26               | 1.72 | (1.12-2.54) |
| 2011    | 504             | 0.88 | (0.81-0.97) | 430             | 0.9  | (0.82-0.99) | 24              | 0.48 | (0.31-0.72) | 27              | 0.9  | (0.59-1.32) | 23               | 1.62 | (1.01-2.45) |
| 2012    | 702             | 1.22 | (1.13-1.32) | 659             | 1.38 | (1.27-1.48) | 14              | 0.3  | (0.16-0.5)  | 21              | 0.68 | (0.42-1.05) | 8                | 0.48 | (0.2-0.96)  |
| 2013    | 833             | 1.44 | (1.34-1.54) | 786             | 1.62 | (1.51-1.74) | 20              | 0.41 | (0.25-0.63) | 21              | 0.66 | (0.41-1.02) | 6                | 0.4  | (0.14-0.88) |
| 2014    | 784             | 1.32 | (1.23-1.41) | 717             | 1.44 | (1.33-1.55) | 27              | 0.56 | (0.37-0.82) | 29              | 0.92 | (0.62-1.32) | 11               | 0.77 | (0.38-1.37) |
| 2015    | 611             | 1.01 | (0.93-1.09) | 551             | 1.08 | (1-1.18)    | 15              | 0.3  | (0.17-0.5)  | 31              | 1    | (0.68-1.42) | 14               | 0.95 | (0.52-1.59) |
| 2016    | 579             | 0.94 | (0.87-1.02) | 527             | 1.02 | (0.94-1.11) | 15              | 0.3  | (0.17-0.5)  | 26              | 0.81 | (0.53-1.19) | 11               | 0.69 | (0.34-1.24) |
| 2017    | 544             | 0.87 | (0.8-0.94)  | 492             | 0.94 | (0.86-1.02) | 19              | 0.37 | (0.22-0.57) | 21              | 0.65 | (0.4-1)     | 12               | 0.76 | (0.39-1.33) |
| Men     |                 |      |             |                 |      |             |                 |      |             |                 |      |             |                  |      |             |
| 1997    | 201             | 0.98 | (0.85-1.14) | 171             | 0.98 | (0.84-1.15) | 10              | 0.57 | (0.26-1.06) | 15              | 1.58 | (0.81-2.71) | 5                | 1    | (0.32-2.35) |
| 1998    | 218             | 1.05 | (0.91-1.21) | 179             | 1.02 | (0.87-1.18) | 21              | 1.55 | (0.84-2.53) | 15              | 1.23 | (0.68-2.04) | 3                | 0.36 | (0.06-1.09) |
| 1999    | 263             | 1.32 | (1.16-1.5)  | 218             | 1.31 | (1.13-1.51) | 19              | 1.05 | (0.62-1.66) | 24              | 2.38 | (1.47-3.62) | 2                | 0.21 | (0.02-0.77) |
| 2000    | 236             | 1.12 | (0.97-1.27) | 202             | 1.14 | (0.98-1.31) | 10              | 0.63 | (0.25-1.24) | 15              | 1.32 | (0.72-2.2)  | 9                | 1.69 | (0.77-3.22) |
| 2001    | 176             | 0.82 | (0.69-0.95) | 147             | 0.81 | (0.68-0.96) | 15              | 0.78 | (0.42-1.3)  | 12              | 1.14 | (0.54-2.07) | 2                | 0.27 | (0.03-0.96) |
| 2002    | 200             | 0.94 | (0.81-1.09) | 173             | 0.96 | (0.82-1.12) | 10              | 0.51 | (0.24-0.95) | 15              | 1.64 | (0.85-2.8)  | 2                | 0.29 | (0.04-1.05) |
| 2003    | 200             | 0.93 | (0.8-1.08)  | 163             | 0.91 | (0.77-1.07) | 13              | 0.88 | (0.43-1.57) | 18              | 1.45 | (0.85-2.31) | 6                | 0.88 | (0.31-1.95) |
| 2004    | 202             | 0.92 | (0.79-1.06) | 170             | 0.91 | (0.78-1.07) | 16              | 1.03 | (0.57-1.7)  | 10              | 0.75 | (0.36-1.38) | 6                | 1.24 | (0.44-2.74) |
| 2005    | 191             | 0.85 | (0.73-0.99) | 163             | 0.87 | (0.73-1.01) | 14              | 0.8  | (0.42-1.36) | 9               | 0.71 | (0.32-1.34) | 5                | 1.05 | (0.33-2.46) |
| 2006    | 201             | 0.92 | (0.8-1.07)  | 175             | 0.94 | (0.8-1.1)   | 12              | 0.7  | (0.33-1.26) | 10              | 1.07 | (0.47-2.04) | 4                | 0.74 | (0.2-1.91)  |
| 2007    | 258             | 1.12 | (0.98-1.27) | 230             | 1.19 | (1.03-1.35) | 21              | 1.25 | (0.72-1.98) | 2               | 0.16 | (0.02-0.59) | 5                | 0.7  | (0.18-1.74) |
| 2008    | 296             | 1.27 | (1.12-1.43) | 270             | 1.38 | (1.22-1.57) | 15              | 0.79 | (0.44-1.31) | 7               | 0.51 | (0.2-1.06)  | 4                | 0.62 | (0.17-1.6)  |
| 2009    | 290             | 1.19 | (1.06-1.34) | 267             | 1.31 | (1.16-1.48) | 13              | 0.64 | (0.34-1.1)  | 4               | 0.3  | (0.08-0.78) | 6                | 0.92 | (0.33-2.01) |
| 2010    | 327             | 1.33 | (1.18-1.48) | 292             | 1.41 | (1.25-1.59) | 16              | 0.78 | (0.44-1.27) | 8               | 0.61 | (0.26-1.2)  | 11               | 1.59 | (0.77-2.87) |
| 2011    | 289             | 1.17 | (1.03-1.31) | 248             | 1.19 | (1.04-1.35) | 18              | 0.88 | (0.52-1.4)  | 12              | 0.94 | (0.47-1.68) | 11               | 2    | (0.92-3.7)  |
| 2012    | 424             | 1.65 | (1.49-1.81) | 393             | 1.82 | (1.64-2.02) | 9               | 0.42 | (0.19-0.81) | 16              | 1.13 | (0.64-1.84) | 6                | 0.95 | (0.33-2.11) |
| 2013    | 485             | 1.92 | (1.75-2.11) | 456             | 2.16 | (1.96-2.37) | 13              | 0.62 | (0.31-1.08) | 12              | 0.81 | (0.41-1.42) | 4                | 0.63 | (0.17-1.63) |
| 2014    | 443             | 1.7  | (1.55-1.87) | 404             | 1.84 | (1.67-2.04) | 13              | 0.73 | (0.37-1.29) | 20              | 1.45 | (0.87-2.25) | 6                | 0.94 | (0.34-2.05) |
| 2015    | 323             | 1.2  | (1.07-1.34) | 284             | 1.24 | (1.1-1.4)   | 11              | 0.61 | (0.28-1.12) | 19              | 1.37 | (0.81-2.16) | 9                | 1.39 | (0.63-2.65) |
| 2016    | 337             | 1.24 | (1.11-1.38) | 299             | 1.3  | (1.15-1.46) | 12              | 0.63 | (0.31-1.12) | 19              | 1.3  | (0.78-2.05) | 7                | 1.1  | (0.4-2.35)  |
| 2017    | 294             | 1.03 | (0.91-1.15) | 262             | 1.09 | (0.96-1.23) | 13              | 0.58 | (0.3-1.01)  | 12              | 0.81 | (0.42-1.41) | 7                | 0.99 | (0.39-2.05) |
| Women   |                 |      |             |                 |      |             |                 |      |             |                 |      |             |                  |      |             |
| 1997    | 166             | 0.59 | (0.51-0.69) | 142             | 0.61 | (0.51-0.72) | 9               | 0.36 | (0.17-0.69) | 12              | 0.85 | (0.44-1.49) | 3                | 0.4  | (0.08-1.18) |
| 1998    | 141             | 0.49 | (0.42-0.58) | 112             | 0.47 | (0.39-0.57) | 9               | 0.37 | (0.17-0.7)  | 19              | 1.21 | (0.72-1.89) | 1                | 0.14 | (0-0.8)     |
| 1999    | 152             | 0.53 | (0.45-0.62) | 132             | 0.55 | (0.46-0.65) | 9               | 0.36 | (0.16-0.68) | 8               | 0.53 | (0.23-1.04) | 3                | 0.43 | (0.09-1.26) |
| 2000    | 154             | 0.53 | (0.45-0.62) | 125             | 0.51 | (0.43-0.61) | 14              | 0.57 | (0.31-0.95) | 8               | 0.5  | (0.21-0.98) | 7                | 1.02 | (0.41-2.11) |
| 2001    | 150             | 0.52 | (0.44-0.61) | 130             | 0.54 | (0.45-0.65) | 8               | 0.32 | (0.14-0.64) | 11              | 0.67 | (0.33-1.2)  | 1                | 0.14 | (0-0.8)     |
| 2002    | 150             | 0.5  | (0.42-0.59) | 137             | 0.55 | (0.46-0.65) | 4               | 0.17 | (0.05-0.43) | 8               | 0.52 | (0.22-1.02) | 1                | 0.09 | (0-0.52)    |
| 2003    | 145             | 0.5  | (0.42-0.59) | 123             | 0.5  | (0.42-0.6)  | 11              | 0.45 | (0.22-0.8)  | 6               | 0.41 | (0.15-0.89) | 5                | 0.62 | (0.19-1.45) |
| 2004    | 126             | 0.43 | (0.36-0.52) | 110             | 0.45 | (0.37-0.55) | 9               | 0.35 | (0.16-0.66) | 3               | 0.22 | (0.04-0.64) | 4                | 0.53 | (0.14-1.36) |
| 2005    | 160             | 0.55 | (0.46-0.64) | 140             | 0.57 | (0.48-0.68) | 9               | 0.34 | (0.16-0.66) | 7               | 0.41 | (0.16-0.86) | 4                | 0.59 | (0.16-1.51) |
| 2006    | 164             | 0.55 | (0.47-0.64) | 141             | 0.57 | (0.48-0.68) | 13              | 0.49 | (0.26-0.84) | 6               | 0.33 | (0.12-0.72) | 4                | 0.52 | (0.14-1.34) |
| 2007    | 157             | 0.52 | (0.44-0.61) | 136             | 0.54 | (0.45-0.64) | 10              | 0.37 | (0.18-0.68) | 6               | 0.39 | (0.14-0.84) | 5                | 0.68 | (0.22-1.6)  |
| 2008    | 207             | 0.68 | (0.59-0.78) | 185             | 0.74 | (0.63-0.85) | 9               | 0.33 | (0.15-0.62) | 11              | 0.66 | (0.32-1.18) | 2                | 0.2  | (0.02-0.74) |
| 2009    | 222             | 0.72 | (0.63-0.82) | 208             | 0.81 | (0.7-0.93)  | 3               | 0.12 | (0.02-0.35) | 7               | 0.38 | (0.15-0.78) | 4                | 0.48 | (0.13-1.24) |
| 2010    | 255             | 0.82 | (0.73-0.93) | 226             | 0.88 | (0.76-1)    | 9               | 0.33 | (0.15-0.63) | 5               | 0.34 | (0.11-0.78) | 15               | 1.81 | (1-3.01)    |
| 2011    | 215             | 0.66 | (0.58-0.76) | 182             | 0.67 | (0.58-0.78) | 6               | 0.21 | (0.08-0.46) | 15              | 0.9  | (0.5-1.49)  | 12               | 1.43 | (0.73-2.51) |
| 2012    | 278             | 0.87 | (0.77-0.97) | 266             | 0.99 | (0.88-1.12) | 5               | 0.18 | (0.06-0.43) | 5               | 0.29 | (0.09-0.69) | 2                | 0.19 | (0.02-0.68) |
| 2013    | 348             | 1.08 | (0.97-1.2)  | 330             | 1.23 | (1.1-1.37)  | 7               | 0.25 | (0.1-0.52)  | 9               | 0.5  | (0.23-0.96) | 2                | 0.2  | (0.02-0.74) |
| 2014    | 341             | 1.01 | (0.91-1.13) | 313             | 1.11 | (0.99-1.24) | 14              | 0.5  | (0.27-0.84) | 9               | 0.52 | (0.24-1)    | 5                | 0.59 | (0.19-1.38) |
| 2015    | 288             | 0.85 | (0.76-0.96) | 267             | 0.94 | (0.83-1.07) | 4               | 0.15 | (0.04-0.38) | 12              | 0.66 | (0.34-1.16) | 5                | 0.61 | (0.2-1.43)  |
| 2016    | 242             | 0.71 | (0.62-0.8)  | 228             | 0.8  | (0.7-0.91)  | 3               | 0.1  | (0.02-0.29) | 7               | 0.4  | (0.16-0.82) | 4                | 0.43 | (0.12-1.1)  |
| 2017    | 250             | 0.73 | (0.64-0.83) | 230             | 0.8  | (0.7-0.92)  | 6               | 0.21 | (0.08-0.46) | 9               | 0.52 | (0.24-1)    | 5                | 0.5  | (0.16-1.18) |

INCIDENCE-BASED MORTALITY

| Year    | UK                     |                  | England                |                  |    | Scotland         |                        |                  | Wales  |                        |      | Northern Ireland |            |                  |        |
|---------|------------------------|------------------|------------------------|------------------|----|------------------|------------------------|------------------|--------|------------------------|------|------------------|------------|------------------|--------|
|         | numbe<br>r of<br>Cases | AS               | numbe<br>r of<br>Cases | ASM              | R  | 95% CI           | numbe<br>r of<br>Cases | ASMR             | 95% CI | numbe<br>r of<br>Cases | ASMR | 95% CI           | Number ASM |                  |        |
|         |                        | MR               |                        | 95% CI           |    |                  |                        |                  |        |                        |      |                  | of Cases   | R                | 95% CI |
| Persons |                        |                  |                        |                  |    |                  |                        |                  |        |                        |      |                  |            |                  |        |
| 1999    | 248                    | 0.51 (0.45-0.58) | 206                    | 0.51 (0.44-0.59) | 21 | 0.51 (0.31-0.78) | 15                     | 0.58 (0.32-0.96) | 6      | 0.46 (0.16-1.02)       | 8    | 0.68 (0.29-1.35) | 0          | 0 (-)            |        |
| 2000    | 209                    | 0.43 (0.37-0.49) | 175                    | 0.43 (0.37-0.5)  | 14 | 0.34 (0.19-0.57) | 12                     | 0.46 (0.24-0.81) | 0      | 0 (-)                  | 0    | 0 (-)            | 0          | 0 (-)            |        |
| 2001    | 171                    | 0.35 (0.3-0.4)   | 151                    | 0.37 (0.31-0.43) | 12 | 0.27 (0.14-0.48) | 8                      | 0.3 (0.13-0.58)  | 0      | 0 (-)                  | 0    | 0 (-)            | 0          | 0 (-)            |        |
| 2002    | 180                    | 0.36 (0.31-0.42) | 162                    | 0.38 (0.33-0.45) | 5  | 0.12 (0.04-0.29) | 13                     | 0.49 (0.26-0.84) | 6      | 0.45 (0.16-0.99)       | 3    | 0.2 (0.04-0.6)   | 9          | 0.76 (0.34-1.46) |        |
| 2003    | 219                    | 0.44 (0.38-0.5)  | 186                    | 0.44 (0.38-0.51) | 12 | 0.3 (0.16-0.53)  | 15                     | 0.53 (0.29-0.87) | 5      | 0.33 (0.15-0.62)       | 3    | 0.22 (0.08-0.48) | 4          | 0.3 (0.08-0.76)  |        |
| 2004    | 190                    | 0.37 (0.32-0.43) | 166                    | 0.39 (0.33-0.46) | 15 | 0.35 (0.19-0.58) | 6                      | 0.2 (0.07-0.45)  | 9      | 0.32 (0.14-0.6)        | 5    | 0.22 (0.08-0.48) | 5          | 0.35 (0.11-0.83) |        |
| 2005    | 212                    | 0.41 (0.36-0.47) | 174                    | 0.41 (0.35-0.47) | 13 | 0.3 (0.16-0.51)  | 16                     | 0.56 (0.32-0.91) | 7      | 0.24 (0.1-0.49)        | 7    | 0.24 (0.1-0.49)  | 7          | 0.5 (0.2-1.03)   |        |
| 2006    | 191                    | 0.37 (0.32-0.42) | 162                    | 0.37 (0.32-0.44) | 15 | 0.33 (0.18-0.55) | 9                      | 0.33 (0.15-0.62) | 9      | 0.32 (0.14-0.6)        | 10   | 0.79 (0.38-1.46) | 11         | 0.76 (0.37-1.36) |        |
| 2007    | 239                    | 0.46 (0.4-0.52)  | 202                    | 0.46 (0.4-0.53)  | 28 | 0.65 (0.43-0.94) | 6                      | 0.22 (0.08-0.48) | 8      | 0.26 (0.11-0.51)       | 5    | 0.35 (0.11-0.82) | 8          | 0.58 (0.25-1.15) |        |
| 2008    | 267                    | 0.5 (0.45-0.57)  | 238                    | 0.54 (0.47-0.61) | 16 | 0.34 (0.2-0.56)  | 9                      | 0.32 (0.14-0.6)  | 13     | 0.43 (0.23-0.73)       | 5    | 0.33 (0.11-0.78) | 9          | 0.59 (0.27-1.13) |        |
| 2009    | 244                    | 0.45 (0.4-0.51)  | 219                    | 0.49 (0.42-0.56) | 14 | 0.29 (0.16-0.49) | 6                      | 0.22 (0.08-0.48) | 16     | 0.49 (0.28-0.79)       | 12   | 0.76 (0.39-1.32) |            |                  |        |
| 2010    | 277                    | 0.51 (0.45-0.57) | 244                    | 0.53 (0.47-0.61) | 19 | 0.43 (0.25-0.67) | 7                      | 0.24 (0.1-0.49)  |        |                        |      |                  |            |                  |        |
| 2011    | 268                    | 0.48 (0.43-0.55) | 236                    | 0.51 (0.44-0.58) | 13 | 0.28 (0.15-0.47) | 9                      | 0.31 (0.14-0.59) |        |                        |      |                  |            |                  |        |
| 2012    | 290                    | 0.51 (0.45-0.57) | 260                    | 0.54 (0.48-0.61) | 11 | 0.24 (0.12-0.42) | 8                      | 0.26 (0.11-0.51) |        |                        |      |                  |            |                  |        |
| 2013    | 415                    | 0.71 (0.65-0.79) | 389                    | 0.8 (0.72-0.88)  | 13 | 0.27 (0.14-0.46) | 8                      | 0.26 (0.11-0.52) |        |                        |      |                  |            |                  |        |
| 2014    | 456                    | 0.78 (0.71-0.85) | 410                    | 0.83 (0.75-0.92) | 17 | 0.36 (0.21-0.58) | 21                     | 0.65 (0.4-1)     |        |                        |      |                  |            |                  |        |
| 2015    | 336                    | 0.56 (0.5-0.62)  | 308                    | 0.61 (0.54-0.68) | 10 | 0.21 (0.1-0.38)  | 13                     | 0.43 (0.23-0.73) |        |                        |      |                  |            |                  |        |
| 2016    | 352                    | 0.57 (0.52-0.64) | 320                    | 0.62 (0.56-0.7)  | 10 | 0.21 (0.1-0.38)  | 13                     | 0.41 (0.22-0.7)  |        |                        |      |                  |            |                  |        |
| 2017    | 344                    | 0.56 (0.5-0.62)  | 303                    | 0.59 (0.52-0.66) | 13 | 0.27 (0.14-0.46) | 16                     | 0.49 (0.28-0.79) |        |                        |      |                  |            |                  |        |
| Men     |                        |                  |                        |                  |    |                  |                        |                  |        |                        |      |                  |            |                  |        |
| 1999    | 158                    | 0.82 (0.69-0.97) | 128                    | 0.79 (0.65-0.95) | 15 | 0.99 (0.5-1.71)  | 12                     | 1.24 (0.58-2.26) | 3      | 0.46 (0.06-1.44)       | 4    | 0.76 (0.2-1.96)  | 0          | 0 (-)            |        |
| 2000    | 129                    | 0.61 (0.51-0.73) | 110                    | 0.62 (0.51-0.75) | 8  | 0.42 (0.18-0.84) | 7                      | 0.68 (0.27-1.43) | 0      | 0 (-)                  | 0    | 0 (-)            | 0          | 0 (-)            |        |
| 2001    | 90                     | 0.43 (0.34-0.53) | 81                     | 0.47 (0.37-0.58) | 7  | 0.35 (0.14-0.72) | 2                      | 0.16 (0.02-0.58) | 9      | 1.04 (0.44-2.03)       | 4    | 0.62 (0.16-1.6)  | 2          | 0.32 (0.04-1.17) |        |
| 2002    | 100                    | 0.48 (0.38-0.58) | 87                     | 0.48 (0.38-0.6)  | 4  | 0.22 (0.06-0.58) | 9                      | 1.04 (0.44-2.03) | 5      | 1.06 (0.34-2.49)       | 3    | 0.49 (0.08-1.47) | 1          | 0.2 (0.01-1.11)  |        |
| 2003    | 139                    | 0.67 (0.56-0.8)  | 115                    | 0.67 (0.54-0.81) | 7  | 0.48 (0.18-1.02) | 13                     | 1.1 (0.58-1.89)  | 4      | 0.31 (0.08-0.78)       | 5    | 1.06 (0.34-2.49) | 3          | 0.49 (0.08-1.47) |        |
| 2004    | 113                    | 0.51 (0.42-0.62) | 99                     | 0.53 (0.43-0.65) | 8  | 0.52 (0.21-1.04) | 4                      | 0.31 (0.08-0.78) | 4      | 0.31 (0.08-0.78)       | 6    | 1.3 (0.43-2.9)   | 7          | 1.14 (0.44-2.37) |        |
| 2005    | 122                    | 0.56 (0.46-0.67) | 101                    | 0.55 (0.44-0.67) | 8  | 0.48 (0.2-0.96)  | 8                      | 0.63 (0.27-1.24) | 3      | 0.23 (0.05-0.67)       | 3    | 0.46 (0.09-1.36) | 3          | 0.49 (0.1-1.43)  |        |
| 2006    | 118                    | 0.54 (0.44-0.65) | 99                     | 0.53 (0.43-0.65) | 9  | 0.44 (0.2-0.84)  | 7                      | 0.84 (0.3-1.79)  | 4      | 0.31 (0.08-0.79)       | 4    | 0.31 (0.08-0.79) | 4          | 0.61 (0.16-1.56) |        |
| 2007    | 147                    | 0.67 (0.56-0.79) | 124                    | 0.66 (0.55-0.8)  | 18 | 1.18 (0.63-1.96) | 4                      | 0.31 (0.08-0.79) | 3      | 0.23 (0.05-0.67)       | 4    | 0.7 (0.18-1.82)  | 2          | 0.28 (0.03-1.02) |        |
| 2008    | 170                    | 0.76 (0.65-0.89) | 153                    | 0.82 (0.69-0.97) | 10 | 0.5 (0.23-0.92)  | 3                      | 0.23 (0.05-0.67) | 2      | 0.16 (0.02-0.59)       | 2    | 0.28 (0.03-1.02) | 3          | 0.45 (0.09-1.31) |        |
| 2009    | 142                    | 0.6 (0.5-0.71)   | 126                    | 0.64 (0.53-0.76) | 12 | 0.6 (0.31-1.05)  | 2                      | 0.16 (0.02-0.59) | 4      | 0.31 (0.09-0.81)       | 3    | 0.45 (0.09-1.31) | 6          | 1.3 (0.43-2.9)   |        |
| 2010    | 163                    | 0.69 (0.58-0.8)  | 145                    | 0.73 (0.61-0.86) | 11 | 0.54 (0.27-0.98) | 4                      | 0.31 (0.09-0.81) | 7      | 1.14 (0.44-2.37)       | 3    | 0.49 (0.1-1.43)  | 4          | 0.61 (0.16-1.56) |        |
| 2011    | 166                    | 0.71 (0.6-0.82)  | 144                    | 0.72 (0.61-0.85) | 12 | 0.6 (0.31-1.05)  | 4                      | 0.37 (0.08-0.98) | 3      | 0.23 (0.05-0.67)       | 8    | 1.05 (0.44-2.1)  |            |                  |        |
| 2012    | 158                    | 0.62 (0.53-0.73) | 140                    | 0.66 (0.55-0.78) | 8  | 0.4 (0.17-0.79)  | 3                      | 0.23 (0.05-0.67) |        |                        |      |                  |            |                  |        |
| 2013    | 245                    | 0.96 (0.84-1.09) | 228                    | 1.07 (0.93-1.22) | 9  | 0.41 (0.18-0.78) | 5                      | 0.38 (0.12-0.88) |        |                        |      |                  |            |                  |        |
| 2014    | 244                    | 0.94 (0.83-1.07) | 220                    | 1.01 (0.88-1.15) | 7  | 0.42 (0.15-0.88) | 14                     | 1.02 (0.55-1.73) |        |                        |      |                  |            |                  |        |
| 2015    | 192                    | 0.72 (0.62-0.83) | 176                    | 0.78 (0.67-0.91) | 6  | 0.35 (0.11-0.79) | 6                      | 0.47 (0.16-1.03) |        |                        |      |                  |            |                  |        |
| 2016    | 198                    | 0.73 (0.63-0.84) | 176                    | 0.77 (0.66-0.89) | 8  | 0.48 (0.19-0.97) | 9                      | 0.65 (0.29-1.24) |        |                        |      |                  |            |                  |        |
| 2017    | 191                    | 0.68 (0.58-0.78) | 164                    | 0.69 (0.59-0.8)  | 9  | 0.48 (0.21-0.94) | 10                     | 0.66 (0.31-1.21) |        |                        |      |                  |            |                  |        |
| Women   |                        |                  |                        |                  |    |                  |                        |                  |        |                        |      |                  |            |                  |        |
| 1999    | 90                     | 0.31 (0.25-0.38) | 78                     | 0.32 (0.26-0.41) | 6  | 0.24 (0.09-0.51) | 3                      | 0.21 (0.04-0.61) | 3      | 0.43 (0.09-1.26)       | 4    | 0.55 (0.15-1.42) | 0          | 0 (-)            |        |
| 2000    | 80                     | 0.27 (0.22-0.34) | 65                     | 0.27 (0.21-0.34) | 6  | 0.25 (0.09-0.54) | 5                      | 0.33 (0.11-0.76) | 0      | 0 (-)                  | 0    | 0 (-)            | 0          | 0 (-)            |        |
| 2001    | 81                     | 0.28 (0.22-0.35) | 70                     | 0.29 (0.23-0.37) | 5  | 0.2 (0.07-0.48)  | 6                      | 0.36 (0.13-0.79) | 2      | 0.11 (0.01-0.41)       | 2    | 0.29 (0.03-1.03) | 1          | 0.09 (0-0.53)    |        |
| 2002    | 80                     | 0.27 (0.21-0.34) | 75                     | 0.31 (0.24-0.38) | 1  | 0.04 (0-0.24)    | 4                      | 0.24 (0.06-0.61) | 8      | 0.51 (0.22-1.01)       | 4    | 0.55 (0.15-1.42) | 2          | 0.24 (0.03-0.87) |        |
| 2003    | 80                     | 0.27 (0.21-0.34) | 71                     | 0.29 (0.22-0.36) | 5  | 0.21 (0.07-0.48) | 2                      | 0.11 (0.01-0.41) | 2      | 0.12 (0.01-0.45)       | 2    | 0.26 (0.03-0.93) | 0          | 0 (-)            |        |
| 2004    | 77                     | 0.26 (0.21-0.33) | 67                     | 0.28 (0.21-0.35) | 7  | 0.26 (0.1-0.53)  | 2                      | 0.14 (0.02-0.52) | 3      | 0.34 (0.12-0.75)       | 3    | 0.34 (0.07-0.99) | 4          | 0.49 (0.13-1.27) |        |
| 2005    | 90                     | 0.31 (0.25-0.38) | 73                     | 0.3 (0.23-0.38)  | 5  | 0.19 (0.06-0.45) | 8                      | 0.51 (0.22-1.01) | 4      | 0.22 (0.06-0.58)       | 4    | 0.49 (0.13-1.27) | 4          | 0.49 (0.13-1.27) |        |
| 2006    | 73                     | 0.25 (0.19-0.31) | 63                     | 0.26 (0.2-0.33)  | 6  | 0.24 (0.09-0.52) | 2                      | 0.1 (0.01-0.37)  | 5      | 0.28 (0.09-0.65)       | 2    | 0.23 (0.03-0.83) | 5          | 0.59 (0.19-1.38) |        |
| 2007    | 92                     | 0.3 (0.24-0.37)  | 78                     | 0.31 (0.25-0.39) | 10 | 0.36 (0.17-0.66) | 2                      | 0.12 (0.01-0.45) | 7      | 0.39 (0.16-0.81)       | 1    | 0.12 (0-0.65)    | 4          | 0.46 (0.12-1.19) |        |
| 2008    | 97                     | 0.32 (0.26-0.39) | 85                     | 0.34 (0.27-0.42) | 6  | 0.22 (0.08-0.47) | 6                      | 0.34 (0.12-0.75) | 6      | 0.35 (0.13-0.77)       | 4    | 0.41 (0.11-1.05) |            |                  |        |
| 2009    | 102                    | 0.33 (0.26-0.4)  | 93                     | 0.36 (0.29-0.44) | 2  | 0.07 (0.01-0.26) | 4                      | 0.22 (0.06-0.58) |        |                        |      |                  |            |                  |        |
| 2010    | 114                    | 0.36 (0.3-0.44)  | 99                     | 0.38 (0.3-0.46)  | 8  | 0.31 (0.13-0.61) | 3                      | 0.19 (0.04-0.57) |        |                        |      |                  |            |                  |        |
| 2011    | 102                    | 0.32 (0.26-0.38) | 92                     | 0.34 (0.27-0.42) | 1  | 0.03 (0-0.18)    | 5                      | 0.28 (0.09-0.67) |        |                        |      |                  |            |                  |        |
| 2012    | 132                    | 0.4 (0.34-0.48)  | 120                    | 0.44 (0.36-0.53) | 3  | 0.11 (0.02-0.33) | 5                      | 0.28 (0.09-0.65) |        |                        |      |                  |            |                  |        |
| 2013    | 170                    | 0.52 (0.44-0.6)  | 161                    | 0.59 (0.5-0.69)  | 4  | 0.14 (0.04-0.37) | 3                      | 0.16 (0.03-0.48) |        |                        |      |                  |            |                  |        |
| 2014    | 212                    | 0.64 (0.56-0.74) | 190                    | 0.69 (0.6-0.8)   | 10 | 0.36 (0.17-0.66) | 7                      | 0.39 (0.16-0.81) |        |                        |      |                  |            |                  |        |
| 2015    | 144                    | 0.42 (0.36-0.5)  | 132                    | 0.46 (0.39-0.55) | 4  | 0.15 (0.04-0.39) | 7                      | 0.36 (0.14-0.73) |        |                        |      |                  |            |                  |        |
| 2016    | 154                    | 0.45 (0.38-0.53) | 144                    | 0.51 (0.43-0.6)  | 2  | 0.07 (0.01-0.25) | 4                      | 0.19 (0.05-0.49) |        |                        |      |                  |            |                  |        |
| 2017    | 153                    | 0.45 (0.38-0.52) | 139                    | 0.49 (0.41-0.58) | 4  | 0.14 (0.04-0.36) | 6                      | 0.35 (0.13-0.77) |        |                        |      |                  |            |                  |        |

ASR, Age-standardised Rate; ASMR, Age-standardised Mortality Rate; CI, Confidence Interval

Table S6 Primary liver cancer one-year age-standardised net-survival by nation, sex, subtype and 5-year cohort

| PLC            | Cohort               | UK    |          |             |          | England |          |             |          | Scotland |          |             |          | Wales |          |             |          | Northern Ireland |          |             |          |
|----------------|----------------------|-------|----------|-------------|----------|---------|----------|-------------|----------|----------|----------|-------------|----------|-------|----------|-------------|----------|------------------|----------|-------------|----------|
|                |                      | Net   |          |             |          | Net     |          |             |          | Net      |          |             |          | Net   |          |             |          | Net              |          |             |          |
|                |                      | N     | Survival | 95% CI      | suppress | N       | Survival | 95% CI      | suppress | N        | Survival | 95% CI      | suppress | N     | Survival | 95% CI      | suppress | N                | Survival | 95% CI      | suppress |
| <b>Persons</b> | <b>1997-2001</b>     | 11036 | 21.7     | (20.9-22.5) |          | 9001    | 21.4     | (20.5-22.3) |          | 1177     | 25.4     | (22.8-28)   |          | 632   | 20.7     | (17.5-24)   |          | 226              | 18.6     | (13.8-24.1) |          |
|                | <b>1998-2002</b>     | 11576 | 22.5     | (21.7-23.3) |          | 9492    | 22.3     | (21.5-23.2) |          | 1201     | 25       | (22.5-27.5) |          | 653   | 21.9     | (18.8-25.3) |          | 230              | 17.5     | (12.8-22.8) |          |
|                | <b>1999-2003</b>     | 12039 | 23.4     | (22.6-24.2) |          | 9879    | 23.2     | (22.3-24.1) |          | 1246     | 26.3     | (23.9-28.9) |          | 679   | 22.6     | (19.5-25.9) |          | 235              | 19       | (14.2-24.4) |          |
|                | <b>2000-2004</b>     | 12522 | 24.1     | (23.4-24.9) |          | 10250   | 23.8     | (23-24.7)   |          | 1340     | 27.8     | (25.4-30.3) |          | 696   | 24.4     | (21.2-27.8) |          | 236              | 19.3     | (14.5-24.7) |          |
|                | <b>2001-2005</b>     | 13050 | 24.5     | (23.7-25.2) |          | 10674   | 24.2     | (23.4-25.1) |          | 1414     | 27.4     | (25.1-29.9) |          | 721   | 24.1     | (20.9-27.3) |          | 241              | 21.4     | (16.4-26.9) |          |
|                | <b>2002-2006</b>     | 13905 | 25.6     | (24.8-26.3) |          | 11340   | 25.4     | (24.6-26.3) |          | 1509     | 28.4     | (26-30.7)   |          | 758   | 24.4     | (21.3-27.6) |          | 298              | 20.9     | (16.4-25.8) |          |
|                | <b>2003-2007</b>     | 14771 | 26.4     | (25.7-27.1) |          | 11986   | 26.3     | (25.5-27.2) |          | 1646     | 28.5     | (26.3-30.8) |          | 825   | 24.3     | (21.3-27.3) |          | 314              | 22.8     | (18.2-27.7) |          |
|                | <b>2004-2008</b>     | 15828 | 27.6     | (26.9-28.3) |          | 12844   | 27.6     | (26.8-28.3) |          | 1727     | 30       | (27.8-32.3) |          | 916   | 25.0     | (22.2-27.9) |          | 341              | 23.9     | (19.4-28.6) |          |
|                | <b>2005-2009</b>     | 17197 | 29.1     | (28.4-29.8) |          | 14054   | 29       | (28.2-29.8) |          | 1794     | 31.8     | (29.6-34)   |          | 968   | 26.8     | (24-29.7)   |          | 381              | 28.3     | (23.8-33)   |          |
|                | <b>2006-2010</b>     | 18525 | 30.8     | (30.1-31.4) |          | 15225   | 30.7     | (29.9-31.4) |          | 1889     | 33.1     | (30.9-35.3) |          | 1003  | 28.8     | (26-31.7)   |          | 408              | 28.5     | (24.2-33.1) |          |
|                | <b>2007-2011</b>     | 19731 | 32.1     | (31.4-32.8) |          | 16185   | 31.7     | (31-32.5)   |          | 2018     | 34.7     | (32.6-36.9) |          | 1097  | 32.8     | (29.9-35.6) |          | 431              | 32.5     | (28.1-37.1) |          |
|                | <b>2008-2012</b>     | 21132 | 33.8     | (33.2-34.5) |          | 17337   | 33.2     | (32.5-33.9) |          | 2164     | 37.8     | (35.7-40)   |          | 1175  | 35.6     | (32.8-38.4) |          | 456              | 35.7     | (31.2-40.2) |          |
|                | <b>2009-2013</b>     | 23006 | 35.5     | (34.9-36.2) |          | 18835   | 34.8     | (34.1-35.5) |          | 2413     | 40.3     | (38.3-42.3) |          | 1254  | 36.5     | (33.8-39.2) |          | 504              | 38.5     | (34.1-42.9) |          |
|                | <b>2010-2014</b>     | 24670 | 37.4     | (36.8-38.1) |          | 20161   | 36.9     | (36.2-37.5) |          | 2644     | 41.3     | (39.3-43.2) |          | 1310  | 37.9     | (35.2-40.6) |          | 555              | 38.4     | (34.2-42.6) |          |
|                | <b>2011-2015</b>     | 26343 | 39.1     | (38.5-39.7) |          | 21402   | 38.6     | (37.9-39.3) |          | 2873     | 43.7     | (41.8-45.5) |          | 1463  | 37.5     | (35-40)     |          | 605              | 39.8     | (35.7-43.7) |          |
|                | <b>2012-2016</b>     | 27984 | 39.8     | (39.2-40.4) |          | 22840   | 39.4     | (38.7-40)   |          | 3025     | 44.1     | (42.3-46)   |          | 1487  | 37.7     | (35.2-40.3) |          | 632              | 39.5     | (35.6-43.4) |          |
|                | <b>2013-2017</b>     | 29029 | 40.6     | (40-41.2)   |          | 23773   | 40.2     | (39.6-40.9) |          | 3107     | 44.6     | (42.8-46.4) |          |       |          |             | ShortFU  | 656              | 39.9     | (36-43.7)   |          |
|                | <b>Total Change*</b> |       | 18.9     |             |          | 18.8    |          |             |          | 19.2     |          |             |          | 17.0  |          |             |          | 21.3             |          |             |          |
| <b>Males</b>   | <b>1997-2001</b>     | 6668  | 20.8     | (19.8-21.8) |          | 5475    | 20.4     | (19.3-21.5) |          | 710      | 25       | (21.8-28.4) |          | 362   | 18.3     | (14.5-22.6) |          | 121              | 19.2     | (12.6-26.9) |          |
|                | <b>1998-2002</b>     | 7071  | 21.6     | (20.6-22.5) |          | 5838    | 21.4     | (20.3-22.4) |          | 727      | 24.5     | (21.4-27.8) |          | 377   | 21.1     | (17.1-25.5) |          | 129              | 13.6     | (8.3-20.3)  |          |
|                | <b>1999-2003</b>     | 7428  | 22.4     | (21.4-23.4) |          | 6135    | 22.3     | (21.2-23.3) |          | 759      | 24.8     | (21.4-27.7) |          | 397   | 22.2     | (18.1-26.5) |          | 137              | 16.3     | (10.6-23.2) |          |
|                | <b>2000-2004</b>     | 7726  | 23.3     | (22.4-24.3) |          | 6354    | 23.2     | (22.1-24.3) |          | 823      | 25.1     | (22.1-28.2) |          | 402   | 23.7     | (19.6-28.1) |          | 147              | 16.3     | (10.8-23)   |          |
|                | <b>2001-2005</b>     | 8072  | 24.0     | (23-24.9)   |          | 6619    | 23.9     | (22.8-24.9) |          | 884      | 25.6     | (22.7-28.6) |          | 411   | 24.2     | (20.1-28.6) |          | 158              | 17.5     | (12-24)     |          |
|                | <b>2002-2006</b>     | 8690  | 25.1     | (24.2-26.1) |          | 7094    | 25.1     | (24.1-26.2) |          | 960      | 27       | (24.2-30)   |          | 443   | 24.1     | (20.2-28.3) |          | 193              | 18.2     | (13-24.1)   |          |
|                | <b>2003-2007</b>     | 9275  | 26.4     | (25.5-27.3) |          | 7520    | 26.4     | (25.4-27.5) |          | 1065     | 27.8     | (25.1-30.6) |          | 486   | 24.7     | (20.9-28.7) |          | 204              | 22.2     | (16.7-28.3) |          |
|                | <b>2004-2008</b>     | 9984  | 28.0     | (27.1-28.9) |          | 8088    | 27.9     | (26.9-28.9) |          | 1135     | 30.3     | (27.6-33.1) |          | 539   | 25.4     | (21.7-29.2) |          | 222              | 23.8     | (18.3-29.7) |          |
|                | <b>2005-2009</b>     | 10911 | 29.4     | (28.5-30.2) |          | 8866    | 29       | (28-30)     |          | 1205     | 32.9     | (30.2-35.6) |          | 586   | 28.2     | (24.5-32)   |          | 254              | 28.6     | (23.1-34.4) |          |
|                | <b>2006-2010</b>     | 11784 | 31.3     | (30.5-32.2) |          | 9610    | 31.2     | (30.2-32.1) |          | 1286     | 33.6     | (30.9-36.3) |          | 619   | 29.8     | (26.2-33.5) |          | 269              | 29.5     | (24.1-35.2) |          |
|                | <b>2007-2011</b>     | 12580 | 32.8     | (32-33.6)   |          | 10222   | 32.4     | (31.5-33.3) |          | 1383     | 35.4     | (32.8-38)   |          | 688   | 33.7     | (30.1-37.4) |          | 287              | 33.1     | (27.6-38.7) |          |
|                | <b>2008-2012</b>     | 13545 | 34.6     | (33.8-35.4) |          | 10995   | 33.9     | (33-34.8)   |          | 1473     | 39.4     | (36.9-42)   |          | 756   | 35.9     | (32.4-39.4) |          | 321              | 35.6     | (30.2-40.9) |          |
|                | <b>2009-2013</b>     | 14800 | 36.4     | (35.6-37.2) |          | 11978   | 35.7     | (34.8-36.5) |          | 1659     | 41.5     | (39.1-44)   |          | 809   | 36.8     | (33.4-40.3) |          | 354              | 38.1     | (32.9-43.3) |          |
|                | <b>2010-2014</b>     | 15998 | 38.7     | (37.9-39.4) |          | 12953   | 38.2     | (37.3-39.1) |          | 1807     | 41.7     | (39.4-44)   |          | 859   | 38.4     | (35.1-41.8) |          | 379              | 39.1     | (34-44.1)   |          |
|                | <b>2011-2015</b>     | 17122 | 40.4     | (39.6-41.2) |          | 13782   | 39.9     | (39-40.7)   |          | 1957     | 45.5     | (43.2-47.7) |          | 979   | 38.1     | (34.9-41.2) |          | 404              | 40.1     | (35.1-44.9) |          |
|                | <b>2012-2016</b>     | 18299 | 41.0     | (40.3-41.7) |          | 14815   | 40.4     | (39.6-41.3) |          | 2057     | 46.2     | (43.9-48.4) |          | 1011  | 39.8     | (36.7-42.9) |          | 416              | 40.3     | (35.4-45.1) |          |
|                | <b>2013-2017</b>     | 19027 | 41.9     | (41.2-42.6) |          | 15480   | 41.5     | (40.7-42.3) |          | 2122     | 46.4     | (44.2-48.6) |          |       |          |             | ShortFU  | 420              | 40.8     | (35.9-45.6) |          |
|                | <b>Total Change*</b> |       | 21.1     |             |          | 21.1    |          |             |          | 21.4     |          |             |          | 21.5  |          |             |          | 21.6             |          |             |          |
| <b>Females</b> | <b>1997-2001</b>     | 4368  | 24.1     | (22.8-25.4) |          | 3526    | 23.9     | (22.5-25.4) |          | 467      | 26.5     | (22.5-30.6) |          | 270   | 24.2     | (19.2-29.5) |          | 105              | 16.8     | (10.3-24.7) |          |
|                | <b>1998-2002</b>     | 4505  | 24.8     | (23.5-26.1) |          | 3654    | 24.9     | (23.4-26.3) |          | 474      | 26       | (22-30.1)   |          | 276   | 23.2     | (18.3-28.4) |          | 101              | 21.8     | (14.2-30.5) |          |
|                | <b>1999-2003</b>     | 4611  | 26.0     | (24.7-27.3) |          | 3744    | 25.7     | (24.3-27.2) |          | 487      | 30.1     | (26-34.4)   |          | 282   | 23.7     | (18.8-28.9) |          | 98               | 24.2     | (16.1-33.3) |          |
|                | <b>2000-2004</b>     | 4796  | 26.4     | (25.1-27.7) |          | 3896    | 25.8     | (24.4-27.2) |          | 517      | 32.3     | (28.2-36.5) |          | 294   | 26.1     | (21.2-31.4) |          | 89               | 26.7     | (17.9-36.5) |          |
|                | <b>2001-2005</b>     | 4978  | 26.1     | (24.9-27.4) |          | 4055    | 25.6     | (24.3-27)   |          | 530      | 31.2     | (27.2-35.3) |          | 310   | 25.3     | (20.5-30.3) |          | 83               | 32       | (22.1-42.4) |          |
|                | <b>2002-2006</b>     | 5215  | 27.0     | (25.7-28.2) |          | 4246    | 26.6     | (25.2-28)   |          | 549      | 31.9     | (27.9-35.9) |          | 315   | 25.6     | (20.8-30.6) |          | 105              | 28.4     | (20-37.4)   |          |
|                | <b>2003-2007</b>     | 5496  | 26.8     | (25.6-28)   |          | 4466    | 26.7     | (25.3-28)   |          | 581      | 30.6     | (26.8-34.5) |          | 339   | 24.3     | (19.8-29.1) |          | 110              | 19.2     | (12.4-27.2) |          |
|                | <b>2004-2008</b>     | 5844  | 27.1     | (26-28.3)   |          | 4756    | 27.1     | (25.8-28.4) |          | 592      | 29.8     | (26-33.6)   |          | 377   | 25.3     | (21-29.9)   |          | 119              | 19.2     | (12.6-26.8) |          |
|                | <b>2005-2009</b>     | 6286  | 29.1     | (27.9-30.2) |          | 5188    | 29.2     | (28-30.5)   |          | 589      | 30.2     | (26.4-34)   |          | 382   | 25.8     | (21.5-30.4) |          | 127              | 27.3     | (19.8-35.4) |          |
|                | <b>2006-2010</b>     | 6741  | 30.0     | (28.9-31.1) |          | 5615    | 30       | (28.7-31.2) |          | 603      | 33       | (29.2-36.9) |          | 384   | 27.5     | (23-32.1)   |          | 139              | 27       | (19.8-34.7) |          |
|                | <b>2007-2011</b>     | 7151  | 31.1     | (30-32.2)   |          | 5963    | 30.7     | (29.5-31.9) |          | 635      | 33.7     | (30-37.5)   |          | 409   | 31.5     | (26.9-36.1) |          | 144              | 32.4     | (24.8-40.3) |          |
|                | <b>2008-2012</b>     | 7587  | 32.5     | (31.5-33.6) |          | 6342    | 32.1     | (30.9-33.2) |          | 691      | 34.8     | (31.2-38.5) |          | 419   | 35.2     | (30.5-39.9) |          | 135              | 37.8     | (29.5-46.1) |          |
|                | <b>2009-2013</b>     | 8206  | 34.2     | (33.2-35.3) |          | 6857    | 33.6     | (32.4-34.7) |          | 754      | 38.3     | (34.7-41.8) |          | 445   | 36.3     | (31.8-41)   |          | 150              | 40.2     | (32.2-48.2) |          |
|                | <b>2010-2014</b>     | 8672  | 35.2     | (34.1-36.2) |          | 7208    | 34.4     | (33.3-35.6) |          | 837      | 40.4     | (36.9-43.8) |          | 451   | 36.2     | (31.6-40.7) |          | 176              | 37.7     | (30.4-45.1) |          |
|                | <b>2011-2015</b>     | 9221  | 36.6     | (35.6-37.6) |          | 7620    | 36.2     | (35.1-37.3) |          | 916      | 40       | (36.8-43.3) |          | 484   | 36.0     | (31.6-40.4) |          | 201              | 40       | (33.1-46.9) |          |
|                | <b>2012-2016</b>     | 9685  | 37.7     | (36.7-38.7) |          | 8025    | 37.6     | (36.5-38.7) |          | 968      | 40       | (36.8-43.2) |          | 476   | 33.7     | (29.4-38.1) |          | 216              | 38.4     | (31.8-45)   |          |
|                | <b>2013-2017</b>     | 10002 | 38.1     | (37.1-39.1) |          | 8293    | 37.9     | (36.8-39)   |          | 985      | 40.8     | (37.6-43.9) |          |       |          |             | ShortFU  | 236              | 38.7     | (32.4-45.1) |          |
|                | <b>Total Change*</b> |       | 14.0     |             |          | 14.0    |          |             |          | 14.3     |          |             |          | 9.5   |          |             |          | 21.9             |          |             |          |

| HCC           |           | UK       |      |             |       | England  |             |          |      | Scotland    |      |          |             | Wales    |      |             |   | Northern Ireland |    |          |  |
|---------------|-----------|----------|------|-------------|-------|----------|-------------|----------|------|-------------|------|----------|-------------|----------|------|-------------|---|------------------|----|----------|--|
| Cohort        | N         | Net      |      | suppress    | N     | Net      |             | suppress | N    | Net         |      | suppress | N           | Net      |      | suppress    | N | Net              |    | suppress |  |
|               |           | Survival | CI   |             |       | Survival | CI          |          |      | Survival    | CI   |          |             | Survival | CI   |             |   | Survival         | CI |          |  |
| Persons       | 1997-2001 | 4757     | 23.7 | (22.5-24.9) | 3865  | 23.6     | (22.3-25)   | 564      | 27.3 | (23.6-31.1) | 239  | 17.8     | (13.2-23)   | 89       | 21.1 | (13.2-30.3) |   |                  |    |          |  |
|               | 1998-2002 | 5157     | 24.3 | (23.1-25.5) | 4212  | 24.4     | (23.1-25.7) | 581      | 26.8 | (23.2-30.5) | 255  | 19.0     | (14.4-24.2) | 109      | 20.5 | (13.4-28.7) |   |                  |    |          |  |
|               | 1999-2003 | 5515     | 25.3 | (24.1-26.5) | 4489  | 25.4     | (24.1-26.7) | 642      | 27.1 | (23.6-30.7) | 265  | 19.6     | (15-24.7)   | 119      | 23.6 | (16.2-31.7) |   |                  |    |          |  |
|               | 2000-2004 | 5812     | 26.3 | (25.1-27.5) | 4695  | 26.1     | (24.9-27.4) | 724      | 28.4 | (25.1-31.8) | 274  | 22.5     | (17.6-27.7) | 119      | 27.6 | (19.7-36)   |   |                  |    |          |  |
|               | 2001-2005 | 6215     | 26.7 | (25.6-27.8) | 5008  | 26.6     | (25.3-27.8) | 779      | 29.3 | (26.1-32.6) | 291  | 22.8     | (18.1-27.9) | 137      | 26   | (18.8-33.7) |   |                  |    |          |  |
|               | 2002-2006 | 6672     | 27.9 | (26.8-29)   | 5349  | 27.8     | (26.6-29.1) | 855      | 30.2 | (27.1-33.4) | 318  | 23.4     | (18.8-28.3) | 150      | 27.3 | (20.3-34.8) |   |                  |    |          |  |
|               | 2003-2007 | 7210     | 29.2 | (28.1-30.3) | 5734  | 29.2     | (28-30.4)   | 948      | 30.6 | (27.6-33.6) | 357  | 25.1     | (20.7-29.8) | 171      | 31.4 | (24.4-38.6) |   |                  |    |          |  |
|               | 2004-2008 | 7729     | 30.9 | (29.8-31.9) | 6097  | 30.9     | (29.7-32.1) | 1020     | 33.3 | (30.3-36.3) | 419  | 26.4     | (22.2-30.8) | 193      | 29.8 | (23.3-36.5) |   |                  |    |          |  |
|               | 2005-2009 | 8455     | 32.6 | (31.5-33.6) | 6679  | 32.5     | (31.3-33.6) | 1089     | 35.6 | (32.7-38.5) | 461  | 29.7     | (25.5-34)   | 226      | 32.1 | (26-38.3)   |   |                  |    |          |  |
|               | 2006-2010 | 9200     | 34.8 | (33.8-35.8) | 7268  | 34.9     | (33.8-36)   | 1189     | 36   | (33.2-38.8) | 500  | 31.9     | (27.8-36.1) | 243      | 32.8 | (26.8-38.8) |   |                  |    |          |  |
|               | 2007-2011 | 9968     | 36.6 | (35.6-37.6) | 7829  | 36.3     | (35.2-37.4) | 1295     | 38.6 | (35.9-41.3) | 575  | 36.9     | (32.9-41)   | 269      | 35.8 | (30-41.7)   |   |                  |    |          |  |
|               | 2008-2012 | 10726    | 38.8 | (37.8-39.7) | 8402  | 38.1     | (37-39.2)   | 1408     | 42.8 | (40.2-45.5) | 627  | 39.2     | (35.2-43.1) | 289      | 38.6 | (32.8-44.3) |   |                  |    |          |  |
|               | 2009-2013 | 11930    | 40.4 | (39.5-41.4) | 9332  | 39.6     | (38.6-40.6) | 1586     | 45.7 | (43.2-48.2) | 681  | 40.1     | (36.3-43.9) | 331      | 41.7 | (36.3-47.1) |   |                  |    |          |  |
|               | 2010-2014 | 13053    | 42.7 | (41.8-43.6) | 10239 | 42.1     | (41.2-43.1) | 1736     | 46.4 | (43.9-48.8) | 709  | 41.3     | (37.5-45)   | 369      | 43.3 | (38.1-48.4) |   |                  |    |          |  |
|               | 2011-2015 | 14146    | 45.0 | (44.1-45.8) | 11065 | 44.3     | (43.4-45.3) | 1880     | 50.3 | (47.9-52.6) | 798  | 42.1     | (38.6-45.6) | 403      | 46   | (40.9-50.9) |   |                  |    |          |  |
|               | 2012-2016 | 15283    | 45.8 | (45-46.6)   | 12049 | 45.1     | (44.2-46.1) | 1998     | 51.9 | (49.6-54.1) | 808  | 42.0     | (38.5-45.5) | 428      | 44.6 | (39.7-49.3) |   |                  |    |          |  |
|               | 2013-2017 | 16091    | 46.7 | (45.9-47.5) | 12781 | 46.2     | (45.3-47.1) | 2052     | 52.4 | (50.1-54.6) |      |          | ShortFU     | 432      | 45.4 | (40.5-50.1) |   |                  |    |          |  |
| Total Change* |           | 23.0     |      |             | 22.6  |          |             | 25.1     |      |             | 24.2 |          |             | 24.3     |      |             |   |                  |    |          |  |
| Males         | 1997-2001 | 3531     | 22.7 | (21.3-24.1) | 2873  | 22.4     | (20.9-24)   | 427      | 26.8 | (22.5-31.2) | 170  | 16.8     | (11.5-22.9) | 61       | 17.8 | (9.3-28.7)  |   |                  |    |          |  |
|               | 1998-2002 | 3869     | 23.6 | (22.3-25)   | 3173  | 23.5     | (22-25)     | 442      | 27.1 | (22.9-31.4) | 178  | 19.2     | (13.7-25.4) | 76       | 17.6 | (9.9-27.2)  |   |                  |    |          |  |
|               | 1999-2003 | 4167     | 24.5 | (23.2-25.9) | 3409  | 24.4     | (23-25.9)   | 485      | 27   | (23-31.1)   | 189  | 20.4     | (14.9-26.6) | 84       | 18.7 | (11.1-28)   |   |                  |    |          |  |
|               | 2000-2004 | 4435     | 25.4 | (24.1-26.7) | 3602  | 25.3     | (23.9-26.8) | 550      | 26.7 | (23-30.5)   | 198  | 22.2     | (16.6-28.4) | 85       | 21.9 | (13.7-31.5) |   |                  |    |          |  |
|               | 2001-2005 | 4725     | 26.0 | (24.7-27.3) | 3828  | 25.9     | (24.5-27.4) | 594      | 28.2 | (24.5-31.9) | 204  | 23.2     | (17.5-29.3) | 99       | 20   | (12.6-28.6) |   |                  |    |          |  |
|               | 2002-2006 | 5138     | 27.2 | (26-28.5)   | 4152  | 27.3     | (25.9-28.7) | 646      | 28.7 | (25.2-32.3) | 229  | 24.3     | (18.9-30.2) | 111      | 23.7 | (16.1-32.1) |   |                  |    |          |  |
|               | 2003-2007 | 5568     | 28.6 | (27.4-29.8) | 4448  | 28.7     | (27.3-30.1) | 727      | 29.4 | (26-32.8)   | 264  | 25.9     | (20.6-31.4) | 129      | 28.2 | (20.6-36.4) |   |                  |    |          |  |
|               | 2004-2008 | 6009     | 30.5 | (29.3-31.7) | 4765  | 30.5     | (29.2-31.9) | 790      | 32.5 | (29.2-35.9) | 308  | 27       | (22.1-32.1) | 146      | 28.8 | (21.6-36.5) |   |                  |    |          |  |
|               | 2005-2009 | 6594     | 32.3 | (31.2-33.5) | 5219  | 32       | (30.7-33.3) | 853      | 35.4 | (32.1-38.7) | 348  | 31.9     | (27-37)     | 174      | 32.3 | (25.4-39.5) |   |                  |    |          |  |
|               | 2006-2010 | 7194     | 34.6 | (33.5-35.7) | 5688  | 34.6     | (33.4-35.9) | 938      | 35.5 | (32.3-38.6) | 383  | 33.4     | (28.6-38.3) | 185      | 35   | (28.1-42.1) |   |                  |    |          |  |
|               | 2007-2011 | 7750     | 36.4 | (35.3-37.5) | 6069  | 36       | (34.7-37.2) | 1031     | 38.6 | (35.5-41.6) | 445  | 37.9     | (33.3-42.5) | 205      | 38.1 | (31.3-44.8) |   |                  |    |          |  |
|               | 2008-2012 | 8353     | 38.5 | (37.4-39.6) | 6527  | 37.7     | (36.5-38.9) | 1113     | 43.1 | (40.1-46.1) | 489  | 39.6     | (35.1-44)   | 224      | 40.8 | (34.2-47.3) |   |                  |    |          |  |
|               | 2009-2013 | 9274     | 40.2 | (39.1-41.2) | 7215  | 39.3     | (38.1-40.4) | 1266     | 45.4 | (42.6-48.2) | 538  | 39.9     | (35.7-44.1) | 255      | 43.3 | (37-49.5)   |   |                  |    |          |  |
|               | 2010-2014 | 10178    | 42.4 | (41.5-43.4) | 7961  | 42       | (40.9-43.1) | 1380     | 45.1 | (42.4-47.8) | 559  | 40.4     | (36.3-44.6) | 278      | 44.9 | (38.8-50.8) |   |                  |    |          |  |
|               | 2011-2015 | 11015    | 44.8 | (43.8-45.7) | 8598  | 44.2     | (43.1-45.3) | 1489     | 50   | (47.4-52.6) | 634  | 41.4     | (37.4-45.3) | 294      | 45.2 | (39.3-51)   |   |                  |    |          |  |
|               | 2012-2016 | 11929    | 45.4 | (44.5-46.3) | 9399  | 44.8     | (43.7-45.8) | 1571     | 51.3 | (48.7-53.8) | 648  | 42.3     | (38.4-46.2) | 311      | 43.1 | (37.4-48.7) |   |                  |    |          |  |
|               | 2013-2017 | 12568    | 46.6 | (45.7-47.5) | 9983  | 46.1     | (45.1-47.1) | 1612     | 52.3 | (49.8-54.8) |      |          | ShortFU     | 314      | 43.3 | (37.6-48.8) |   |                  |    |          |  |
| Total Change* |           | 23.9     |      |             | 23.7  |          |             | 25.5     |      |             | 25.5 |          |             | 25.5     |      |             |   |                  |    |          |  |
| Females       | 1997-2001 | 1226     | 27.4 | (24.9-30)   | 992   | 27.7     | (24.9-30.6) | 137      | 30   | (22.4-37.9) | 69   | 21.2     | (12.4-31.7) | 28       | 27.5 | (12.6-44.9) |   |                  |    |          |  |
|               | 1998-2002 | 1288     | 26.9 | (24.5-29.4) | 1039  | 27.8     | (25.1-30.6) | 139      | 28.7 | (21.3-36.5) | 77   | 18.0     | (10.3-27.5) | 33       | 26.5 | (12.9-42.4) |   |                  |    |          |  |
|               | 1999-2003 | 1348     | 28.6 | (26.2-31.1) | 1080  | 29.4     | (26.6-32.2) | 157      | 30.3 | (23.2-37.8) | 76   | 17.9     | (10.2-27.5) | 35       | 38.1 | (22.3-54)   |   |                  |    |          |  |
|               | 2000-2004 | 1377     | 29.9 | (27.5-32.4) | 1093  | 29.9     | (27.2-32.7) | 174      | 33.2 | (26.2-40.4) | 76   | 24.6     | (15.5-34.9) | 34       | 44.5 | (27.4-60.5) |   |                  |    |          |  |
|               | 2001-2005 | 1490     | 29.8 | (27.5-32.2) | 1180  | 29.6     | (27-32.3)   | 185      | 34.6 | (27.7-41.6) | 87   | 22.6     | (14.4-32)   | 38       | 45.9 | (29.5-61)   |   |                  |    |          |  |
|               | 2002-2006 | 1534     | 30.6 | (28.2-33)   | 1197  | 30.3     | (27.7-33)   | 209      | 36.4 | (29.7-43.1) | 89   | 21.3     | (13.4-30.5) | 39       | 41.6 | (25.9-56.8) |   |                  |    |          |  |
|               | 2003-2007 | 1642     | 31.9 | (29.6-34.2) | 1286  | 31.6     | (29-34.2)   | 221      | 36   | (29.6-42.5) | 93   | 23.7     | (15.5-32.8) | 42       | 41.6 | (26.4-56.3) |   |                  |    |          |  |
|               | 2004-2008 | 1720     | 32.5 | (30.2-34.7) | 1332  | 32.5     | (29.9-35.1) | 230      | 37.3 | (31-43.7)   | 111  | 24.8     | (17.1-33.2) | 47       | 29.3 | (17-42.9)   |   |                  |    |          |  |
|               | 2005-2009 | 1861     | 33.8 | (31.7-36)   | 1460  | 34.3     | (31.9-36.8) | 236      | 37.5 | (31.2-43.8) | 113  | 25.6     | (17.9-34.1) | 52       | 32.1 | (19.8-45.1) |   |                  |    |          |  |
|               | 2006-2010 | 2006     | 35.7 | (33.5-37.8) | 1580  | 36       | (33.6-38.4) | 251      | 39.9 | (33.7-46)   | 117  | 27.2     | (19.4-35.7) | 58       | 25.6 | (15.1-37.5) |   |                  |    |          |  |
|               | 2007-2011 | 2218     | 37.4 | (35.3-39.4) | 1760  | 37.4     | (35.1-39.7) | 264      | 40.3 | (34.3-46.3) | 130  | 33.8     | (25.7-42.2) | 64       | 30.9 | (20-42.6)   |   |                  |    |          |  |
|               | 2008-2012 | 2373     | 39.7 | (37.7-41.7) | 1875  | 39.6     | (37.3-41.8) | 295      | 43   | (37.2-48.7) | 138  | 37.9     | (29.7-46.2) | 65       | 35   | (23.5-46.7) |   |                  |    |          |  |
|               | 2009-2013 | 2656     | 41.8 | (39.9-43.7) | 2117  | 41       | (38.9-43.2) | 320      | 48.4 | (42.6-53.9) | 143  | 41.8     | (33.5-50)   | 76       | 40.4 | (29.1-51.4) |   |                  |    |          |  |
|               | 2010-2014 | 2875     | 43.9 | (42-45.7)   | 2278  | 42.8     | (40.7-44.9) | 356      | 50.8 | (45.4-56)   | 150  | 44.5     | (36.2-52.5) | 91       | 43.8 | (33.3-54)   |   |                  |    |          |  |
|               | 2011-2015 | 3131     | 45.6 | (43.8-47.4) | 2467  | 44.6     | (42.6-46.6) | 391      | 52.1 | (46.9-57.1) | 164  | 42.9     | (35.1-50.5) | 109      | 49.6 | (39.7-58.8) |   |                  |    |          |  |
|               | 2012-2016 | 3354     | 47.3 | (45.6-49.1) | 2650  | 47.3     | (44.7-48.6) | 427      | 54.4 | (49.4-59.2) | 160  | 38.1     | (30.4-45.7) | 117      | 48.1 | (38.6-57)   |   |                  |    |          |  |
|               | 2013-2017 | 3523     | 47.3 | (45.6-48.9) | 2798  | 46.6     | (44.7-48.5) | 440      | 53.3 | (48.4-58)   |      |          | ShortFU     | 118      | 51.8 | (42.2-60.6) |   |                  |    |          |  |
| Total Change* |           | 19.9     |      |             | 18.9  |          |             | 23.3     |      |             | 16.9 |          |             | 24.3     |      |             |   |                  |    |          |  |

| ICCA          |           | UK   |          |             |          | England |      |             |    | Scotland |      |             |          | Wales |          |             |      | Northern Ireland |             |          |  |
|---------------|-----------|------|----------|-------------|----------|---------|------|-------------|----|----------|------|-------------|----------|-------|----------|-------------|------|------------------|-------------|----------|--|
| Cohort        | Net       | N    | Survival | CI          | suppress | Net     | N    | Survival    | CI | suppress | Net  | N           | Survival | CI    | suppress | Net         | N    | Survival         | CI          | suppress |  |
|               |           |      |          |             |          |         |      |             |    |          |      |             |          |       |          |             |      |                  |             |          |  |
| Persons       | 1997-2001 | 4573 | 22.6     | (21.4-23.9) |          | 3711    | 22.2 | (20.9-23.6) |    | 488      | 25.3 | (21.4-29.4) |          | 264   | 26.6     | (21.3-32.2) | 110  | 14.6             | (8.7-22.1)  |          |  |
|               | 1998-2002 | 4741 | 23.2     | (22-24.4)   |          | 3866    | 23   | (21.6-24.3) |    | 498      | 24.3 | (20.5-28.3) |          | 277   | 27.9     | (22.6-33.5) | 100  | 18               | (11.1-26.3) |          |  |
|               | 1999-2003 | 4886 | 24.0     | (22.8-25.3) |          | 4004    | 23.6 | (22.3-25)   |    | 491      | 26.6 | (22.7-30.7) |          | 301   | 26.7     | (21.7-31.9) | 90   | 16.7             | (9.7-25.3)  |          |  |
|               | 2000-2004 | 5196 | 24.2     | (23-25.4)   |          | 4278    | 23.6 | (22.4-25)   |    | 506      | 28.4 | (24.4-32.5) |          | 327   | 27.5     | (22.7-32.6) | 85   | 12.8             | (6.6-21)    |          |  |
|               | 2001-2005 | 5379 | 23.7     | (22.6-24.9) |          | 4433    | 23.4 | (22.1-24.7) |    | 528      | 25.6 | (21.9-29.5) |          | 341   | 26.8     | (22.1-31.7) | 77   | 16.4             | (9-25.7)    |          |  |
|               | 2002-2006 | 5742 | 24.0     | (22.9-25.2) |          | 4716    | 23.7 | (22.5-25)   |    | 549      | 25.9 | (22.2-29.8) |          | 361   | 26.9     | (22.4-31.7) | 116  | 16.3             | (10.1-23.8) |          |  |
|               | 2003-2007 | 6042 | 23.9     | (22.8-25)   |          | 4945    | 23.8 | (22.5-25)   |    | 589      | 26.9 | (23.3-30.6) |          | 402   | 24.5     | (20.4-29)   | 106  | 13.1             | (7.5-20.4)  |          |  |
|               | 2004-2008 | 6430 | 24.1     | (23-25.2)   |          | 5284    | 23.9 | (22.7-25.1) |    | 595      | 27   | (23.4-30.7) |          | 438   | 25.1     | (21.1-29.4) | 113  | 19.3             | (12.5-27.2) |          |  |
|               | 2005-2009 | 6875 | 24.8     | (23.8-25.9) |          | 5705    | 24.6 | (23.5-25.8) |    | 600      | 28.4 | (24.8-32.2) |          | 452   | 24.4     | (20.5-28.6) | 118  | 25.9             | (18.2-34.2) |          |  |
|               | 2006-2010 | 7215 | 25.4     | (24.4-26.4) |          | 6061    | 25   | (23.9-26.2) |    | 591      | 30.8 | (27-34.6)   |          | 451   | 26.7     | (22.6-30.9) | 112  | 24.3             | (16.7-32.8) |          |  |
|               | 2007-2011 | 7553 | 26.1     | (25.1-27.1) |          | 6383    | 25.7 | (24.6-26.8) |    | 610      | 30.1 | (26.4-33.8) |          | 461   | 26.9     | (22.9-31.1) | 99   | 27.2             | (18.7-36.5) |          |  |
|               | 2008-2012 | 7917 | 26.7     | (25.8-27.8) |          | 6687    | 26.1 | (25-27.2)   |    | 652      | 30.2 | (26.6-33.9) |          | 473   | 30.6     | (26.4-34.9) | 105  | 30.3             | (21.7-39.5) |          |  |
|               | 2009-2013 | 8272 | 27.8     | (26.8-28.8) |          | 6938    | 27.2 | (26.1-28.3) |    | 731      | 31.2 | (27.7-34.6) |          | 492   | 30.3     | (26.2-34.5) | 111  | 31.3             | (22.7-40.4) |          |  |
|               | 2010-2014 | 8542 | 29.1     | (28.1-30.1) |          | 7109    | 28.5 | (27.5-29.6) |    | 804      | 32.7 | (29.4-36.1) |          | 506   | 31.5     | (27.4-35.7) | 123  | 26.5             | (18.9-34.8) |          |  |
|               | 2011-2015 | 9066 | 29.7     | (28.8-30.7) |          | 7464    | 29.6 | (28.6-30.7) |    | 900      | 31.2 | (28.1-34.3) |          | 555   | 29.4     | (25.6-33.4) | 147  | 25.5             | (18.6-33)   |          |  |
|               | 2012-2016 | 9444 | 30.1     | (29.2-31.1) |          | 7783    | 30.3 | (29.3-31.4) |    | 936      | 28.4 | (25.4-31.4) |          | 568   | 30.9     | (27.1-34.9) | 157  | 27.5             | (20.6-34.9) |          |  |
|               | 2013-2017 | 9795 | 30.5     | (29.6-31.4) |          | 8109    | 30.7 | (29.7-31.7) |    | 958      | 28.5 | (25.6-31.5) |          |       |          | ShortFU     | 173  | 28.3             | (21.6-35.3) |          |  |
| Total Change* |           |      | 7.9      |             |          | 8.5     |      |             |    | 3.2      |      |             | 4.3      |       |          |             | 13.7 |                  |             |          |  |
| Males         | 1997-2001 | 2138 | 22.2     | (20.4-24)   |          | 1764    | 21.7 | (19.7-23.7) |    | 213      | 25.8 | (20-32)     |          | 118   | 20.7     | (13.8-28.7) |      |                  |             | Insuff   |  |
|               | 1998-2002 | 2203 | 21.9     | (20.1-23.7) |          | 1822    | 21.9 | (20-23.9)   |    | 216      | 22.3 | (16.9-28.3) |          | 126   | 26.5     | (19-34.8)   |      |                  |             | Insuff   |  |
|               | 1999-2003 | 2295 | 22.9     | (21.1-24.7) |          | 1910    | 23.1 | (21.1-25)   |    | 216      | 21.5 | (16.2-27.4) |          | 133   | 25.8     | (18.5-33.8) |      |                  |             | Insuff   |  |
|               | 2000-2004 | 2415 | 23.2     | (21.5-24.9) |          | 2014    | 23.2 | (21.3-25.1) |    | 218      | 22.9 | (17.4-28.9) |          | 142   | 27.4     | (20.1-35.1) |      |                  |             | Insuff   |  |
|               | 2001-2005 | 2525 | 23.2     | (21.5-24.9) |          | 2102    | 23.2 | (21.3-25.1) |    | 231      | 21.8 | (16.6-27.5) |          | 151   | 27.7     | (20.7-35.3) |      |                  |             | Insuff   |  |
|               | 2002-2006 | 2712 | 23.5     | (21.9-25.2) |          | 2231    | 23.5 | (21.7-25.3) |    | 258      | 24.2 | (19-29.7)   |          | 161   | 25.7     | (19.1-32.9) | 62   | 11.4             | (5-20.9)    |          |  |
|               | 2003-2007 | 2838 | 24.1     | (22.5-25.7) |          | 2324    | 24   | (22.3-25.9) |    | 277      | 26.4 | (21.2-31.9) |          | 182   | 24.7     | (18.5-31.3) | 55   | 14.8             | (6.9-25.7)  |          |  |
|               | 2004-2008 | 3020 | 24.5     | (22.9-26)   |          | 2485    | 24.2 | (22.5-25.9) |    | 278      | 29.6 | (24.2-35.2) |          | 201   | 24.0     | (18.2-30.3) | 59   | 21.7             | (11.9-33.5) |          |  |
|               | 2005-2009 | 3247 | 24.7     | (23.2-26.3) |          | 2688    | 24.2 | (22.6-25.9) |    | 285      | 32.5 | (27-38.2)   |          | 215   | 22.4     | (17-28.3)   | 56   | 25.8             | (15.3-37.7) |          |  |
|               | 2006-2010 | 3385 | 25.8     | (24.3-27.3) |          | 2834    | 25.4 | (23.7-27)   |    | 278      | 34.5 | (28.8-40.3) |          | 215   | 25.7     | (19.9-31.9) | 58   | 22.5             | (12.6-34.2) |          |  |
|               | 2007-2011 | 3552 | 26.5     | (25.1-28)   |          | 3008    | 26.3 | (24.7-27.9) |    | 274      | 31.9 | (26.3-37.7) |          | 219   | 24.8     | (19.2-30.8) | 51   | 25.6             | (14.4-38.4) |          |  |
|               | 2008-2012 | 3750 | 27.2     | (25.8-28.7) |          | 3171    | 26.6 | (25-28.2)   |    | 289      | 33.1 | (27.6-38.7) |          | 227   | 28.5     | (22.6-34.7) | 63   | 28.4             | (17.7-40.1) |          |  |
|               | 2009-2013 | 3903 | 28.2     | (26.8-29.7) |          | 3285    | 27.8 | (26.2-29.3) |    | 327      | 32.5 | (27.4-37.8) |          | 226   | 29.1     | (23.2-35.3) | 65   | 28.8             | (18.2-40.5) |          |  |
|               | 2010-2014 | 4053 | 30.2     | (28.7-31.6) |          | 3381    | 29.8 | (28.2-31.4) |    | 364      | 33.1 | (28.2-38.1) |          | 241   | 33.2     | (27.2-39.3) | 67   | 27.3             | (17.1-38.7) |          |  |
|               | 2011-2015 | 4320 | 30.1     | (28.7-31.5) |          | 3558    | 29.8 | (28.3-31.4) |    | 409      | 32.9 | (28.2-37.6) |          | 277   | 30.7     | (25.2-36.3) | 76   | 27               | (17.4-37.6) |          |  |
|               | 2012-2016 | 4506 | 30.2     | (28.8-31.6) |          | 3715    | 29.9 | (28.4-31.5) |    | 430      | 30.4 | (26-35)     |          | 287   | 35.7     | (30.1-41.4) | 74   | 33.4             | (22.8-44.6) |          |  |
|               | 2013-2017 | 4695 | 30.2     | (28.8-31.5) |          | 3897    | 30.3 | (28.8-31.8) |    | 450      | 27.7 | (23.5-32)   |          |       |          | ShortFU     | 74   | 35.3             | (24.4-46.5) |          |  |
| Total Change* |           |      | 8.0      |             |          | 8.6     |      |             |    | 1.9      |      |             | 15.0     |       |          |             | NC   |                  |             |          |  |
| Females       | 1997-2001 | 2435 | 23.7     | (22-25.5)   |          | 1947    | 23.7 | (21.7-25.6) |    | 275      | 24.5 | (19.5-29.9) |          | 146   | 29.8     | (22.5-37.6) | 67   | 12.3             | (5.7-21.6)  |          |  |
|               | 1998-2002 | 2538 | 24.8     | (23.1-26.6) |          | 2044    | 24.5 | (22.6-26.4) |    | 282      | 26.5 | (21.3-31.9) |          | 151   | 29.6     | (22.4-37.2) | 61   | 29.4             | (18.3-41.4) |          |  |
|               | 1999-2003 | 2591 | 25.6     | (23.9-27.4) |          | 2094    | 24.7 | (22.8-26.6) |    | 275      | 31.5 | (25.9-37.2) |          | 168   | 27.9     | (21.2-35)   | 54   | 28.8             | (17.2-41.6) |          |  |
|               | 2000-2004 | 2781 | 25.4     | (23.8-27.1) |          | 2264    | 24.3 | (22.5-26.1) |    | 288      | 33.8 | (28.2-39.5) |          | 185   | 27.9     | (21.5-34.7) | 44   | 28.6             | (16-42.8)   |          |  |
|               | 2001-2005 | 2854 | 24.6     | (23-26.2)   |          | 2331    | 23.8 | (22.1-25.6) |    | 297      | 30.3 | (25-35.8)   |          | 190   | 28.0     | (21.7-34.6) | 36   | 30.8             | (16.4-46.5) |          |  |
|               | 2002-2006 | 3030 | 24.8     | (23.2-26.4) |          | 2485    | 24.1 | (22.4-25.9) |    | 291      | 28.9 | (23.7-34.4) |          | 200   | 30.4     | (24-37)     | 54   | 24.1             | (13.5-36.4) |          |  |
|               | 2003-2007 | 3204 | 23.7     | (22.2-25.2) |          | 2621    | 23.5 | (21.9-25.2) |    | 312      | 27.1 | (22.1-32.3) |          | 220   | 25.3     | (19.7-31.4) | 51   | 9                | (3.1-19)    |          |  |
|               | 2004-2008 | 3410 | 23.8     | (22.4-25.3) |          | 2799    | 23.7 | (22.1-25.3) |    | 317      | 23.6 | (19-28.6)   |          | 237   | 27.2     | (21.6-33.1) | 57   | 14.7             | (6.9-25.3)  |          |  |
|               | 2005-2009 | 3628 | 25.0     | (23.6-26.5) |          | 3017    | 25.1 | (23.5-26.7) |    | 315      | 24   | (19.3-28.9) |          | 237   | 27.6     | (22-33.6)   | 59   | 22.1             | (12.5-33.6) |          |  |
|               | 2006-2010 | 3830 | 25.0     | (23.6-26.4) |          | 3227    | 24.7 | (23.2-26.2) |    | 313      | 27.1 | (22.2-32.3) |          | 236   | 27.5     | (21.9-33.5) | 54   | 23.6             | (13.2-35.8) |          |  |
|               | 2007-2011 | 4001 | 25.6     | (24.2-27)   |          | 3375    | 25.1 | (23.6-26.6) |    | 336      | 28.6 | (23.8-33.7) |          | 242   | 29.2     | (23.5-35.2) | 48   | 33.2             | (20.2-46.9) |          |  |
|               | 2008-2012 | 4167 | 26.3     | (25-27.7)   |          | 3516    | 25.6 | (24.2-27.1) |    | 363      | 27.3 | (22.7-32.1) |          | 246   | 32.4     | (26.5-38.5) | 42   | 39.6             | (24.7-54.4) |          |  |
|               | 2009-2013 | 4369 | 27.4     | (26.1-28.8) |          | 3653    | 26.7 | (25.3-28.2) |    | 404      | 29.4 | (25-34.1)   |          | 266   | 31.2     | (25.6-37)   | 46   | 38.4             | (24.2-52.6) |          |  |
|               | 2010-2014 | 4489 | 28.1     | (26.8-29.4) |          | 3728    | 27.4 | (26-28.9)   |    | 440      | 32.5 | (28-37)     |          | 265   | 29.3     | (23.8-35)   | 56   | 30.3             | (18.6-42.9) |          |  |
|               | 2011-2015 | 4746 | 29.5     | (28.2-30.9) |          | 3906    | 29.6 | (28.1-31.1) |    | 491      | 29.5 | (25.4-33.7) |          | 278   | 28.7     | (23.3-34.2) | 71   | 25.8             | (16.1-36.7) |          |  |
|               | 2012-2016 | 4938 | 30.3     | (29-31.6)   |          | 4068    | 31   | (29.5-32.4) |    | 506      | 26.7 | (22.8-30.7) |          | 281   | 28.1     | (22.9-33.7) | 83   | 26.2             | (17.1-36.2) |          |  |
|               | 2013-2017 | 5100 | 31.1     | (29.8-32.4) |          | 4212    | 31.5 | (30-32.9)   |    | 508      | 30   | (26-34.1)   |          |       |          | ShortFU     | 99   | 22.5             | (14.7-31.3) |          |  |
| Total Change* |           |      | 7.4      |             |          | 7.8     |      |             |    | 5.5      |      |             | -1.7     |       |          |             | 10.2 |                  |             |          |  |

| Other         |           | UK       |      |             |      | England  |             |          |      | Scotland    |     |          |             | Wales    |         |             |             | Northern Ireland |    |          |  |
|---------------|-----------|----------|------|-------------|------|----------|-------------|----------|------|-------------|-----|----------|-------------|----------|---------|-------------|-------------|------------------|----|----------|--|
| Cohort        | N         | Net      |      | suppress    | N    | Net      |             | suppress | N    | Net         |     | suppress | N           | Net      |         | suppress    | N           | Net              |    | suppress |  |
|               |           | Survival | CI   |             |      | Survival | CI          |          |      | Survival    | CI  |          |             | Survival | CI      |             |             | Survival         | CI |          |  |
| Persons       | 1997-2001 | 1648     | 13.2 | (11.6-14.9) | 1397 | 12.9     | (11.2-14.8) | 108      | 15.5 | (9.3-23.2)  | 117 | 15.9     | (9.8-23.2)  | 26       | 13.2    | (3.6-29.2)  |             |                  |    |          |  |
|               | 1998-2002 | 1610     | 14.4 | (12.7-16.2) | 1379 | 14.3     | (12.4-16.2) | 102      | 18.2 | (11.3-26.5) | 109 | 15.3     | (9.2-22.9)  | 20       | 2.5     | (0-17.7)    |             |                  |    |          |  |
|               | 1999-2003 | 1571     | 15.6 | (13.8-17.5) | 1345 | 15.4     | (13.4-17.4) | 96       | 18.6 | (11.4-27.3) | 105 | 19.2     | (12.2-27.5) | 25       | 4.8     | (0.4-18.4)  |             |                  |    |          |  |
|               | 2000-2004 | 1442     | 16.8 | (14.9-18.8) | 1230 | 16.5     | (14.5-18.7) | 93       | 18.9 | (11.6-27.8) | 87  | 21.2     | (13.2-30.5) | 32       | 8.1     | (1.8-20.9)  |             |                  |    |          |  |
|               | 2001-2005 | 1386     | 18.5 | (16.5-20.7) | 1190 | 18.6     | (16.4-20.9) | 91       | 15.8 | (9-24.3)    | 78  | 20.2     | (12-30)     | 27       | 18.9    | (6.8-35.7)  |             |                  |    |          |  |
|               | 2002-2006 | 1414     | 21.0 | (18.9-23.3) | 1222 | 21.7     | (19.4-24.1) | 91       | 16.3 | (9.4-24.9)  | 69  | 17.7     | (9.6-27.9)  |          |         |             |             |                  |    |          |  |
|               | 2003-2007 | 1443     | 22.6 | (20.5-24.9) | 1249 | 23.5     | (21.2-26)   | 101      | 16.7 | (10-24.8)   | 56  | 16.1     | (7.8-27.2)  |          |         |             |             |                  |    |          |  |
|               | 2004-2008 | 1591     | 24.6 | (22.4-26.8) | 1403 | 25.8     | (23.5-28.2) | 104      | 13.6 | (7.7-21.2)  | 49  | 9.4      | (3.2-19.7)  |          |         |             |             |                  |    |          |  |
|               | 2005-2009 | 1793     | 28.3 | (26.2-30.5) | 1610 | 29.5     | (27.2-31.8) | 99       | 12.5 | (6.8-20)    | 47  | 16.3     | (7.3-28.6)  |          |         |             |             |                  |    |          |  |
|               | 2006-2010 | 2032     | 30.4 | (28.4-32.5) | 1829 | 31.6     | (29.4-33.8) | 103      | 14.3 | (8.3-22)    | 47  | 27.1     | (15.1-40.7) | 53       | 18.6    | (9.4-30.3)  |             |                  |    |          |  |
|               | 2007-2011 | 2141     | 31.6 | (29.6-33.6) | 1921 | 32.4     | (30.3-34.6) | 103      | 15.9 | (9.5-23.8)  | 54  | 36.4     | (23.6-49.5) | 63       | 25.4    | (15.3-36.8) |             |                  |    |          |  |
|               | 2008-2012 | 2420     | 33.4 | (31.4-35.3) | 2197 | 34.1     | (32.1-36.1) | 94       | 15.7 | (9.1-24)    | 67  | 36.7     | (25.1-48.5) | 62       | 29.4    | (18.5-41.3) |             |                  |    |          |  |
|               | 2009-2013 | 2736     | 35.9 | (34-37.7)   | 2515 | 36.4     | (34.4-38.3) | 87       | 16.2 | (9.2-25)    |     |          |             | Insuff   | 62      | 30.9        | (19.7-42.9) |                  |    |          |  |
|               | 2010-2014 | 3006     | 36.0 | (34.2-37.8) | 2763 | 36.5     | (34.6-38.3) | 94       | 20.4 | (12.8-29.3) | 86  | 43.7     | (32.8-54.2) | 63       | 30.9    | (19.8-42.9) |             |                  |    |          |  |
|               | 2011-2015 | 3054     | 37.1 | (35.3-38.9) | 2820 | 37.3     | (35.4-39.1) | 83       | 25.6 | (16.6-35.8) | 97  | 42.7     | (32.4-52.7) | 54       | 41.6    | (28.1-54.7) |             |                  |    |          |  |
|               | 2012-2016 | 3174     | 37.4 | (35.6-39.1) | 2949 | 37.6     | (35.8-39.4) | 77       | 18.7 | (10.7-28.5) | 102 | 41.3     | (31.4-51.1) | 46       | 41.1    | (26.6-55.3) |             |                  |    |          |  |
|               | 2013-2017 | 3065     | 37.9 | (36.1-39.6) | 2831 | 38.2     | (36.3-40)   |          |      |             |     |          |             | Insuff   | ShortFU | 50          | 27.5        | (15.8-40.7)      |    |          |  |
| Total Change* |           | 24.7     |      | 25.3        |      | NC       |             | 25.4     |      |             |     | 14.3     |             |          |         |             |             |                  |    |          |  |
| Males         | 1997-2001 | 976      | 11.2 | (9.2-13.3)  | 825  | 10.7     | (8.7-13)    | 63       | 12.1 | (5.4-21.7)  | 71  | 13.2     | (6.5-22.4)  |          |         |             |             |                  |    |          |  |
|               | 1998-2002 | 970      | 12.3 | (10.3-14.5) | 826  | 11.8     | (9.7-14.2)  | 61       | 15.7 | (7.7-26.2)  | 69  | 15.1     | (7.7-24.8)  | 14       | 3.1     | (0-23.1)    |             |                  |    | 2yr>1yr  |  |
|               | 1999-2003 | 936      | 12.6 | (10.5-14.9) | 794  | 11.9     | (9.7-14.3)  | 53       | 15   | (6.9-26.3)  | 72  | 21.6     | (12.8-32)   | 17       | 6.5     | (0.5-24.8)  |             |                  |    |          |  |
|               | 2000-2004 | 841      | 14.1 | (11.8-16.6) | 714  | 13.4     | (10.9-16.1) | 49       | 16.1 | (7.3-28.1)  | 57  | 22.5     | (12.5-34.4) |          |         |             |             |                  |    |          |  |
|               | 2001-2005 | 787      | 15.6 | (13.1-18.4) | 667  | 15.4     | (12.7-18.3) | 53       | 13.5 | (5.9-24.5)  | 49  | 19.3     | (9.5-31.7)  | 18       | 15.1    | (3.3-35.4)  |             |                  |    |          |  |
|               | 2002-2006 | 799      | 17.4 | (14.8-20.2) | 683  | 18       | (15.1-21)   | 50       | 14.1 | (6.1-25.6)  | 46  | 15.1     | (6.5-27.4)  |          |         |             |             |                  |    |          |  |
|               | 2003-2007 | 828      | 19.8 | (17.1-22.7) | 717  | 20.6     | (17.7-23.8) |          |      |             | 34  | 15.8     | (5.9-30.3)  |          |         |             |             |                  |    |          |  |
|               | 2004-2008 | 915      | 22.4 | (19.6-25.2) | 808  | 23.7     | (20.7-26.7) |          |      |             | 25  | 8.6      | (1.5-23.9)  |          |         |             |             |                  |    |          |  |
|               | 2005-2009 | 1030     | 24.4 | (21.7-27.1) | 926  | 25.6     | (22.8-28.5) |          |      |             | 20  | 15.0     | (3.5-34.4)  |          |         |             |             |                  |    |          |  |
|               | 2006-2010 | 1166     | 26.8 | (24.2-29.4) | 1053 | 28.2     | (25.4-31)   |          |      |             |     |          |             | Insuff   | 26      | 9           | (1.8-23.8)  |                  |    |          |  |
|               | 2007-2011 | 1242     | 28.0 | (25.5-30.6) | 1117 | 29.4     | (26.7-32.1) | 73       | 13.4 | (6.7-22.5)  |     |          |             | Insuff   | 31      | 9.8         | (2.5-23.5)  |                  |    |          |  |
|               | 2008-2012 | 1405     | 30.7 | (28.2-33.2) | 1270 | 31.9     | (29.3-34.6) | 66       | 13.9 | (6.8-23.6)  |     |          |             | Insuff   | 34      | 17.2        | (6.8-31.9)  |                  |    |          |  |
|               | 2009-2013 | 1586     | 34.3 | (31.9-36.7) | 1450 | 35.3     | (32.8-37.8) | 62       | 16.2 | (8.2-26.7)  |     |          |             | Insuff   | 34      | 19.7        | (8.3-34.7)  |                  |    |          |  |
|               | 2010-2014 | 1732     | 36.0 | (33.7-38.3) | 1584 | 36.8     | (34.4-39.3) | 60       | 19   | (10.1-30.2) | 54  | 35.2     | (22.6-48.3) | 34       | 25.4    | (12.2-41.1) |             |                  |    |          |  |
|               | 2011-2015 | 1742     | 37.3 | (35-39.6)   | 1595 | 37.9     | (35.5-40.4) | 55       | 18.2 | (9.2-29.8)  | 59  | 32.1     | (20.4-44.5) |          |         |             |             |                  |    |          |  |
|               | 2012-2016 | 1816     | 38.0 | (35.7-40.3) | 1667 | 38.4     | (36-40.8)   |          |      |             | 70  | 35.9     | (24.6-47.4) |          |         |             |             |                  |    |          |  |
|               | 2013-2017 | 1721     | 38.4 | (36-40.8)   | 1570 | 38.9     | (36.4-41.4) |          |      |             |     |          |             | ShortFU  |         |             |             |                  |    |          |  |
| Total Change* |           | 27.2     |      | 28.2        |      | NC       |             | 22.7     |      |             |     | NC       |             |          |         |             |             |                  |    |          |  |
| Females       | 1997-2001 | 672      | 17.0 | (14.2-20)   | 572  | 17.1     | (14-20.3)   | 45       | 17.8 | (8.2-30.6)  | 46  | 20.7     | (10.3-33.5) |          |         |             |             |                  |    |          |  |
|               | 1998-2002 | 640      | 18.3 | (15.3-21.5) | 553  | 19       | (15.8-22.5) | 41       | 17.9 | (7.9-31.4)  | 40  | 12.8     | (4.7-25.3)  |          |         |             |             |                  |    |          |  |
|               | 1999-2003 | 635      | 20.8 | (17.6-24.1) | 551  | 21.2     | (17.8-24.8) | 43       | 21.7 | (10.7-35.5) |     |          |             | 2yr>1yr  |         |             |             |                  |    |          |  |
|               | 2000-2004 | 601      | 20.9 | (17.7-24.3) | 516  | 21.2     | (17.7-24.9) | 44       | 19.5 | (9.2-32.8)  |     |          |             | Insuff   |         |             |             |                  |    |          |  |
|               | 2001-2005 | 599      | 22.2 | (18.9-25.7) | 523  | 22.6     | (19-26.3)   | 38       | 13.3 | (4.8-26.5)  |     |          |             | Insuff   |         |             |             |                  |    |          |  |
|               | 2002-2006 | 615      | 25.2 | (21.7-28.7) | 539  | 26.1     | (22.3-29.9) | 41       | 16   | (6.6-29.3)  |     |          |             | Insuff   |         |             |             |                  |    |          |  |
|               | 2003-2007 | 615      | 25.8 | (22.3-29.4) | 532  | 27.1     | (23.3-31)   | 44       | 15.4 | (6.5-28)    |     |          |             | Insuff   |         |             |             |                  |    |          |  |
|               | 2004-2008 | 676      | 27.6 | (24.2-31.1) | 595  | 28.9     | (25.2-32.6) | 42       | 18.8 | (8.6-32.1)  |     |          |             | Insuff   |         |             |             |                  |    |          |  |
|               | 2005-2009 | 763      | 34.1 | (30.6-37.6) | 684  | 35       | (31.4-38.7) | 36       | 22.9 | (10.7-38.1) |     |          |             | Insuff   |         |             |             |                  |    |          |  |
|               | 2006-2010 | 866      | 36.1 | (32.8-39.4) | 776  | 37.1     | (33.6-40.6) |          |      |             | 26  | 35.0     | (17.4-53.6) |          |         |             |             |                  |    |          |  |
|               | 2007-2011 | 899      | 37.0 | (33.8-40.2) | 804  | 37.2     | (33.8-40.7) |          |      |             | 33  | 40.4     | (23.5-57)   |          |         |             |             |                  |    |          |  |
|               | 2008-2012 | 1015     | 37.5 | (34.4-40.5) | 927  | 37.5     | (34.3-40.7) |          |      |             | 32  | 45.1     | (27.2-61.8) |          |         |             |             |                  |    |          |  |
|               | 2009-2013 | 1150     | 37.9 | (35-40.8)   | 1065 | 37.6     | (34.7-40.6) |          |      |             |     |          |             | Insuff   |         |             |             |                  |    |          |  |
|               | 2010-2014 | 1274     | 35.6 | (32.9-38.3) | 1179 | 35.4     | (32.6-38.2) | 34       | 20.2 | (8.6-35.5)  |     |          |             | Insuff   |         |             |             |                  |    |          |  |
|               | 2011-2015 | 1312     | 36.6 | (33.9-39.3) | 1225 | 36.1     | (33.3-38.9) | 28       | 24   | (10.1-41.4) | 38  | 64.3     | (46.3-78.3) |          |         |             |             |                  |    |          |  |
|               | 2012-2016 | 1358     | 36.5 | (33.8-39.1) | 1282 | 36.5     | (33.8-39.2) |          |      |             | 32  | 54.9     | (35.6-71.2) |          |         |             |             |                  |    |          |  |
|               | 2013-2017 | 1344     | 37.2 | (34.5-39.8) | 1261 | 37.3     | (34.5-40)   |          |      |             |     |          |             | ShortFU  |         |             |             |                  |    |          |  |
| Total Change* |           | 20.2     |      | 20.2        |      | NC       |             | 34.2     |      |             |     | NC       |             |          |         |             |             |                  |    |          |  |

\*Between 1997-2001 and 2013-2017 (2012-2016 for Wales). Suppressed results: Insuff, no deaths or data in at least one age band; <10, less than 10 cases in total; SE>0.2, standard error greater than 0.2; 2yr>1yr, 2yr survival longer than 1 year survival; NC: Not Calculatable

Table S7 Primary liver cancer two-year age-standardised net-survival by nation, sex, subtype and 5-year cohort

| Cohort         | UK       |          |             |          | England  |          |             |          | Scotland |          |             |          | Wales    |          |             |          | Northern Ireland |          |             |          |  |
|----------------|----------|----------|-------------|----------|----------|----------|-------------|----------|----------|----------|-------------|----------|----------|----------|-------------|----------|------------------|----------|-------------|----------|--|
|                | Net<br>N | Survival | CI          | suppress | Net<br>N | Survival | CI          | suppress | Net<br>N | Survival | CI          | suppress | Net<br>N | Survival | CI          | suppress | Net<br>N         | Survival | CI          | suppress |  |
| <b>PLC</b>     |          |          |             |          |          |          |             |          |          |          |             |          |          |          |             |          |                  |          |             |          |  |
| <b>Persons</b> |          |          |             |          |          |          |             |          |          |          |             |          |          |          |             |          |                  |          |             |          |  |
| 1997-2001      | 2300     | 12.8     | (12.1-13.4) |          | 1848     | 12.7     | (12-13.4)   |          | 286      | 13.6     | (11.6-15.8) |          | 126      | 13.7     | (11.1-16.6) |          | 41               | 7        | (4.1-11.1)  |          |  |
| 1998-2002      | 2495     | 13.2     | (12.6-13.9) |          | 2035     | 13.2     | (12.5-13.9) |          | 287      | 13.8     | (11.8-15.9) |          | 138      | 14.1     | (11.4-17)   |          | 39               | 8.7      | (5.4-13)    |          |  |
| 1999-2003      | 2702     | 13.9     | (13.3-14.6) |          | 2200     | 13.9     | (13.2-14.6) |          | 314      | 13.8     | (11.8-15.9) |          | 148      | 15.5     | (12.8-18.5) |          | 43               | 10.3     | (6.7-14.9)  |          |  |
| 2000-2004      | 2906     | 14.1     | (13.5-14.7) |          | 2348     | 14       | (13.3-14.7) |          | 357      | 14.8     | (12.8-16.8) |          | 164      | 16       | (13.3-19)   |          | 44               | 11.1     | (7.3-15.8)  |          |  |
| 2001-2005      | 3071     | 14.5     | (13.8-15.1) |          | 2488     | 14.3     | (13.6-15)   |          | 371      | 15.3     | (13.4-17.3) |          | 167      | 15.7     | (13.1-18.6) |          | 50               | 12.6     | (8.6-17.4)  |          |  |
| 2002-2006      | 3421     | 15.3     | (14.7-16)   |          | 2777     | 15.3     | (14.7-16)   |          | 410      | 15.6     | (13.7-17.6) |          | 178      | 15.7     | (13.1-18.5) |          | 60               | 13.3     | (9.6-17.6)  |          |  |
| 2003-2007      | 3754     | 16.0     | (15.4-16.7) |          | 3042     | 16       | (15.3-16.7) |          | 449      | 16.6     | (14.7-18.5) |          | 193      | 16       | (13.5-18.7) |          | 69               | 14.8     | (11-19.2)   |          |  |
| 2004-2008      | 4210     | 17.1     | (16.5-17.7) |          | 3412     | 17.1     | (16.4-17.8) |          | 498      | 19.0     | (17.1-21)   |          | 221      | 15.5     | (13.2-18.1) |          | 79               | 13.5     | (10-17.5)   |          |  |
| 2005-2009      | 4829     | 18.5     | (17.9-19.1) |          | 3929     | 18.3     | (17.7-19)   |          | 549      | 20.8     | (18.9-22.9) |          | 250      | 17.9     | (15.5-20.5) |          | 104              | 16.9     | (13.2-21)   |          |  |
| 2006-2010      | 5495     | 19.7     | (19.1-20.3) |          | 4505     | 19.5     | (18.8-20.1) |          | 602      | 22.2     | (20.3-24.2) |          | 279      | 20       | (17.5-22.7) |          | 113              | 18.8     | (15.1-22.9) |          |  |
| 2007-2011      | 6117     | 20.8     | (20.2-21.4) |          | 4960     | 20.2     | (19.6-20.9) |          | 675      | 24.4     | (22.4-26.4) |          | 347      | 21.5     | (19-24.1)   |          | 136              | 21.8     | (17.9-26)   |          |  |
| 2008-2012      | 6902     | 22.2     | (21.6-22.8) |          | 5557     | 21.5     | (20.9-22.2) |          | 789      | 27.0     | (25.1-29)   |          | 403      | 23.1     | (20.7-25.7) |          | 157              | 23.2     | (19.3-27.4) |          |  |
| 2009-2013      | 7897     | 23.4     | (22.9-24)   |          | 6339     | 22.7     | (22-23.3)   |          | 937      | 29.0     | (27.1-30.9) |          | 441      | 24.2     | (21.7-26.7) |          | 187              | 26.2     | (22.3-30.3) |          |  |
| 2010-2014      | 8920     | 25.1     | (24.5-25.7) |          | 7181     | 24.5     | (23.8-25.1) |          | 1051     | 29.4     | (27.6-31.2) |          | 479      | 25.3     | (22.9-27.8) |          | 206              | 27.1     | (23.3-31.1) |          |  |
| 2011-2015      | 9947     | 26.5     | (25.9-27)   |          | 7978     | 25.9     | (25.3-26.5) |          | 1207     | 31.2     | (29.4-33)   |          | 530      | 25.3     | (23-27.7)   |          | 232              | 25.7     | (22.2-29.5) |          |  |
| 2012-2016      | 10753    | 27.2     | (26.6-27.7) |          | 8686     | 26.7     | (26.1-27.3) |          | 1286     | 31.4     | (29.7-33.2) |          |          |          | ShortFU     |          | 241              | 26.1     | (22.6-29.7) |          |  |
| Total Change*  |          | 14.4     |             |          |          | 14.0     |             |          |          | 17.8     |             |          |          | 11.6     |             |          |                  | 19.1     |             |          |  |
| <b>Males</b>   |          |          |             |          |          |          |             |          |          |          |             |          |          |          |             |          |                  |          |             |          |  |
| 1997-2001      | 1329     | 12.5     | (11.7-13.3) |          | 1071     | 12.4     | (11.5-13.3) |          | 169      | 14.3     | (11.7-17.2) |          | 64       | 11       | (7.9-14.7)  |          | 22               | 5.8      | (2.4-11.4)  |          |  |
| 1998-2002      | 1459     | 13.0     | (12.1-13.8) |          | 1194     | 12.8     | (12-13.8)   |          | 170      | 14.2     | (11.6-17)   |          | 76       | 12.8     | (9.5-16.6)  |          | 17               | 6.5      | (2.9-12.1)  |          |  |
| 1999-2003      | 1594     | 13.6     | (12.8-14.4) |          | 1309     | 13.5     | (12.7-14.5) |          | 178      | 13.7     | (11.2-16.4) |          | 84       | 14.7     | (11.3-18.6) |          | 21               | 8.4      | (4.3-14.3)  |          |  |
| 2000-2004      | 1730     | 14.0     | (13.2-14.8) |          | 1415     | 14       | (13.1-14.9) |          | 197      | 13.4     | (11.1-16)   |          | 91       | 15.8     | (12.3-19.8) |          | 23               | 9.4      | (5.2-15.2)  |          |  |
| 2001-2005      | 1857     | 14.4     | (13.6-15.2) |          | 1516     | 14.4     | (13.5-15.3) |          | 216      | 14.2     | (11.9-16.8) |          | 95       | 15.9     | (12.4-19.8) |          | 27               | 10       | (5.8-15.7)  |          |  |
| 2002-2006      | 2099     | 15.3     | (14.5-16.1) |          | 1714     | 15.3     | (14.5-16.2) |          | 249      | 15.1     | (12.8-17.6) |          | 103      | 16.2     | (12.7-20)   |          | 34               | 10.7     | (6.7-15.8)  |          |  |
| 2003-2007      | 2358     | 16.3     | (15.5-17.1) |          | 1913     | 16.3     | (15.4-17.1) |          | 284      | 16.4     | (14.1-18.8) |          | 116      | 16.7     | (13.4-20.4) |          | 44               | 14.5     | (9.9-19.9)  |          |  |
| 2004-2008      | 2690     | 17.6     | (16.9-18.4) |          | 2176     | 17.6     | (16.7-18.4) |          | 331      | 19.2     | (16.8-21.6) |          | 132      | 17.4     | (14.2-20.9) |          | 51               | 13       | (8.8-18.1)  |          |  |
| 2005-2009      | 3086     | 18.9     | (18.2-19.7) |          | 2478     | 18.6     | (17.8-19.5) |          | 381      | 21.6     | (19.2-24.1) |          | 159      | 19.6     | (16.4-23.1) |          | 70               | 16.8     | (12.3-21.9) |          |  |
| 2006-2010      | 3559     | 20.5     | (19.7-21.2) |          | 2890     | 20.2     | (19.4-21.1) |          | 416      | 22.3     | (19.9-24.7) |          | 178      | 21.6     | (18.3-25.1) |          | 77               | 19       | (14.4-24.2) |          |  |
| 2007-2011      | 3981     | 21.5     | (20.8-22.3) |          | 3193     | 21       | (20.1-21.8) |          | 472      | 24.6     | (22.3-27.1) |          | 224      | 23.2     | (19.9-26.5) |          | 92               | 22.2     | (17.4-27.4) |          |  |
| 2008-2012      | 4528     | 23.0     | (22.2-23.7) |          | 3598     | 22.3     | (21.4-23.1) |          | 560      | 28       | (25.6-30.4) |          | 262      | 24.1     | (21-27.4)   |          | 111              | 22.5     | (17.9-27.5) |          |  |
| 2009-2013      | 5203     | 24.3     | (23.6-25)   |          | 4125     | 23.6     | (22.8-24.4) |          | 664      | 29.7     | (27.4-32)   |          | 288      | 24.6     | (21.5-27.7) |          | 130              | 25.1     | (20.6-30)   |          |  |
| 2010-2014      | 5975     | 26.3     | (25.6-27)   |          | 4779     | 25.7     | (24.9-26.5) |          | 726      | 29.7     | (27.5-32)   |          | 319      | 26.6     | (23.5-29.7) |          | 143              | 26.6     | (22-31.4)   |          |  |
| 2011-2015      | 6681     | 27.7     | (27-28.4)   |          | 5309     | 27.1     | (26.3-27.9) |          | 856      | 33.1     | (30.9-35.3) |          | 361      | 26.5     | (23.7-29.5) |          | 156              | 25.4     | (21.1-30)   |          |  |
| 2012-2016      | 7246     | 28.4     | (27.7-29.1) |          | 5787     | 27.8     | (27.1-28.6) |          | 914      | 32.9     | (30.8-35.1) |          |          |          | ShortFU     |          | 162              | 26.2     | (21.8-30.7) |          |  |
| Total Change*  |          | 15.9     |             |          |          | 15.4     |             |          |          | 18.6     |             |          |          | 15.5     |             |          |                  | 20.4     |             |          |  |
| <b>Females</b> |          |          |             |          |          |          |             |          |          |          |             |          |          |          |             |          |                  |          |             |          |  |
| 1997-2001      | 1013     | 13.7     | (12.7-14.8) |          | 812      | 13.6     | (12.4-14.8) |          | 119      | 13.7     | (10.6-17.1) |          | 63       | 17.7     | (13.3-22.7) |          | 17               | 6.1      | (2.5-12)    |          |  |
| 1998-2002      | 1076     | 14.1     | (13-15.2)   |          | 875      | 14       | (12.9-15.2) |          | 118      | 13.9     | (10.8-17.3) |          | 62       | 16.1     | (11.9-20.8) |          | 21               | 10.7     | (5.5-17.9)  |          |  |
| 1999-2003      | 1154     | 14.8     | (13.8-15.9) |          | 929      | 14.7     | (13.6-15.9) |          | 141      | 14.4     | (11.4-17.9) |          | 65       | 17.1     | (12.8-21.9) |          | 23               | 13.5     | (7.5-21.5)  |          |  |
| 2000-2004      | 1221     | 14.7     | (13.6-15.7) |          | 970      | 14.2     | (13.1-15.4) |          | 160      | 17.2     | (13.9-20.7) |          | 74       | 16.5     | (12.4-21.2) |          | 23               | 15.3     | (8.5-23.9)  |          |  |
| 2001-2005      | 1255     | 14.8     | (13.8-15.8) |          | 1003     | 14.4     | (13.3-15.5) |          | 158      | 17.5     | (14.3-21.1) |          | 76       | 15.4     | (11.6-19.8) |          | 26               | 19.7     | (11.7-29.3) |          |  |
| 2002-2006      | 1356     | 15.6     | (14.6-16.7) |          | 1089     | 15.5     | (14.4-16.6) |          | 168      | 16.7     | (13.5-20.1) |          | 78       | 14.7     | (11-19)     |          | 29               | 19.7     | (12.5-28.2) |          |  |
| 2003-2007      | 1422     | 15.8     | (14.8-16.8) |          | 1149     | 15.7     | (14.6-16.8) |          | 171      | 17.2     | (14.1-20.5) |          | 80       | 14.6     | (11-18.8)   |          | 20               | 12.4     | (6.9-19.7)  |          |  |
| 2004-2008      | 1533     | 16.3     | (15.3-17.3) |          | 1245     | 16.3     | (15.2-17.4) |          | 170      | 18.9     | (15.7-22.3) |          | 92       | 12.9     | (9.7-16.6)  |          | 22               | 11.4     | (6.4-18.1)  |          |  |
| 2005-2009      | 1765     | 18.0     | (17-19)     |          | 1466     | 18       | (16.9-19.1) |          | 172      | 19.8     | (16.5-23.2) |          | 95       | 15.8     | (12.3-19.8) |          | 34               | 16.6     | (10.6-23.8) |          |  |
| 2006-2010      | 1956     | 18.5     | (17.6-19.5) |          | 1626     | 18.1     | (17.1-19.2) |          | 192      | 22.9     | (19.5-26.5) |          | 102      | 17.8     | (14-21.9)   |          | 36               | 18.5     | (12.4-25.6) |          |  |
| 2007-2011      | 2147     | 19.5     | (18.6-20.5) |          | 1773     | 18.9     | (17.9-20)   |          | 207      | 24.5     | (21.1-28.1) |          | 124      | 18.9     | (15.2-23)   |          | 45               | 22.1     | (15.6-29.5) |          |  |
| 2008-2012      | 2387     | 20.9     | (20-21.9)   |          | 1967     | 20.3     | (19.3-21.3) |          | 232      | 25.2     | (21.9-28.7) |          | 142      | 21.8     | (17.8-26)   |          | 49               | 26.5     | (19.1-34.4) |          |  |
| 2009-2013      | 2715     | 22.0     | (21.1-22.9) |          | 2228     | 21.1     | (20.1-22.1) |          | 278      | 27.8     | (24.5-31.2) |          | 156      | 24.4     | (20.4-28.7) |          | 58               | 29.6     | (22.3-37.3) |          |  |
| 2010-2014      | 2949     | 22.8     | (21.9-23.7) |          | 2401     | 22       | (21-23)     |          | 326      | 28.4     | (25.3-31.7) |          | 157      | 23.4     | (19.4-27.6) |          | 64               | 28.9     | (22.2-36.1) |          |  |
| 2011-2015      | 3265     | 24.1     | (23.2-25)   |          | 2667     | 23.6     | (22.6-24.6) |          | 353      | 27.7     | (24.7-30.8) |          | 168      | 23.5     | (19.6-27.5) |          | 78               | 27.1     | (20.9-33.7) |          |  |
| 2012-2016      | 3524     | 25.0     | (24.1-25.9) |          | 2916     | 24.7     | (23.7-25.7) |          | 374      | 28.4     | (25.5-31.4) |          |          |          | ShortFU     |          | 80               | 25.8     | (19.9-32)   |          |  |
| Total Change*  |          | 11.3     |             |          |          | 11.1     |             |          |          | 14.7     |             |          |          | 5.8      |             |          |                  | 19.7     |             |          |  |



| HCC     |               | UK   |                  |          |      | England          |          |      |                  | Scotland |     |                  |          | Wales |                  |          |     | Northern Ireland |          |         |  |
|---------|---------------|------|------------------|----------|------|------------------|----------|------|------------------|----------|-----|------------------|----------|-------|------------------|----------|-----|------------------|----------|---------|--|
| Persons | Cohort        | Net  |                  | suppress | Net  |                  | suppress | Net  |                  | suppress | Net |                  | suppress | Net   |                  | suppress | Net |                  | suppress |         |  |
|         |               | N    | Survival CI      |          | N    | Survival CI      |          | N    | Survival CI      |          | N   | Survival CI      |          | N     | Survival CI      |          | N   | Survival CI      |          |         |  |
|         | 1997-2001     | 1085 | 15.4 (14.3-16.5) |          | 879  | 15.5 (14.3-16.7) |          | 148  | 15.6 (12.6-18.9) |          | 41  | 12.2 (8.3-16.9)  |          | 18    | 11.6 (5.7-19.8)  |          |     |                  |          |         |  |
|         | 1998-2002     | 1206 | 15.8 (14.8-16.9) |          | 990  | 16 (14.8-17.2)   |          | 149  | 15.9 (12.9-19.2) |          | 47  | 12.9 (9-17.5)    |          | 21    | 12.6 (7-20.1)    |          |     |                  |          |         |  |
|         | 1999-2003     | 1345 | 16.6 (15.6-17.7) |          | 1099 | 16.8 (15.7-18)   |          | 167  | 15.5 (12.7-18.6) |          | 50  | 14.6 (10.5-19.3) |          | 27    | 16.6 (10.2-24.4) |          |     |                  |          |         |  |
|         | 2000-2004     | 1473 | 17.0 (16-18.1)   |          | 1183 | 17 (15.9-18.2)   |          | 198  | 16.4 (13.6-19.3) |          | 59  | 16.5 (12.2-21.3) |          | 32    | 18.5 (11.8-26.6) |          |     |                  |          |         |  |
|         | 2001-2005     | 1600 | 17.1 (16.2-18.1) |          | 1284 | 17.2 (16.1-18.3) |          | 219  | 17.1 (14.4-20)   |          | 64  | 16.3 (12.2-21)   |          | 34    | 17.3 (11.2-24.7) |          |     |                  |          |         |  |
|         | 2002-2006     | 1794 | 18.2 (17.2-19.2) |          | 1436 | 18.3 (17.3-19.4) |          | 249  | 17.1 (14.6-19.9) |          | 72  | 16.8 (12.8-21.4) |          | 40    | 19.9 (13.7-27.1) |          |     |                  |          |         |  |
|         | 2003-2007     | 2035 | 19.2 (18.2-20.1) |          | 1618 | 19.3 (18.2-20.3) |          | 279  | 18.6 (16.1-21.3) |          | 87  | 17.2 (13.3-21.5) |          | 52    | 22.8 (16.5-29.7) |          |     |                  |          |         |  |
|         | 2004-2008     | 2307 | 20.5 (19.6-21.5) |          | 1820 | 20.6 (19.6-21.7) |          | 327  | 21.9 (19.3-24.6) |          | 107 | 17.3 (13.7-21.3) |          | 56    | 18.2 (12.9-24.2) |          |     |                  |          |         |  |
|         | 2005-2009     | 2664 | 21.9 (21-22.8)   |          | 2097 | 21.8 (20.8-22.9) |          | 374  | 24.1 (21.5-26.8) |          | 133 | 20.4 (16.7-24.3) |          | 70    | 19.1 (14.1-24.8) |          |     |                  |          |         |  |
|         | 2006-2010     | 3099 | 23.5 (22.6-24.4) |          | 2456 | 23.3 (22.3-24.3) |          | 413  | 25.5 (23-28.2)   |          | 154 | 23.5 (19.8-27.5) |          | 77    | 22.2 (17-27.9)   |          |     |                  |          |         |  |
|         | 2007-2011     | 3537 | 24.9 (24.1-25.8) |          | 2754 | 24.3 (23.3-25.3) |          | 483  | 28.7 (26.1-31.3) |          | 206 | 26.4 (22.7-30.2) |          | 94    | 23.7 (18.6-29.1) |          |     |                  |          |         |  |
|         | 2008-2012     | 4030 | 27.1 (26.2-28)   |          | 3105 | 26.2 (25.2-27.2) |          | 583  | 32.6 (30-35.2)   |          | 238 | 29 (25.3-32.7)   |          | 108   | 25.7 (20.7-31.2) |          |     |                  |          |         |  |
|         | 2009-2013     | 4679 | 28.5 (27.7-29.4) |          | 3585 | 27.4 (26.5-28.4) |          | 700  | 35.0 (32.5-37.5) |          | 264 | 29.9 (26.3-33.6) |          | 134   | 28.5 (23.5-33.7) |          |     |                  |          |         |  |
|         | 2010-2014     | 5408 | 30.8 (30-31.7)   |          | 4187 | 30 (29-30.9)     |          | 778  | 35.6 (33.2-38)   |          | 284 | 31.4 (27.8-35)   |          | 155   | 31.7 (26.8-36.7) |          |     |                  |          |         |  |
|         | 2011-2015     | 6171 | 33.0 (32.2-33.8) |          | 4759 | 32.2 (31.3-33.1) |          | 913  | 38.9 (36.6-41.3) |          | 326 | 32.1 (28.7-35.5) |          | 180   | 30.9 (26.2-35.7) |          |     |                  |          |         |  |
|         | 2012-2016     | 6783 | 33.8 (33-34.6)   |          | 5277 | 33.1 (32.2-34)   |          | 1002 | 39.7 (37.4-42)   |          |     |                  | ShortFU  | 185   | 31.4 (26.8-36)   |          |     |                  |          |         |  |
|         | Total Change* |      | 18.4             |          |      | 17.6             |          |      | 24.1             |          |     | 19.9             |          |       | 19.8             |          |     |                  |          |         |  |
| Males   | 1997-2001     | 770  | 14.8 (13.6-16.1) |          | 620  | 14.8 (13.5-16.2) |          | 109  | 16.5 (12.9-20.4) |          | 27  | 10.2 (6.1-15.6)  |          | 10    | 8.5 (2.9-18.2)   |          |     |                  |          |         |  |
|         | 1998-2002     | 878  | 15.4 (14.2-16.6) |          | 716  | 15.4 (14.1-16.8) |          | 115  | 16.8 (13.3-20.7) |          | 33  | 11.8 (7.5-17.3)  |          | 13    | 9.6 (4.1-18.4)   |          |     |                  |          |         |  |
|         | 1999-2003     | 982  | 16.0 (14.9-17.2) |          | 801  | 16.1 (14.8-17.4) |          | 125  | 16.1 (12.8-19.7) |          | 37  | 13.8 (9.2-19.4)  |          | 15    | 12.4 (6.1-21.2)  |          |     |                  |          |         |  |
|         | 2000-2004     | 1085 | 16.4 (15.3-17.5) |          | 879  | 16.5 (15.2-17.8) |          | 141  | 15.5 (12.4-18.8) |          | 42  | 15.6 (10.8-21.4) |          | 18    | 14.8 (7.9-24)    |          |     |                  |          |         |  |
|         | 2001-2005     | 1183 | 16.7 (15.6-17.8) |          | 956  | 16.8 (15.6-18.1) |          | 161  | 16.4 (13.4-19.7) |          | 46  | 16.2 (11.3-21.9) |          | 19    | 13.9 (7.6-22.2)  |          |     |                  |          |         |  |
|         | 2002-2006     | 1349 | 17.6 (16.5-18.7) |          | 1093 | 17.8 (16.6-19.1) |          | 178  | 16.2 (13.4-19.4) |          | 54  | 17.5 (12.6-23)   |          | 25    | 17.1 (10.5-25.2) |          |     |                  |          |         |  |
|         | 2003-2007     | 1537 | 18.6 (17.5-19.7) |          | 1232 | 18.7 (17.5-19.9) |          | 205  | 17.7 (14.9-20.8) |          | 66  | 18.2 (13.6-23.4) |          | 35    | 21.7 (14.7-29.6) |          |     |                  |          |         |  |
|         | 2004-2008     | 1770 | 20.2 (19.1-21.3) |          | 1405 | 20.1 (19-21.4)   |          | 247  | 21.4 (18.5-24.5) |          | 80  | 19.2 (14.8-24)   |          | 41    | 18.1 (12.1-25.2) |          |     |                  |          |         |  |
|         | 2005-2009     | 2060 | 21.8 (20.7-22.8) |          | 1614 | 21.5 (20.3-22.7) |          | 291  | 23.9 (20.9-27)   |          | 108 | 22.9 (18.4-27.6) |          | 54    | 20.1 (14.3-26.7) |          |     |                  |          |         |  |
|         | 2006-2010     | 2409 | 23.5 (22.5-24.5) |          | 1905 | 23.2 (22-24.3)   |          | 321  | 24.8 (22-27.8)   |          | 124 | 25.2 (20.8-29.9) |          | 63    | 24.6 (18.4-31.3) |          |     |                  |          |         |  |
|         | 2007-2011     | 2733 | 24.9 (23.9-25.9) |          | 2114 | 24.1 (23-25.2)   |          | 384  | 28.3 (25.4-31.2) |          | 163 | 27.7 (23.5-32.2) |          | 76    | 26.1 (20-32.6)   |          |     |                  |          |         |  |
|         | 2008-2012     | 3116 | 27.0 (26-28)     |          | 2384 | 26 (24.9-27.1)   |          | 463  | 32.3 (29.4-35.2) |          | 187 | 29.2 (25.1-33.5) |          | 89    | 27.1 (21.2-33.3) |          |     |                  |          |         |  |
|         | 2009-2013     | 3607 | 28.3 (27.3-29.3) |          | 2743 | 27.3 (26.2-28.4) |          | 555  | 33.9 (31.2-36.7) |          | 208 | 28.9 (24.9-32.9) |          | 107   | 29.5 (23.7-35.5) |          |     |                  |          |         |  |
|         | 2010-2014     | 4185 | 30.5 (29.6-31.4) |          | 3239 | 29.8 (28.7-30.8) |          | 601  | 34.2 (31.6-36.9) |          | 219 | 30.2 (26.3-34.3) |          | 121   | 32.1 (26.4-37.9) |          |     |                  |          |         |  |
|         | 2011-2015     | 4780 | 32.7 (31.8-33.6) |          | 3684 | 32 (30.9-33)     |          | 718  | 38.6 (36-41.3)   |          | 255 | 30.8 (27.1-34.6) |          | 129   | 30.1 (24.7-35.7) |          |     |                  |          |         |  |
|         | 2012-2016     | 5243 | 33.3 (32.4-34.2) |          | 4076 | 32.7 (31.7-33.7) |          | 778  | 38.5 (36-41.1)   |          |     |                  | ShortFU  | 130   | 30.1 (24.8-35.5) |          |     |                  |          |         |  |
|         | Total Change* |      | 18.5             |          |      | 17.9             |          |      | 22.0             |          |     | 20.6             |          |       | 21.6             |          |     |                  |          |         |  |
| Females | 1997-2001     | 325  | 17.5 (15.3-19.7) |          | 266  | 17.7 (15.3-20.2) |          | 40   | 14.7 (9.3-21.4)  |          | 14  | 16.2 (8.5-26.1)  |          |       |                  |          |     |                  |          | <10     |  |
|         | 1998-2002     | 336  | 17.4 (15.3-19.6) |          | 280  | 17.9 (15.6-20.4) |          | 39   | 14.3 (9-20.9)    |          | 13  | 13.8 (7.1-22.7)  |          |       |                  |          |     |                  |          | <10     |  |
|         | 1999-2003     | 374  | 19.1 (16.9-21.3) |          | 307  | 19.6 (17.2-22.1) |          | 46   | 13.8 (8.8-20)    |          | 13  | 16.6 (9.2-26)    |          | 13    | 30.3 (15.7-46.8) |          |     |                  |          |         |  |
|         | 2000-2004     | 400  | 19.7 (17.6-21.9) |          | 317  | 19.7 (17.3-22.2) |          | 56   | 19.3 (13.6-25.8) |          | 18  | 19.4 (11.3-29.3) |          | 15    | 28.3 (14-44.9)   |          |     |                  |          |         |  |
|         | 2001-2005     | 431  | 19.1 (17-21.2)   |          | 339  | 19 (16.7-21.4)   |          | 62   | 19.7 (14.2-26.1) |          | 19  | 16.9 (9.7-25.7)  |          | 17    | 28.5 (14.8-44.1) |          |     |                  |          |         |  |
|         | 2002-2006     | 455  | 20.4 (18.4-22.6) |          | 351  | 20.7 (18.4-23.1) |          | 73   | 20.1 (14.8-26.1) |          | 19  | 15.5 (8.8-24)    |          | 16    | 29.2 (15.5-44.7) |          |     |                  |          |         |  |
|         | 2003-2007     | 507  | 21.6 (19.5-23.7) |          | 393  | 21.9 (19.6-24.3) |          | 77   | 22.2 (16.8-28.1) |          | 22  | 14.8 (8.4-23)    |          | 17    | 24 (12.1-38.5)   |          |     |                  |          |         |  |
|         | 2004-2008     | 542  | 22 (20-24.1)     |          | 419  | 22.7 (20.4-25.1) |          | 83   | 24.3 (18.8-30.3) |          | 27  | 12.8 (7.3-20)    |          | 13    | 14.9 (6.4-26.8)  |          |     |                  |          |         |  |
|         | 2005-2009     | 612  | 22.7 (20.7-24.7) |          | 487  | 23.4 (21.2-25.7) |          | 86   | 25.8 (20.2-31.7) |          | 28  | 15.7 (9.6-23.3)  |          | 16    | 15.6 (7.2-27.1)  |          |     |                  |          |         |  |
|         | 2006-2010     | 696  | 23.9 (22-25.9)   |          | 553  | 23.9 (21.8-26.1) |          | 97   | 29.2 (23.5-35.1) |          | 31  | 18.6 (11.9-26.4) |          |       |                  |          |     |                  |          | 2yr>1yr |  |
|         | 2007-2011     | 806  | 25.4 (23.5-27.3) |          | 641  | 25.1 (23-27.2)   |          | 104  | 31.6 (25.8-37.5) |          | 43  | 22.2 (15.2-30)   |          | 19    | 15.7 (7.9-25.9)  |          |     |                  |          |         |  |
|         | 2008-2012     | 917  | 27.6 (25.8-29.5) |          | 723  | 26.9 (24.9-29)   |          | 123  | 34.0 (28.4-39.8) |          | 51  | 28.5 (20.9-36.6) |          | 22    | 20.1 (11.2-31)   |          |     |                  |          |         |  |
|         | 2009-2013     | 1081 | 29.7 (27.9-31.5) |          | 846  | 28.2 (26.2-30.2) |          | 150  | 39.5 (33.9-45.2) |          | 58  | 35.5 (27.3-43.8) |          | 30    | 27 (17.3-37.7)   |          |     |                  |          |         |  |
|         | 2010-2014     | 1228 | 32.2 (30.5-34)   |          | 951  | 30.8 (28.8-32.8) |          | 176  | 40.1 (34.7-45.4) |          | 65  | 36.3 (28.3-44.4) |          | 39    | 32.6 (22.9-42.8) |          |     |                  |          |         |  |
|         | 2011-2015     | 1391 | 34 (32.3-35.7)   |          | 1073 | 32.9 (31-34.9)   |          | 198  | 41.1 (36-46.2)   |          | 68  | 36.5 (28.8-44.3) |          | 53    | 33.3 (24.4-42.6) |          |     |                  |          |         |  |
|         | 2012-2016     | 1546 | 35.9 (34.2-37.6) |          | 1205 | 34.9 (33-36.8)   |          | 225  | 44.4 (39.4-49.3) |          |     |                  | ShortFU  | 55    | 33.4 (24.7-42.3) |          |     |                  |          |         |  |
|         | Total Change* |      | 18.4             |          |      | 17.2             |          |      | 29.7             |          |     | 20.3             |          |       | NC               |          |     |                  |          |         |  |

| ICCA    |               | UK   |                  |          |      | England          |          |     |                  | Scotland |     |                  |          | Wales |                  |          |     | Northern Ireland |          |  |  |
|---------|---------------|------|------------------|----------|------|------------------|----------|-----|------------------|----------|-----|------------------|----------|-------|------------------|----------|-----|------------------|----------|--|--|
| Persons | Cohort        | Net  |                  | suppress | Net  |                  | suppress | Net |                  | suppress | Net |                  | suppress | Net   |                  | suppress | Net |                  | suppress |  |  |
|         |               | N    | Survival CI      |          | N    | Survival CI      |          | N   | Survival CI      |          | N   | Survival CI      |          | N     | Survival CI      |          | N   | Survival CI      |          |  |  |
|         | 1997-2001     | 993  | 11.0 (10.1-12)   |          | 791  | 10.7 (9.7-11.8)  |          | 118 | 11.9 (9.1-15.1)  |          | 67  | 18.7 (14-23.8)   |          | 15    | 2.4 (0.6-7)      |          |     |                  |          |  |  |
|         | 1998-2002     | 1054 | 11.2 (10.3-12.2) |          | 851  | 11.1 (10.1-12.2) |          | 116 | 11.8 (9-15)      |          | 74  | 15 (11-19.7)     |          |       |                  |          |     |                  | 2yr>1yr  |  |  |
|         | 1999-2003     | 1126 | 11.6 (10.7-12.6) |          | 908  | 11.4 (10.4-12.5) |          | 125 | 12.2 (9.3-15.4)  |          | 77  | 15.3 (11.3-19.8) |          |       |                  |          |     |                  | 2yr>1yr  |  |  |
|         | 2000-2004     | 1205 | 11.4 (10.5-12.4) |          | 971  | 11.2 (10.2-12.2) |          | 137 | 13.2 (10.3-16.4) |          | 87  | 14.3 (10.7-18.6) |          |       |                  |          |     |                  | 2yr>1yr  |  |  |
|         | 2001-2005     | 1226 | 11.6 (10.7-12.5) |          | 996  | 11.3 (10.4-12.3) |          | 129 | 13.1 (10.2-16.3) |          | 88  | 14.7 (11-18.9)   |          | 12    | 7.3 (2.8-14.8)   |          |     |                  |          |  |  |
|         | 2002-2006     | 1327 | 11.8 (11-12.7)   |          | 1076 | 11.6 (10.7-12.6) |          | 136 | 12.6 (9.8-15.7)  |          | 94  | 14.7 (11.2-18.8) |          | 18    | 7.4 (3.5-13.4)   |          |     |                  |          |  |  |
|         | 2003-2007     | 1386 | 12.0 (11.2-12.9) |          | 1130 | 11.7 (10.8-12.7) |          | 151 | 13.8 (11-16.9)   |          | 95  | 15.1 (11.7-19)   |          | 13    | 3.7 (1.1-8.8)    |          |     |                  |          |  |  |
|         | 2004-2008     | 1491 | 12.3 (11.4-13.1) |          | 1217 | 12 (11.1-12.9)   |          | 154 | 15.3 (12.4-18.5) |          | 106 | 14 (10.8-17.6)   |          | 21    | 6.7 (3-12.6)     |          |     |                  |          |  |  |
|         | 2005-2009     | 1642 | 13.0 (12.2-13.9) |          | 1352 | 12.6 (11.7-13.5) |          | 164 | 16.4 (13.4-19.7) |          | 106 | 15.6 (12.3-19.3) |          | 30    | 11.5 (6.4-18.3)  |          |     |                  |          |  |  |
|         | 2006-2010     | 1763 | 13.1 (12.3-13.9) |          | 1460 | 12.7 (11.8-13.5) |          | 175 | 17.3 (14.2-20.6) |          | 116 | 16.1 (12.8-19.9) |          | 26    | 11 (5.9-17.9)    |          |     |                  |          |  |  |
|         | 2007-2011     | 1896 | 13.5 (12.7-14.3) |          | 1578 | 13.2 (12.3-14.1) |          | 176 | 16.8 (13.8-20)   |          | 120 | 13.2 (10.2-16.7) |          | 26    | 16.7 (9.9-25)    |          |     |                  |          |  |  |
|         | 2008-2012     | 2039 | 13.8 (13-14.6)   |          | 1680 | 13.5 (12.6-14.3) |          | 189 | 16.1 (13.3-19.2) |          | 139 | 13.7 (10.7-17.1) |          | 31    | 17.8 (11-26)     |          |     |                  |          |  |  |
|         | 2009-2013     | 2213 | 14.1 (13.4-14.9) |          | 1817 | 13.8 (12.9-14.6) |          | 219 | 15.9 (13.2-18.7) |          | 143 | 15 (11.9-18.5)   |          | 33    | 20.2 (13.1-28.5) |          |     |                  |          |  |  |
|         | 2010-2014     | 2393 | 14.8 (14-15.6)   |          | 1956 | 14.6 (13.9-15.5) |          | 253 | 16.5 (13.9-19.3) |          | 154 | 15.2 (12.1-18.6) |          | 31    | 17.2 (10.9-24.8) |          |     |                  |          |  |  |
|         | 2011-2015     | 2596 | 15.3 (14.5-16.1) |          | 2132 | 15.4 (14.5-16.2) |          | 270 | 15.3 (13-17.9)   |          | 157 | 14.1 (11.3-17.3) |          | 36    | 14.4 (9.1-20.9)  |          |     |                  |          |  |  |
|         | 2012-2016     | 2739 | 15.8 (15-16.6)   |          | 2273 | 16.1 (15.3-17)   |          | 255 | 13.4 (11.2-15.8) |          |     |                  | ShortFU  | 42    | 14.6 (9.4-20.8)  |          |     |                  |          |  |  |
|         | Total Change* |      | 4.8              |          |      | 5.4              |          |     | 1.5              |          |     | -4.6             |          |       | 12.2             |          |     |                  |          |  |  |
| Males   | 1997-2001     | 452  | 10.6 (9.2-12)    |          | 365  | 10.5 (9.1-12.1)  |          | 52  | 11.2 (7.2-16.2)  |          | 23  | 12.3 (6.9-19.4)  |          |       |                  |          |     |                  | Insuff   |  |  |
|         | 1998-2002     | 460  | 10.4 (9.1-11.8)  |          | 381  | 10.5 (9.1-12.1)  |          | 46  | 9.5 (5.9-14.2)   |          | 32  | 13.3 (7.8-20.3)  |          |       |                  |          |     |                  | Insuff   |  |  |
|         | 1999-2003     | 501  | 11.0 (9.7-12.3)  |          | 421  | 11.2 (9.8-12.8)  |          | 44  | 8.4 (5-12.9)     |          | 33  | 14.1 (8.6-21)    |          |       |                  |          |     |                  | Insuff   |  |  |
|         | 2000-2004     | 535  | 11.1 (9.9-12.5)  |          | 448  | 11.3 (9.9-12.8)  |          | 48  | 8.5 (5.1-12.9)   |          | 37  | 14.5 (9-21.1)    |          |       |                  |          |     |                  | Insuff   |  |  |
|         | 2001-2005     | 561  | 11.3 (10.1-12.7) |          | 467  | 11.2 (9.9-12.7)  |          | 48  | 9.8 (6.3-14.3)   |          | 40  | 15.9 (10.3-22.6) |          |       |                  |          |     |                  | Insuff   |  |  |
|         | 2002-2006     | 612  | 11.5 (10.3-12.8) |          | 503  | 11.4 (10.1-12.9) |          | 60  | 11.9 (8.1-16.4)  |          | 40  | 15.5 (10.2-22)   |          |       |                  |          |     |                  | <10      |  |  |
|         | 2003-2007     | 656  | 12.3 (11.1-13.6) |          | 536  | 12.1 (10.8-13.6) |          | 70  | 13.4 (9.6-18)    |          | 43  | 15.7 (10.5-21.8) |          |       |                  |          |     |                  | <10      |  |  |
|         | 2004-2008     | 709  | 12.7 (11.5-13.9) |          | 577  | 12.5 (11.2-13.9) |          | 79  | 15.4 (11.2-20.2) |          | 46  | 15.8 (10.9-21.6) |          | 12    | 5 (1.2-13.3)     |          |     |                  |          |  |  |
|         | 2005-2009     | 770  | 12.9 (11.7-14.1) |          | 625  | 12.4 (11.2-13.8) |          | 89  | 17.4 (13-22.3)   |          | 46  | 15.3 (10.7-20.8) |          | 15    | 8.7 (3.2-18)     |          |     |                  |          |  |  |
|         | 2006-2010     | 838  | 13.3 (12.1-14.5) |          | 690  | 13.1 (11.8-14.4) |          | 92  | 16.7 (12.4-21.6) |          | 53  | 17.4 (12.5-23.1) |          | 13    | 5.7 (1.5-14.1)   |          |     |                  |          |  |  |
|         | 2007-2011     | 905  | 13.5 (12.4-14.7) |          | 759  | 13.5 (12.3-14.8) |          | 84  | 14.7 (10.7-19.5) |          | 52  | 13 (8.8-18.1)    |          | 13    | 13.8 (5.9-25.2)  |          |     |                  |          |  |  |
|         | 2008-2012     | 981  | 13.3 (12.2-14.5) |          | 810  | 13.1 (11.9-14.4) |          | 92  | 15.9 (11.8-20.5) |          | 62  | 13.2 (9.1-18.3)  |          | 17    | 14.5 (7-24.8)    |          |     |                  |          |  |  |
|         | 2009-2013     | 1060 | 13.9 (12.7-15)   |          | 877  | 13.7 (12.5-15)   |          | 102 | 15.5 (11.7-19.9) |          | 63  | 13.8 (9.5-18.9)  |          | 18    | 15.3 (7.6-25.7)  |          |     |                  |          |  |  |
|         | 2010-2014     | 1177 | 15.1 (14-16.3)   |          | 969  | 15.1 (13.8-16.4) |          | 116 | 15.4 (11.7-19.5) |          | 77  | 17.1 (12.5-22.4) |          | 17    | 15 (7.5-25.2)    |          |     |                  |          |  |  |
|         | 2011-2015     | 1250 | 15.1 (14-16.3)   |          | 1022 | 15.2 (13.9-16.4) |          | 129 | 15.8 (12.3-19.7) |          | 82  | 16.4 (12.1-21.2) |          | 20    | 12.5 (6.1-21.4)  |          |     |                  |          |  |  |
|         | 2012-2016     | 1310 | 15.9 (14.8-17.1) |          | 1071 | 16 (14.8-17.3)   |          | 125 | 15.0 (11.7-18.8) |          |     |                  | ShortFU  | 24    | 14.1 (7.1-23.5)  |          |     |                  |          |  |  |
|         | Total Change* |      | 5.3              |          |      | 5.5              |          |     | 3.8              |          |     | 4.1              |          |       | NC               |          |     |                  |          |  |  |
| Females | 1997-2001     | 556  | 11.9 (10.6-13.2) |          | 443  | 11.2 (9.8-12.7)  |          | 65  | 13.1 (9.3-17.6)  |          | 42  | 23.2 (16.5-30.6) |          |       |                  |          |     |                  | <10      |  |  |
|         | 1998-2002     | 606  | 12.3 (11-13.6)   |          | 481  | 11.8 (10.4-13.3) |          | 72  | 14.7 (10.7-19.3) |          | 43  | 16.9 (11.3-23.5) |          |       |                  |          |     |                  | 2yr>1yr  |  |  |
|         | 1999-2003     | 639  | 12.5 (11.2-13.9) |          | 498  | 11.8 (10.4-13.3) |          | 83  | 15.8 (11.6-20.6) |          | 45  | 16 (10.7-22.2)   |          | 15    | 16.8 (8.1-28.4)  |          |     |                  |          |  |  |
|         | 2000-2004     | 681  | 11.8 (10.6-13.1) |          | 530  | 11 (9.7-12.4)    |          | 93  | 17.6 (13.3-22.4) |          | 50  | 13.5 (8.9-19)    |          | 12    | 17.5 (7.9-30.4)  |          |     |                  |          |  |  |
|         | 2001-2005     | 675  | 12.0 (10.8-13.3) |          | 535  | 11.4 (10.1-12.7) |          | 86  | 16.9 (12.7-21.6) |          | 51  | 11.9 (7.6-17.1)  |          | 11    | 20.8 (9.2-35.8)  |          |     |                  |          |  |  |
|         | 2002-2006     | 723  | 12.2 (11-13.4)   |          | 577  | 11.7 (10.5-13.1) |          | 81  | 14.3 (10.4-18.9) |          | 59  | 13 (8.6-18.2)    |          | 12    | 16.2 (7.7-27.7)  |          |     |                  |          |  |  |
|         | 2003-2007     | 731  | 11.7 (10.5-12.9) |          | 594  | 11.3 (10.1-12.6) |          | 81  | 14.1 (10.4-18.5) |          | 54  | 13.1 (8.9-18.1)  |          |       |                  |          |     |                  | <10      |  |  |
|         | 2004-2008     | 783  | 11.8 (10.7-13)   |          | 640  | 11.4 (10.2-12.7) |          | 72  | 14.8 (11-19.3)   |          | 62  | 11.9 (8.1-16.6)  |          |       |                  |          |     |                  | <10      |  |  |
|         | 2005-2009     | 876  | 13.2 (12.1-14.4) |          | 730  | 12.8 (11.6-14)   |          | 73  | 15.5 (11.6-20)   |          | 63  | 16.3 (11.8-21.5) |          | 13    | 12.9 (5.7-23.2)  |          |     |                  |          |  |  |
|         | 2006-2010     | 926  | 12.9 (11.9-14.1) |          | 769  | 12.2 (11-13.4)   |          | 82  | 17.8 (13.7-22.5) |          | 63  | 15.7 (11.3-20.9) |          | 12    | 15.3 (7-26.6)    |          |     |                  |          |  |  |
|         | 2007-2011     | 989  | 13.5 (12.4-14.6) |          | 817  | 12.8 (11.7-14)   |          | 92  | 18.6 (14.5-23.2) |          | 68  | 15.3 (11-20.3)   |          | 15    | 25.9 (14.3-39.3) |          |     |                  |          |  |  |
|         | 2008-2012     | 1059 | 14.3 (13.2-15.4) |          | 870  | 13.9 (12.7-15.1) |          | 95  | 16.5 (12.7-20.7) |          | 77  | 15.4 (11.1-20.4) |          | 16    | 27.7 (15-42.3)   |          |     |                  |          |  |  |
|         | 2009-2013     | 1156 | 14.5 (13.4-15.6) |          | 943  | 13.9 (12.8-15.1) |          | 114 | 16.0 (12.5-19.9) |          | 80  | 16.7 (12.4-21.6) |          | 17    | 29.2 (16.6-43.2) |          |     |                  |          |  |  |
|         | 2010-2014     | 1216 | 14.5 (13.5-15.6) |          | 987  | 14.1 (13-15.3)   |          | 137 | 17.7 (14.1-21.5) |          | 75  | 14.5 (10.5-19.2) |          | 16    | 20.1 (10.6-32.1) |          |     |                  |          |  |  |
|         | 2011-2015     | 1351 | 15.6 (14.6-16.7) |          | 1115 | 15.7 (14.6-16.9) |          | 139 | 14.9 (11.8-18.4) |          | 77  | 14.2 (10.3-18.7) |          | 17    | 17.6 (9.6-27.7)  |          |     |                  |          |  |  |
|         | 2012-2016     | 1440 | 15.9 (14.8-16.9) |          | 1214 | 16.4 (15.2-17.6) |          | 130 | 12.2 (9.4-15.3)  |          |     |                  | ShortFU  | 21    | 15.8 (8.7-24.8)  |          |     |                  |          |  |  |
|         | Total Change* |      | 4.0              |          |      | 5.2              |          |     | -0.9             |          |     | -9.0             |          |       | NC               |          |     |                  |          |  |  |

| Other   |               | UK       |          |             | England  |          |          | Scotland    |          |          | Wales    |             |          | Northern Ireland |          |             |             |         |             |             |
|---------|---------------|----------|----------|-------------|----------|----------|----------|-------------|----------|----------|----------|-------------|----------|------------------|----------|-------------|-------------|---------|-------------|-------------|
|         | Cohort        | Net<br>N | Survival | CI          | suppress | Net<br>N | Survival | CI          | suppress | Net<br>N | Survival | CI          | suppress | Net<br>N         | Survival | CI          | suppress    |         |             |             |
| Persons | 1997-2001     | 208      | 8.5      | (7.1-9.9)   |          | 172      | 8.7      | (7.2-10.3)  |          | 16       | 7.0      | (3.1-13.1)  |          |                  |          |             |             | <10     |             |             |
|         | 1998-2002     | 221      | 9.3      | (7.9-10.9)  |          | 188      | 9.3      | (7.8-11)    |          | 18       | 8.2      | (3.7-14.8)  |          |                  |          |             |             | <10     |             |             |
|         | 1999-2003     | 234      | 10.1     | (8.7-11.8)  |          | 198      | 9.9      | (8.3-11.6)  |          |          |          |             | 2yr>1yr  | 19               | 18.1     | (11.1-26.5) |             | <10     |             |             |
|         | 2000-2004     | 232      | 10.3     | (8.8-12.1)  |          | 195      | 9.9      | (8.3-11.8)  |          | 17       | 10.5     | (5.2-18.1)  |          |                  |          |             |             | <10     |             |             |
|         | 2001-2005     | 246      | 12.1     | (10.4-13.9) |          | 212      | 11.9     | (10.1-13.9) |          | 14       | 9.2      | (4.2-16.6)  |          |                  | 15       | 18.5        | (10.5-28.4) |         | <10         |             |
|         | 2002-2006     | 285      | 14.2     | (12.3-16.1) |          | 254      | 14.5     | (12.5-16.6) |          | 14       | 9.2      | (4.2-16.6)  |          |                  | 12       | 15.6        | (7.9-25.8)  |         | Insuff      |             |
|         | 2003-2007     | 313      | 15.1     | (13.2-17.1) |          | 282      | 15.8     | (13.8-18)   |          | 16       | 6.6      | (2.7-12.9)  |          |                  |          |             |             | <10     | Insuff      |             |
|         | 2004-2008     | 376      | 17.3     | (15.4-19.3) |          | 348      | 18.4     | (16.3-20.5) |          | 14       | 5.3      | (2-11.1)    |          |                  |          |             |             | <10     | Insuff      |             |
|         | 2005-2009     | 488      | 21.3     | (19.3-23.3) |          | 456      | 22.2     | (20.2-24.4) |          | 12       | 5.7      | (2.2-11.8)  |          |                  |          |             |             | <10     | Insuff      |             |
|         | 2006-2010     | 594      | 23.3     | (21.4-25.3) |          | 556      | 24.4     | (22.3-26.5) |          | 14       | 4.1      | (1.3-9.5)   |          |                  | 12       | 22.6        | (11.6-36.1) |         | <10         |             |
|         | 2007-2011     | 651      | 23.9     | (22.1-25.9) |          | 600      | 24.6     | (22.6-26.6) |          | 16       | 8.4      | (4-15)      |          |                  | 19       | 30          | (18.1-43.1) | 15      | 21.1        | (11.8-32.4) |
|         | 2008-2012     | 778      | 24.3     | (22.5-26.1) |          | 722      | 24.7     | (22.8-26.6) |          |          |          |             | 2yr>1yr  | 24               | 30.3     | (19.4-42.2) | 18          | 21.6    | (12.1-33)   |             |
|         | 2009-2013     | 944      | 25.7     | (24-27.4)   |          | 881      | 26       | (24.3-27.9) |          | 13       | 10.9     | (5.3-18.8)  |          |                  |          | Insuff      | 18          | 23      | (13.2-34.6) |             |
|         | 2010-2014     | 1041     | 25.0     | (23.4-26.6) |          | 969      | 25.2     | (23.5-26.9) |          | 18       | 12.7     | (6.7-20.7)  |          |                  | 36       | 34.5        | (24.3-45.1) | 19      | 22.4        | (12.7-34)   |
|         | 2011-2015     | 1089     | 24.6     | (23-26.2)   |          | 1012     | 24.6     | (23-26.3)   |          | 20       | 20.8     | (12.4-30.8) |          |                  | 40       | 32.6        | (23.1-42.5) | 22      | 15.6        | (7.2-27.1)  |
|         | 2012-2016     | 1139     | 24.4     | (22.9-26)   |          | 1066     | 24.5     | (22.9-26.2) |          | 14       | 12.7     | (6.1-21.9)  |          |                  |          | ShortFU     | 18          | 10      | (3.3-21.4)  |             |
|         | Total Change* |          | 15.9     |             |          | 15.8     |          |             |          |          | 5.7      |             |          | NC               |          |             | NC          |         |             |             |
| Males   | 1997-2001     | 104      | 6.8      | (5.3-8.6)   |          | 85       | 6.8      | (5.2-8.8)   |          |          |          |             | <10      |                  |          |             |             | SE>0.2  |             |             |
|         | 1998-2002     | 114      | 7.4      | (5.8-9.3)   |          | 93       | 7.1      | (5.4-9.1)   |          |          |          |             | <10      |                  |          |             |             | <10     |             |             |
|         | 1999-2003     | 112      | 8.0      | (6.3-9.9)   |          | 90       | 7.3      | (5.6-9.4)   |          |          |          |             | <10      |                  |          |             |             | 2yr>1yr |             |             |
|         | 2000-2004     | 113      | 8.6      | (6.7-10.7)  |          | 91       | 7.9      | (6-10.2)    |          |          |          |             | <10      |                  |          |             |             | 2yr>1yr |             |             |
|         | 2001-2005     | 118      | 10.1     | (8-12.4)    |          | 98       | 9.9      | (7.7-12.5)  |          |          |          |             | <10      |                  |          |             |             | <10     |             |             |
|         | 2002-2006     | 133      | 12.0     | (9.8-14.5)  |          | 117      | 12.3     | (9.9-15.1)  |          |          |          |             | <10      |                  |          |             |             | <10     |             |             |
|         | 2003-2007     | 157      | 13.6     | (11.2-16.1) |          | 142      | 14.2     | (11.7-17)   |          |          |          |             | Insuff   |                  |          |             |             | <10     |             |             |
|         | 2004-2008     | 196      | 15.7     | (13.3-18.2) |          | 184      | 16.7     | (14.1-19.5) |          |          |          |             | Insuff   |                  |          |             |             | <10     |             |             |
|         | 2005-2009     | 241      | 18.1     | (15.7-20.6) |          | 228      | 19.1     | (16.5-21.8) |          |          |          |             | Insuff   |                  |          |             |             | <10     |             |             |
|         | 2006-2010     | 300      | 21.1     | (18.7-23.6) |          | 285      | 22.4     | (19.8-25.1) |          |          |          |             | Insuff   |                  |          |             |             | <10     |             |             |
|         | 2007-2011     | 335      | 21.6     | (19.2-24)   |          | 316      | 22.7     | (20.2-25.4) |          |          |          |             | <10      |                  |          |             |             | <10     |             |             |
|         | 2008-2012     | 415      | 22.5     | (20.2-24.8) |          | 391      | 23.5     | (21.1-26)   |          |          |          |             | <10      |                  |          |             |             | <10     |             |             |
|         | 2009-2013     | 523      | 24.8     | (22.5-27)   |          | 493      | 25.6     | (23.3-28)   |          |          |          |             | <10      |                  |          |             |             | <10     |             |             |
|         | 2010-2014     | 600      | 25.3     | (23.1-27.5) |          | 561      | 25.9     | (23.6-28.2) |          | 11       | 10.4     | (4.1-20.2)  |          |                  | 18       | 26.3        | (15.1-39)   |         | <10         |             |
|         | 2011-2015     | 625      | 24.4     | (22.3-26.5) |          | 582      | 24.6     | (22.4-26.9) |          |          |          |             | <10      |                  | 18       | 23.4        | (13.3-35.4) |         | Insuff      |             |
|         | 2012-2016     | 663      | 24.1     | (22.1-26.2) |          | 615      | 24.3     | (22.1-26.5) |          |          |          |             | Insuff   |                  |          | ShortFU     |             |         | Insuff      |             |
|         | Total Change* |          | 17.3     |             |          | 17.5     |          |             |          | NC       |          |             |          | NC               |          |             | NC          |         |             |             |
| Females | 1997-2001     | 109      | 11.5     | (9.2-14.2)  |          | 93       | 12.2     | (9.6-15.2)  |          |          |          |             | <10      |                  |          |             |             | Insuff  |             |             |
|         | 1998-2002     | 112      | 12.8     | (10.3-15.7) |          | 101      | 13.5     | (10.7-16.6) |          |          |          |             | <10      |                  |          |             |             | Insuff  |             |             |
|         | 1999-2003     | 126      | 13.9     | (11.3-16.9) |          | 112      | 14.2     | (11.3-17.4) |          |          |          |             | <10      |                  |          |             |             | Insuff  |             |             |
|         | 2000-2004     | 121      | 13.2     | (10.5-16.2) |          | 105      | 13.2     | (10.3-16.4) |          |          |          |             | <10      |                  |          |             |             | Insuff  |             |             |
|         | 2001-2005     | 128      | 14.8     | (12-17.9)   |          | 113      | 14.5     | (11.6-17.8) |          |          |          |             | <10      |                  |          |             |             | Insuff  |             |             |
|         | 2002-2006     | 149      | 16.8     | (13.8-20)   |          | 135      | 17.3     | (14.1-20.7) |          |          |          |             | <10      |                  |          |             |             | Insuff  |             |             |
|         | 2003-2007     | 153      | 17.2     | (14.3-20.5) |          | 139      | 18.2     | (14.9-21.7) |          |          |          |             | <10      |                  |          |             |             | Insuff  |             |             |
|         | 2004-2008     | 180      | 19.6     | (16.6-22.8) |          | 165      | 20.7     | (17.4-24.2) |          |          |          |             | <10      |                  |          |             |             | Insuff  |             |             |
|         | 2005-2009     | 250      | 25.9     | (22.7-29.2) |          | 230      | 26.8     | (23.4-30.3) |          |          |          |             | <10      |                  |          |             |             | Insuff  |             |             |
|         | 2006-2010     | 301      | 26.9     | (23.9-30)   |          | 277      | 27.5     | (24.3-30.8) |          |          |          |             | SE>0.2   |                  |          |             |             | <10     |             |             |
|         | 2007-2011     | 320      | 27.5     | (24.5-30.6) |          | 288      | 27.3     | (24.1-30.6) |          |          |          |             | Insuff   |                  | 13       | 33.6        | (17.8-50.6) |         | Insuff      |             |
|         | 2008-2012     | 366      | 26.9     | (24.1-29.8) |          | 335      | 26.5     | (23.6-29.5) |          |          |          |             | Insuff   |                  | 14       | 38.4        | (21.2-56)   | 10      | 32.4        | (15.9-50.5) |
|         | 2009-2013     | 420      | 26.8     | (24.1-29.5) |          | 387      | 26.4     | (23.6-29.2) |          |          |          |             | Insuff   |                  |          | Insuff      | 10          | 32.6    | (16-50.8)   |             |
|         | 2010-2014     | 437      | 24.2     | (21.8-26.7) |          | 402      | 23.9     | (21.4-26.5) |          |          |          |             | <10      |                  |          |             |             |         | <10         |             |
|         | 2011-2015     | 462      | 24.8     | (22.4-27.3) |          | 426      | 24.5     | (22-27.1)   |          |          |          |             | <10      |                  | 23       | 41.1        | (24.8-57.3) |         | Insuff      |             |
|         | 2012-2016     | 475      | 25.0     | (22.6-27.4) |          | 449      | 25       | (22.6-27.5) |          |          |          |             | Insuff   |                  |          | ShortFU     |             |         | Insuff      |             |
|         | Total Change* |          | 13.5     |             |          | 12.8     |          |             |          | NC       |          |             |          | NC               |          |             | NC          |         |             |             |

\*Between 1997-2001 and 2012-2016 (2011-2015 for Wales). Suppressed results: Insuff, no deaths or data in at least one age band; <10, less than 10 cases in total; SE>0.2, standard error greater than 0.2; 2yr>1yr, 2yr survival longer than 1 year survival; NC: Not Calculatable

Table S8 Primary liver cancer five-year age-standardised net-survival by nation, sex, subtype and 5-year cohort

| Cohort         | UK       |          |             |          | England  |          |             |          | Scotland |          |             |          | Wales    |          |             |          | Northern Ireland |          |             |          |
|----------------|----------|----------|-------------|----------|----------|----------|-------------|----------|----------|----------|-------------|----------|----------|----------|-------------|----------|------------------|----------|-------------|----------|
|                | Net<br>N | Survival | CI          | suppress | Net<br>N | Survival | CI          | suppress | Net<br>N | Survival | CI          | suppress | Net<br>N | Survival | CI          | suppress | Net<br>N         | Survival | CI          | suppress |
| <b>PLC</b>     |          |          |             |          |          |          |             |          |          |          |             |          |          |          |             |          |                  |          |             |          |
| <b>Persons</b> |          |          |             |          |          |          |             |          |          |          |             |          |          |          |             |          |                  |          |             |          |
| 1997-2001      | 1300     | 7.2      | (6.7-7.8)   |          | 1053     | 7        | (6.4-7.6)   |          | 146      | 8.5      | (6.8-10.5)  |          | 81       | 9.1      | (6.8-11.8)  |          | 14               | 3.8      | (1.6-7.5)   |          |
| 1998-2002      | 1413     | 7.4      | (6.9-8)     |          | 1155     | 7.3      | (6.7-7.9)   |          | 151      | 7.9      | (6.2-9.8)   |          | 85       | 10       | (7.6-12.8)  |          | 18               | 3.3      | (1.4-6.7)   |          |
| 1999-2003      | 1544     | 7.9      | (7.4-8.5)   |          | 1264     | 7.8      | (7.2-8.4)   |          | 157      | 8.1      | (6.5-10)    |          | 98       | 11.1     | (8.6-13.9)  |          | 22               | 3.4      | (1.4-7.1)   |          |
| 2000-2004      | 1631     | 8.1      | (7.6-8.6)   |          | 1323     | 7.9      | (7.3-8.5)   |          | 181      | 8.7      | (7.1-10.6)  |          | 103      | 10.7     | (8.3-13.5)  |          | 24               | 5.3      | (2.6-9.6)   |          |
| 2001-2005      | 1746     | 8.1      | (7.6-8.7)   |          | 1417     | 7.9      | (7.4-8.5)   |          | 197      | 9.1      | (7.4-10.9)  |          | 105      | 10       | (7.7-12.6)  |          | 28               | 6.7      | (3.6-11.3)  |          |
| 2002-2006      | 1974     | 8.6      | (8.1-9.2)   |          | 1614     | 8.5      | (8-9.1)     |          | 215      | 9.4      | (7.8-11.2)  |          | 110      | 9.5      | (7.3-12)    |          | 36               | 7.1      | (4.2-11.2)  |          |
| 2003-2007      | 2194     | 9.2      | (8.7-9.7)   |          | 1778     | 9        | (8.4-9.6)   |          | 249      | 10.7     | (9.1-12.5)  |          | 122      | 9.4      | (7.3-11.8)  |          | 43               | 7.4      | (4.5-11.4)  |          |
| 2004-2008      | 2515     | 9.6      | (9.1-10.2)  |          | 2039     | 9.6      | (9-10.1)    |          | 301      | 11.4     | (9.8-13.2)  |          | 132      | 8.2      | (6.4-10.4)  |          | 43               | 6.6      | (4-10.1)    |          |
| 2005-2009      | 2957     | 10.7     | (10.2-11.3) |          | 2395     | 10.6     | (10-11.2)   |          | 344      | 13.3     | (11.6-15.2) |          | 161      | 10.2     | (8.2-12.5)  |          | 60               | 6.9      | (4.4-10.2)  |          |
| 2006-2010      | 3396     | 11.8     | (11.3-12.4) |          | 2752     | 11.6     | (11.1-12.2) |          | 387      | 14.3     | (12.6-16.2) |          | 188      | 12.3     | (10.1-14.7) |          | 72               | 9.1      | (6.3-12.5)  |          |
| 2007-2011      | 3811     | 12.5     | (12-13)     |          | 3047     | 12.1     | (11.5-12.7) |          | 454      | 15.8     | (14-17.7)   |          | 220      | 13.5     | (11.3-15.9) |          | 88               | 10.9     | (7.9-14.5)  |          |
| 2008-2012      | 4366     | 13.3     | (12.8-13.8) |          | 3477     | 12.9     | (12.4-13.5) |          | 540      | 16.7     | (14.9-18.5) |          | 253      | 14       | (11.9-16.3) |          | 99               | 12.7     | (9.6-16.4)  |          |
| 2009-2013      | 5018     | 14.3     | (13.8-14.8) |          | 3975     | 13.9     | (13.3-14.4) |          | 647      | 18.4     | (16.6-20.2) |          |          |          |             | ShortFU  | 123              | 14.2     | (11-17.9)   |          |
| Total Change*  |          | 7.1      |             |          |          | 6.9      |             |          |          | 9.9      |             |          |          | 4.9      |             |          |                  | 10.4     |             |          |
| <b>Males</b>   |          |          |             |          |          |          |             |          |          |          |             |          |          |          |             |          |                  |          |             |          |
| 1997-2001      | 760      | 7.1      | (6.4-7.8)   |          | 620      | 6.7      | (5.9-7.4)   |          | 91       | 10.3     | (7.8-13.2)  |          | 36       | 8.8      | (5.8-12.7)  |          |                  |          |             | <10      |
| 1998-2002      | 838      | 7.6      | (6.9-8.3)   |          | 687      | 7.2      | (6.4-7.9)   |          | 93       | 9.7      | (7.3-12.5)  |          | 44       | 10.9     | (7.5-15)    |          |                  |          |             | <10      |
| 1999-2003      | 924      | 8.0      | (7.3-8.7)   |          | 762      | 7.6      | (6.9-8.4)   |          | 94       | 9.3      | (7-12)      |          | 53       | 12.5     | (9-16.6)    |          | 10               | 3.6      | (1-9)       |          |
| 2000-2004      | 990      | 8.2      | (7.5-8.9)   |          | 815      | 7.9      | (7.2-8.7)   |          | 100      | 8.6      | (6.5-11)    |          | 58       | 11.4     | (8.1-15.4)  |          | 12               | 6.9      | (3-13.2)    |          |
| 2001-2005      | 1070     | 8.2      | (7.5-8.9)   |          | 879      | 8        | (7.3-8.8)   |          | 114      | 8.2      | (6.2-10.5)  |          | 59       | 10.6     | (7.5-14.4)  |          | 14               | 7        | (3.1-13.3)  |          |
| 2002-2006      | 1223     | 8.8      | (8.1-9.5)   |          | 1005     | 8.7      | (8-9.4)     |          | 132      | 9.0      | (7-11.2)    |          | 65       | 10.5     | (7.5-14.2)  |          | 19               | 6.9      | (3.4-12.2)  |          |
| 2003-2007      | 1393     | 9.3      | (8.7-10)    |          | 1129     | 9.1      | (8.4-9.9)   |          | 159      | 10.2     | (8.2-12.4)  |          | 74       | 11.4     | (8.4-15)    |          | 27               | 7        | (3.6-12.1)  |          |
| 2004-2008      | 1626     | 10.0     | (9.4-10.7)  |          | 1315     | 9.9      | (9.2-10.7)  |          | 199      | 11.5     | (9.5-13.8)  |          | 86       | 10       | (7.3-13.2)  |          | 27               | 6.2      | (3.2-10.7)  |          |
| 2005-2009      | 1908     | 11.1     | (10.4-11.8) |          | 1526     | 10.8     | (10.1-11.5) |          | 238      | 13.8     | (11.6-16.2) |          | 106      | 12.2     | (9.4-15.5)  |          | 39               | 6.2      | (3.3-10.3)  |          |
| 2006-2010      | 2230     | 12.4     | (11.7-13.1) |          | 1799     | 12.2     | (11.5-13)   |          | 263      | 14.4     | (12.3-16.8) |          | 124      | 14.4     | (11.4-17.8) |          | 48               | 7.5      | (4.4-11.6)  |          |
| 2007-2011      | 2505     | 13.0     | (12.3-13.7) |          | 1984     | 12.6     | (11.8-13.3) |          | 313      | 15.9     | (13.7-18.3) |          | 148      | 15.3     | (12.4-18.6) |          | 59               | 10.2     | (6.7-14.7)  |          |
| 2008-2012      | 2881     | 13.7     | (13.1-14.4) |          | 2267     | 13.4     | (12.7-14.1) |          | 380      | 16.9     | (14.7-19.2) |          | 169      | 14.3     | (11.6-17.3) |          | 67               | 11.7     | (8.1-16.2)  |          |
| 2009-2013      | 3330     | 14.8     | (14.1-15.4) |          | 2614     | 14.4     | (13.7-15.2) |          | 454      | 18.5     | (16.4-20.8) |          |          |          |             | ShortFU  | 82               | 13.7     | (9.9-18.2)  |          |
| Total Change*  |          | 7.7      |             |          |          | 7.7      |             |          |          | 8.2      |             |          |          | 5.5      |             |          |                  | NC       |             |          |
| <b>Females</b> |          |          |             |          |          |          |             |          |          |          |             |          |          |          |             |          |                  |          |             |          |
| 1997-2001      | 561      | 7.6      | (6.8-8.5)   |          | 446      | 7.7      | (6.8-8.7)   |          | 59       | 6.3      | (4.2-9.1)   |          | 45       | 10       | (6.5-14.2)  |          |                  |          |             | <10      |
| 1998-2002      | 592      | 7.4      | (6.6-8.2)   |          | 479      | 7.6      | (6.7-8.6)   |          | 61       | 5.6      | (3.6-8.2)   |          | 42       | 9        | (5.8-13.1)  |          | 10               | 1.8      | (0.3-6.6)   |          |
| 1999-2003      | 638      | 8.1      | (7.2-9)     |          | 515      | 8.3      | (7.4-9.3)   |          | 65       | 6.1      | (4-8.8)     |          | 45       | 9.5      | (6.2-13.6)  |          | 12               | 2        | (0.3-7.5)   |          |
| 2000-2004      | 657      | 8.1      | (7.3-9)     |          | 519      | 8        | (7.1-8.9)   |          | 82       | 8.9      | (6.4-12)    |          | 46       | 10       | (6.7-14.2)  |          | 13               | 2.3      | (0.3-8.5)   |          |
| 2001-2005      | 690      | 8.2      | (7.4-9)     |          | 547      | 7.8      | (6.9-8.7)   |          | 85       | 10.8     | (8-14.1)    |          | 45       | 9.6      | (6.4-13.5)  |          | 15               | 7.1      | (2.5-15.3)  |          |
| 2002-2006      | 762      | 8.4      | (7.6-9.3)   |          | 616      | 8.3      | (7.4-9.2)   |          | 84       | 10.3     | (7.6-13.4)  |          | 44       | 8.4      | (5.5-12.1)  |          | 19               | 7.5      | (3.1-14.7)  |          |
| 2003-2007      | 810      | 8.9      | (8.1-9.8)   |          | 656      | 8.8      | (7.9-9.7)   |          | 92       | 11.9     | (9.1-15.2)  |          | 47       | 7.2      | (4.6-10.6)  |          | 13               | 7.3      | (2.9-14.7)  |          |
| 2004-2008      | 890      | 8.9      | (8.1-9.7)   |          | 725      | 8.9      | (8-9.8)     |          | 103      | 11.4     | (8.7-14.5)  |          | 46       | 6.4      | (4.1-9.4)   |          | 13               | 5.6      | (2.2-11.4)  |          |
| 2005-2009      | 1060     | 10.2     | (9.4-11)    |          | 876      | 10.2     | (9.3-11.1)  |          | 108      | 12.6     | (9.8-15.8)  |          | 57       | 7.9      | (5.3-11.1)  |          | 20               | 7.7      | (3.7-13.7)  |          |
| 2006-2010      | 1170     | 10.9     | (10.1-11.8) |          | 952      | 10.7     | (9.8-11.6)  |          | 129      | 14.3     | (11.4-17.6) |          | 64       | 9.4      | (6.6-12.9)  |          | 24               | 12.4     | (7.3-19.1)  |          |
| 2007-2011      | 1308     | 11.7     | (10.9-12.5) |          | 1059     | 11.2     | (10.4-12.1) |          | 145      | 15.6     | (12.6-18.8) |          | 73       | 11.3     | (8.2-14.9)  |          | 30               | 13.3     | (8.1-19.9)  |          |
| 2008-2012      | 1488     | 12.7     | (11.9-13.5) |          | 1208     | 12.1     | (11.3-13)   |          | 162      | 15.9     | (13-19.1)   |          | 86       | 14.3     | (10.9-18.2) |          | 34               | 16.2     | (10.2-23.6) |          |
| 2009-2013      | 1694     | 13.4     | (12.6-14.3) |          | 1359     | 12.9     | (12-13.8)   |          | 195      | 17.6     | (14.6-20.7) |          |          |          |             | ShortFU  | 42               | 16.9     | (11-24)     |          |
| Total Change*  |          | 5.8      |             |          |          | 5.2      |             |          |          | 11.3     |             |          |          | 4.3      |             |          |                  | NC       |             |          |

| HCC     |               | UK   |          |             | England |          |             | Scotland |          |             | Wales |          |             | Northern Ireland |          |             |
|---------|---------------|------|----------|-------------|---------|----------|-------------|----------|----------|-------------|-------|----------|-------------|------------------|----------|-------------|
| Persons | Cohort        | Net  |          |             | Net     |          |             | Net      |          |             | Net   |          |             | Net              |          |             |
|         |               | N    | Survival | CI suppress | N       | Survival | CI suppress | N        | Survival | CI suppress | N     | Survival | CI suppress | N                | Survival | CI suppress |
|         | 1997-2001     | 675  | 9.4      | (8.5-10.4)  | 552     | 9.3      | (8.2-10.3)  | 80       | 10.8     | (8.1-14.1)  | 27    | 8.7      | (5.3-13.2)  |                  |          | <10         |
|         | 1998-2002     | 754  | 9.9      | (9-10.8)    | 622     | 9.7      | (8.7-10.8)  | 84       | 10.7     | (8-13.9)    | 31    | 10.2     | (6.6-14.8)  | 12               | 6.2      | (2.4-12.7)  |
|         | 1999-2003     | 847  | 10.5     | (9.6-11.4)  | 697     | 10.4     | (9.4-11.5)  | 91       | 10.2     | (7.6-13.2)  | 36    | 12       | (8.1-16.8)  | 18               | 6.6      | (2.5-13.6)  |
|         | 2000-2004     | 914  | 10.7     | (9.9-11.7)  | 740     | 10.6     | (9.6-11.6)  | 108      | 11.0     | (8.6-13.9)  | 42    | 12.3     | (8.4-17.1)  | 20               | 10.6     | (5-18.9)    |
|         | 2001-2005     | 984  | 10.6     | (9.7-11.5)  | 796     | 10.5     | (9.6-11.5)  | 121      | 10.9     | (8.5-13.7)  | 44    | 11.3     | (7.7-15.8)  | 21               | 9.7      | (4.7-17.5)  |
|         | 2002-2006     | 1123 | 11.0     | (10.2-11.9) | 911     | 11       | (10.1-12)   | 134      | 11.2     | (8.9-13.8)  | 50    | 10.6     | (7.1-14.9)  | 27               | 11.7     | (6.3-19.2)  |
|         | 2003-2007     | 1281 | 11.7     | (10.8-12.5) | 1025    | 11.5     | (10.6-12.5) | 162      | 12.7     | (10.4-15.3) | 57    | 11.3     | (7.9-15.4)  | 36               | 10.9     | (6-17.6)    |
|         | 2004-2008     | 1473 | 12.3     | (11.5-13.2) | 1169    | 12.3     | (11.4-13.2) | 206      | 13.7     | (11.4-16.3) | 68    | 10.5     | (7.5-14.1)  | 33               | 9.4      | (5.3-14.9)  |
|         | 2005-2009     | 1722 | 13.5     | (12.7-14.3) | 1357    | 13.3     | (12.4-14.3) | 243      | 16.3     | (13.9-18.9) | 88    | 13.1     | (9.9-16.8)  | 40               | 7.5      | (4.2-12.2)  |
|         | 2006-2010     | 2014 | 14.8     | (14-15.7)   | 1574    | 14.6     | (13.7-15.5) | 281      | 17.7     | (15.3-20.3) | 110   | 15.1     | (11.8-18.9) | 51               | 10.6     | (6.8-15.5)  |
|         | 2007-2011     | 2314 | 15.9     | (15.1-16.8) | 1771    | 15.4     | (14.5-16.3) | 343      | 19.8     | (17.4-22.4) | 142   | 17.3     | (14-21)     | 59               | 12.7     | (8.6-17.7)  |
|         | 2008-2012     | 2709 | 17.2     | (16.4-18)   | 2051    | 16.7     | (15.8-17.6) | 424      | 21.4     | (19-24)     | 169   | 17.2     | (14-20.7)   | 70               | 15.5     | (11.1-20.6) |
|         | 2009-2013     | 3172 | 18.3     | (17.5-19.1) | 2386    | 17.6     | (16.7-18.5) | 514      | 23.9     | (21.5-26.4) |       |          | ShortFU     | 88               | 16.5     | (12.2-21.4) |
|         | Total Change* |      | 8.9      |             |         | 8.3      |             |          | 13.1     |             |       | 8.5      |             |                  | NC       |             |
| Males   | 1997-2001     | 480  | 8.8      | (7.7-9.9)   | 392     | 8.5      | (7.3-9.7)   | 63       | 11.2     | (7.9-15.2)  | 16    | 8.3      | (4.4-14)    |                  |          | <10         |
|         | 1998-2002     | 547  | 9.4      | (8.4-10.5)  | 449     | 9.2      | (8.1-10.4)  | 67       | 11.2     | (8-15.1)    | 20    | 10       | (5.7-15.7)  |                  |          | <10         |
|         | 1999-2003     | 612  | 9.8      | (8.8-10.9)  | 504     | 9.6      | (8.5-10.7)  | 70       | 10.7     | (7.7-14.2)  | 24    | 12.3     | (7.7-18.3)  |                  |          | <10         |
|         | 2000-2004     | 667  | 10.1     | (9.1-11.1)  | 546     | 9.9      | (8.8-11.1)  | 77       | 10.1     | (7.4-13.4)  | 28    | 10.8     | (6.5-16.4)  | 11               | 10.7     | (4.5-20.6)  |
|         | 2001-2005     | 726  | 10.0     | (9.1-11)    | 593     | 10       | (9-11.1)    | 88       | 9.8      | (7.2-12.9)  | 30    | 10.3     | (6.2-15.8)  | 12               | 8.2      | (3-17.4)    |
|         | 2002-2006     | 836  | 10.6     | (9.7-11.6)  | 684     | 10.7     | (9.6-11.8)  | 96       | 10.1     | (7.6-13)    | 37    | 10.1     | (6.1-15.3)  | 17               | 9.4      | (4.1-17.9)  |
|         | 2003-2007     | 957  | 11.0     | (10.1-12)   | 768     | 10.9     | (9.9-12)    | 118      | 11.8     | (9.3-14.8)  | 44    | 11.7     | (7.7-16.8)  | 26               | 9.1      | (4.2-16.5)  |
|         | 2004-2008     | 1121 | 12.0     | (11.1-12.9) | 889     | 11.9     | (10.8-12.9) | 155      | 13.3     | (10.7-16.3) | 55    | 11.4     | (7.7-15.9)  | 24               | 7.9      | (3.7-14.4)  |
|         | 2005-2009     | 1330 | 13.2     | (12.3-14.2) | 1039    | 12.9     | (11.9-14)   | 187      | 16.3     | (13.5-19.3) | 74    | 14.7     | (10.8-19.3) | 32               | 6.4      | (2.9-11.8)  |
|         | 2006-2010     | 1566 | 14.7     | (13.8-15.7) | 1221    | 14.4     | (13.3-15.4) | 214      | 17.2     | (14.5-20.2) | 90    | 17.2     | (13.1-21.9) | 42               | 9.7      | (5.6-15.4)  |
|         | 2007-2011     | 1788 | 15.7     | (14.7-16.6) | 1355    | 14.9     | (13.9-16)   | 268      | 19.2     | (16.5-22.2) | 116   | 19.2     | (15.2-23.6) | 50               | 12.9     | (8.3-18.8)  |
|         | 2008-2012     | 2092 | 16.8     | (15.8-17.7) | 1574    | 16.2     | (15.2-17.2) | 331      | 20.7     | (17.9-23.6) | 133   | 17.1     | (13.5-21.1) | 56               | 15.3     | (10.4-21.3) |
|         | 2009-2013     | 2433 | 17.7     | (16.8-18.6) | 1824    | 17.2     | (16.2-18.2) | 397      | 22.6     | (19.9-25.4) |       |          | ShortFU     | 70               | 16.7     | (11.8-22.5) |
|         | Total Change* |      | 8.9      |             |         | 8.7      |             |          | 11.4     |             |       | 8.8      |             |                  | NC       |             |
| Females | 1997-2001     | 201  | 11.8     | (9.9-13.9)  | 164     | 11.9     | (9.8-14.3)  | 19       | 10.7     | (6-17.2)    | 11    | 8.8      | (3.4-17.5)  |                  |          | <10         |
|         | 1998-2002     | 211  | 11.4     | (9.5-13.4)  | 175     | 11.6     | (9.6-13.9)  | 19       | 9.9      | (5.3-16.3)  | 10    | 8.6      | (3.5-16.8)  |                  |          | <10         |
|         | 1999-2003     | 241  | 12.8     | (10.9-14.9) | 198     | 13.5     | (11.3-15.8) | 20       | 8.4      | (4.3-14.3)  | 12    | 10.8     | (4.8-19.5)  |                  |          | <10         |
|         | 2000-2004     | 255  | 13.4     | (11.5-15.5) | 202     | 13.3     | (11.2-15.7) | 31       | 14.0     | (8.8-20.5)  | 14    | 16.5     | (8.8-26.6)  |                  |          | <10         |
|         | 2001-2005     | 267  | 12.7     | (10.9-14.7) | 211     | 12.4     | (10.4-14.6) | 34       | 15.3     | (10-21.8)   | 14    | 13.6     | (7.2-22.4)  | 10               | 18.2     | (6.3-36.9)  |
|         | 2002-2006     | 294  | 12.6     | (10.8-14.5) | 232     | 12.2     | (10.3-14.4) | 39       | 14.9     | (9.9-20.9)  | 13    | 11.7     | (5.8-19.9)  | 11               | 19.8     | (7.6-37.9)  |
|         | 2003-2007     | 332  | 13.9     | (12.1-15.9) | 264     | 13.8     | (11.8-16)   | 46       | 16.4     | (11.4-22.4) | 13    | 11.1     | (5.5-18.9)  |                  |          | <10         |
|         | 2004-2008     | 356  | 13.6     | (11.8-15.4) | 284     | 13.9     | (12-16.1)   | 53       | 15.4     | (10.7-21)   | 14    | 9.3      | (4.6-16)    |                  |          | <10         |
|         | 2005-2009     | 398  | 14.5     | (12.8-16.3) | 322     | 14.9     | (13-17)     | 58       | 17.8     | (12.8-23.4) | 17    | 11.8     | (6.4-19)    |                  |          | <10         |
|         | 2006-2010     | 452  | 15.4     | (13.7-17.2) | 356     | 15.4     | (13.7-17.5) | 69       | 19.6     | (14.5-25.3) | 21    | 9.5      | (4.8-16.3)  |                  |          | <10         |
|         | 2007-2011     | 530  | 17.1     | (15.4-18.8) | 417     | 17       | (15.1-19)   | 78       | 22.1     | (16.9-27.8) | 27    | 11.7     | (6.5-18.6)  |                  |          | <10         |
|         | 2008-2012     | 618  | 18.8     | (17.1-20.6) | 477     | 18.5     | (16.6-20.5) | 94       | 22.9     | (17.8-28.5) | 37    | 18.3     | (11.8-26.1) | 12               | 15.3     | (7.3-26.5)  |
|         | 2009-2013     | 744  | 20.2     | (18.5-21.9) | 564     | 19.1     | (17.3-21)   | 118      | 28.1     | (22.6-33.8) |       |          | ShortFU     | 19               | 17.7     | (9.5-28.2)  |
|         | Total Change* |      | 8.4      |             |         | 7.2      |             |          | 17.4     |             |       | 9.5      |             |                  | NC       |             |

| ICCA    |               | UK       |     |           | England |          |           | Scotland |          |            | Wales |          |            | Northern Ireland |          |            |
|---------|---------------|----------|-----|-----------|---------|----------|-----------|----------|----------|------------|-------|----------|------------|------------------|----------|------------|
| Cohort  | N             | Net      |     | suppress  | N       | Net      |           | N        | Net      |            | N     | Net      |            | N                | Net      |            |
|         |               | Survival | CI  |           |         | Survival | CI        |          | Survival | CI         |       | Survival | CI         |                  | Survival | CI         |
| Persons | 1997-2001     | 464      | 4.4 | (3.8-5.1) | 367     | 4.2      | (3.5-5)   | 53       | 4.6      | (2.8-7.2)  | 46    | 9.8      | (6.3-14.2) |                  |          | <10        |
|         | 1998-2002     | 492      | 4.2 | (3.6-4.9) | 397     | 4.3      | (3.6-5)   | 53       | 3.2      | (1.7-5.4)  | 39    | 6.5      | (3.8-10.3) |                  |          | SE>0.2     |
|         | 1999-2003     | 524      | 4.7 | (4-5.4)   | 423     | 4.7      | (4-5.4)   | 55       | 3.7      | (2.1-6.1)  | 43    | 7.2      | (4.4-10.9) |                  |          | SE>0.2     |
|         | 2000-2004     | 550      | 4.8 | (4.2-5.5) | 442     | 4.9      | (4.2-5.6) | 61       | 4.5      | (2.7-6.9)  | 44    | 6.3      | (3.8-9.8)  |                  |          | SE>0.2     |
|         | 2001-2005     | 579      | 4.9 | (4.3-5.6) | 465     | 4.7      | (4.1-5.4) | 63       | 5.8      | (3.8-8.5)  | 46    | 7.2      | (4.5-10.7) |                  |          | <10        |
|         | 2002-2006     | 631      | 5.1 | (4.5-5.7) | 509     | 4.9      | (4.3-5.6) | 63       | 6.3      | (4.2-9)    | 49    | 7.6      | (4.9-11.1) |                  |          | <10        |
|         | 2003-2007     | 673      | 5.4 | (4.8-6.1) | 539     | 5.2      | (4.5-5.9) | 74       | 7.6      | (5.3-10.3) | 56    | 7.3      | (4.7-10.5) |                  |          | <10        |
|         | 2004-2008     | 732      | 5.3 | (4.7-5.9) | 588     | 5.1      | (4.5-5.8) | 83       | 7.8      | (5.6-10.6) | 57    | 5.8      | (3.7-8.6)  |                  |          | <10        |
|         | 2005-2009     | 831      | 5.7 | (5.1-6.3) | 669     | 5.4      | (4.8-6.1) | 90       | 8.1      | (5.8-10.9) | 65    | 6.9      | (4.6-9.8)  | 13               | 4.9      | (1.8-10.4) |
|         | 2006-2010     | 878      | 5.9 | (5.3-6.5) | 713     | 5.7      | (5.1-6.4) | 94       | 7.9      | (5.7-10.6) | 68    | 7.6      | (5.2-10.6) | 11               | 5        | (1.8-10.8) |
|         | 2007-2011     | 950      | 6.0 | (5.5-6.7) | 782     | 5.9      | (5.3-6.6) | 94       | 7.6      | (5.4-10.3) | 57    | 6.5      | (4.3-9.3)  | 16               | 5.7      | (2.1-12)   |
|         | 2008-2012     | 1014     | 6.0 | (5.5-6.6) | 838     | 5.8      | (5.2-6.5) | 97       | 6.7      | (4.7-9.1)  | 61    | 8        | (5.6-10.9) | 18               | 6.6      | (2.7-12.9) |
|         | 2009-2013     | 1088     | 6.1 | (5.6-6.7) | 890     | 6        | (5.4-6.7) | 108      | 5.2      | (3.6-7.2)  |       |          | ShortFU    | 21               | 7.8      | (3.6-14.2) |
|         | Total Change* |          | 1.7 |           |         | 1.8      |           |          | 0.6      |            |       | -1.8     |            |                  | NC       |            |
| Males   | 1997-2001     | 205      | 4.3 | (3.4-5.4) | 169     | 3.9      | (3-5)     | 21       | 7.5      | (3.9-12.8) | 13    | 8        | (3.4-15.4) |                  |          | Insuff     |
|         | 1998-2002     | 209      | 3.9 | (3.1-4.9) | 176     | 3.7      | (2.8-4.8) | 18       | 4.8      | (2-9.5)    | 15    | 8.6      | (3.9-15.8) |                  |          | Insuff     |
|         | 1999-2003     | 230      | 4.2 | (3.4-5.3) | 196     | 4.1      | (3.2-5.2) | 16       | 3.2      | (1.1-7.4)  | 17    | 8.5      | (4.1-15.2) |                  |          | Insuff     |
|         | 2000-2004     | 247      | 4.5 | (3.6-5.5) | 210     | 4.5      | (3.5-5.6) | 17       | 2.1      | (0.6-5.6)  | 19    | 8.5      | (4.2-14.9) |                  |          | Insuff     |
|         | 2001-2005     | 263      | 4.5 | (3.6-5.4) | 218     | 4.2      | (3.3-5.2) | 21       | 2.6      | (0.9-6.2)  | 22    | 10.2     | (5.5-16.9) |                  |          | Insuff     |
|         | 2002-2006     | 288      | 4.9 | (4-5.9)   | 236     | 4.6      | (3.7-5.6) | 28       | 5.1      | (2.5-9)    | 22    | 11       | (6.2-17.6) |                  |          | <10        |
|         | 2003-2007     | 322      | 5.6 | (4.7-6.6) | 261     | 5.3      | (4.3-6.3) | 34       | 5.8      | (3.1-9.7)  | 25    | 11.8     | (7-18.1)   |                  |          | <10        |
|         | 2004-2008     | 353      | 5.7 | (4.8-6.7) | 287     | 5.5      | (4.5-6.5) | 39       | 6.9      | (3.9-11.1) | 29    | 9.1      | (5.2-14.5) |                  |          | <10        |
|         | 2005-2009     | 386      | 5.8 | (4.9-6.8) | 309     | 5.5      | (4.6-6.5) | 45       | 7.2      | (4.2-11.5) | 30    | 9        | (5.3-14.1) |                  |          | <10        |
|         | 2006-2010     | 415      | 6.2 | (5.3-7.2) | 343     | 6.2      | (5.2-7.2) | 42       | 6.2      | (3.5-10.1) | 35    | 10       | (6.1-15.2) |                  |          | <10        |
|         | 2007-2011     | 443      | 6.3 | (5.4-7.2) | 375     | 6.5      | (5.6-7.5) | 37       | 4.7      | (2.3-8.4)  | 26    | 4.5      | (2.1-8.5)  |                  |          | <10        |
|         | 2008-2012     | 461      | 6.0 | (5.2-6.9) | 384     | 6.1      | (5.2-7.1) | 42       | 4.5      | (2.3-7.9)  | 28    | 8.7      | (5.3-13.4) |                  |          | <10        |
|         | 2009-2013     | 500      | 6.3 | (5.5-7.2) | 416     | 6.4      | (5.5-7.4) | 47       | 3.7      | (1.9-6.7)  |       |          | ShortFU    |                  |          | <10        |
|         | Total Change* |          | 2.0 |           |         | 2.5      |           |          | -3.8     |            |       | 0.7      |            |                  | NC       |            |
| Females | 1997-2001     | 269      | 5.0 | (4.1-6)   | 204     | 5.2      | (4.2-6.4) | 33       | 2.6      | (1.1-5.4)  | 32    | 11.3     | (6.6-17.6) |                  |          | <10        |
|         | 1998-2002     | 290      | 4.7 | (3.9-5.7) | 225     | 5.2      | (4.2-6.4) | 38       | 2.4      | (1-5.1)    | 24    | 5.1      | (2.2-9.8)  |                  |          | SE>0.2     |
|         | 1999-2003     | 303      | 5.4 | (4.5-6.4) | 231     | 5.6      | (4.6-6.8) | 40       | 4.4      | (2.2-7.7)  | 25    | 4.5      | (1.9-8.9)  |                  |          | <10        |
|         | 2000-2004     | 307      | 5.3 | (4.4-6.3) | 232     | 5.4      | (4.5-6.5) | 47       | 6.5      | (3.8-10.1) | 23    | 3.4      | (1.3-7.3)  |                  |          | <10        |
|         | 2001-2005     | 320      | 5.4 | (4.6-6.4) | 248     | 5.3      | (4.4-6.4) | 46       | 9.0      | (5.8-13.2) | 21    | 3.2      | (1.2-6.8)  |                  |          | <10        |
|         | 2002-2006     | 344      | 5.3 | (4.5-6.2) | 273     | 5.3      | (4.4-6.3) | 38       | 8.5      | (5.3-12.7) | 25    | 4.2      | (1.9-8.1)  |                  |          | <10        |
|         | 2003-2007     | 349      | 5.2 | (4.4-6.1) | 276     | 5.1      | (4.2-6)   | 40       | 9.3      | (6-13.5)   | 27    | 2.8      | (1.1-6.1)  |                  |          | <10        |
|         | 2004-2008     | 377      | 4.9 | (4.1-5.7) | 299     | 4.7      | (3.9-5.6) | 43       | 8.2      | (5.2-12.1) | 27    | 2.9      | (1.2-6)    |                  |          | <10        |
|         | 2005-2009     | 449      | 5.6 | (4.8-6.4) | 361     | 5.3      | (4.5-6.3) | 45       | 8.9      | (5.8-12.9) | 36    | 5.2      | (2.7-8.8)  |                  |          | <10        |
|         | 2006-2010     | 464      | 5.6 | (4.8-6.4) | 367     | 5.2      | (4.4-6.1) | 52       | 9.1      | (5.9-13.1) | 35    | 6        | (3.3-9.9)  |                  |          | <10        |
|         | 2007-2011     | 507      | 5.8 | (5-6.6)   | 405     | 5.3      | (4.5-6.1) | 58       | 9.7      | (6.5-13.6) | 35    | 8.9      | (5.5-13.3) | 12               | 4.3      | (0.7-13.5) |
|         | 2008-2012     | 558      | 6.1 | (5.3-6.9) | 456     | 5.6      | (4.8-6.5) | 55       | 8.6      | (5.8-12.2) | 36    | 8.9      | (5.6-13.2) | 11               | 4.2      | (0.6-14.2) |
|         | 2009-2013     | 594      | 6.0 | (5.2-6.8) | 477     | 5.7      | (4.9-6.6) | 60       | 6.3      | (4-9.3)    |       |          | ShortFU    | 13               | 7.7      | (2.1-18.6) |
|         | Total Change* |          | 1.0 |           |         | 0.5      |           |          | 3.7      |            |       | -2.4     |            |                  | NC       |            |

| Other   |               | UK  |          |             |     | England |             |          |    | Scotland |     |          |             | Wales   |   |          |          | Northern Ireland |            |   |          |
|---------|---------------|-----|----------|-------------|-----|---------|-------------|----------|----|----------|-----|----------|-------------|---------|---|----------|----------|------------------|------------|---|----------|
| Persons | Cohort        | Net |          | suppress    | Net |         | suppress    | Net      |    | suppress | Net |          | suppress    | Net     |   | suppress | Net      |                  | suppress   |   |          |
|         |               | N   | Survival |             | CI  | N       |             | Survival | CI |          | N   | Survival |             | CI      | N |          | Survival | CI               |            | N | Survival |
|         | 1997-2001     | 128 | 5.6      | (4.5-7)     | 111 | 5.3     | (4.2-6.8)   | <10      |    |          | 10  | 9.7      |             |         |   |          |          |                  | SE>0.2     |   |          |
|         | 1998-2002     | 138 | 6.4      | (5.1-7.8)   | 118 | 5.8     | (4.5-7.3)   | <10      |    |          | 13  | 14.2     |             |         |   |          |          |                  | Insuff     |   |          |
|         | 1999-2003     | 147 | 6.8      | (5.5-8.3)   | 123 | 6       | (4.7-7.5)   | <10      |    |          | 17  | 17.9     |             |         |   |          |          |                  | Insuff     |   |          |
|         | 2000-2004     | 138 | 6.3      | (5-7.8)     | 113 | 5.3     | (4-6.8)     | <10      |    |          | 16  | 20       |             |         |   |          |          |                  | <10        |   |          |
|         | 2001-2005     | 156 | 7.2      | (5.8-8.9)   | 132 | 6.4     | (5-8.1)     | <10      |    |          | 13  | 17.3     |             |         |   |          |          |                  | <10        |   |          |
|         | 2002-2006     | 185 | 9.3      | (7.7-11.1)  | 164 | 9.1     | (7.4-11)    | <10      |    |          |     |          | <10         |         |   |          |          |                  | Insuff     |   |          |
|         | 2003-2007     | 202 | 10.0     | (8.4-11.8)  | 183 | 10.2    | (8.4-12.2)  | <10      |    |          |     |          | <10         |         |   |          |          |                  | Insuff     |   |          |
|         | 2004-2008     | 255 | 10.7     | (9.1-12.5)  | 239 | 11.2    | (9.5-13.2)  | <10      |    |          |     |          | <10         |         |   |          |          |                  | Insuff     |   |          |
|         | 2005-2009     | 353 | 13.9     | (12.2-15.8) | 332 | 14.4    | (12.6-16.4) | <10      |    |          |     |          | <10         |         |   |          |          |                  | Insuff     |   |          |
|         | 2006-2010     | 439 | 16.0     | (14.2-17.8) | 413 | 16.5    | (14.6-18.4) | <10      |    |          |     |          | <10         |         |   |          |          |                  | <10        |   |          |
|         | 2007-2011     | 475 | 15.4     | (13.7-17.2) | 437 | 15.8    | (14-17.7)   | <10      |    |          | 15  | 23.6     |             |         |   |          | 13       | 17.4             | (8.8-28.8) |   |          |
|         | 2008-2012     | 544 | 15.7     | (14.2-17.4) | 503 | 16.1    | (14.4-17.8) | SE>0.2   |    |          | 19  | 23.3     |             |         |   |          | 13       | 17.9             | (9.1-29.5) |   |          |
|         | 2009-2013     | 651 | 17.3     | (15.8-19)   | 607 | 17.7    | (16-19.4)   | <10      |    |          |     |          |             | ShortFU |   |          | 13       | 19.2             | (10-31)    |   |          |
|         | Total Change* |     | 11.7     |             |     | 12.4    |             | NC       |    |          |     | NC       |             |         |   |          | NC       |                  |            |   |          |
| Males   | 1997-2001     | 60  | 4.9      | (3.6-6.6)   | 51  | 4.4     | (3.1-6.2)   | <10      |    |          |     |          | <10         |         |   |          |          |                  | Insuff     |   |          |
|         | 1998-2002     | 66  | 5.9      | (4.3-7.7)   | 54  | 5       | (3.5-6.9)   | <10      |    |          |     |          | <10         |         |   |          |          |                  | Insuff     |   |          |
|         | 1999-2003     | 68  | 6.4      | (4.8-8.3)   | 53  | 5.2     | (3.7-7.1)   | <10      |    |          | 13  | 21.6     | (11.5-34.4) |         |   |          |          |                  | Insuff     |   |          |
|         | 2000-2004     | 66  | 6.3      | (4.6-8.3)   | 52  | 5       | (3.5-7)     | <10      |    |          | 11  | 22.4     | (11.2-37.1) |         |   |          |          |                  | Insuff     |   |          |
|         | 2001-2005     | 73  | 7.0      | (5.2-9.1)   | 61  | 6.2     | (4.4-8.4)   | <10      |    |          |     |          | <10         |         |   |          |          |                  | <10        |   |          |
|         | 2002-2006     | 88  | 8.7      | (6.7-11.1)  | 77  | 8.4     | (6.2-11)    | <10      |    |          |     |          | <10         |         |   |          |          |                  | Insuff     |   |          |
|         | 2003-2007     | 103 | 9.5      | (7.4-11.9)  | 94  | 9.6     | (7.3-12.2)  | Insuff   |    |          |     |          | <10         |         |   |          |          |                  | Insuff     |   |          |
|         | 2004-2008     | 132 | 9.5      | (7.5-11.8)  | 125 | 10      | (7.8-12.5)  | Insuff   |    |          |     |          | <10         |         |   |          |          |                  | Insuff     |   |          |
|         | 2005-2009     | 172 | 11.5     | (9.4-13.9)  | 163 | 12      | (9.7-14.6)  | Insuff   |    |          |     |          | <10         |         |   |          |          |                  | Insuff     |   |          |
|         | 2006-2010     | 227 | 14.0     | (11.8-16.4) | 218 | 14.9    | (12.5-17.4) | Insuff   |    |          |     |          | Insuff      |         |   |          |          |                  | <10        |   |          |
|         | 2007-2011     | 248 | 12.9     | (10.9-15.1) | 235 | 13.7    | (11.5-16.1) | SE>0.2   |    |          |     |          | Insuff      |         |   |          |          |                  | <10        |   |          |
|         | 2008-2012     | 292 | 13.8     | (11.8-15.9) | 275 | 14.6    | (12.5-16.9) | SE>0.2   |    |          |     |          | Insuff      |         |   |          |          |                  | <10        |   |          |
|         | 2009-2013     | 362 | 16.0     | (14-18.1)   | 342 | 16.8    | (14.7-19.1) | SE>0.2   |    |          |     |          | Insuff      |         |   |          |          |                  | <10        |   |          |
|         | Total Change* |     | 11.1     |             |     | 12.4    |             | NC       |    |          |     | NC       |             |         |   |          | NC       |                  |            |   |          |
| Females | 1997-2001     | 72  | 6.7      | (4.8-9)     | 65  | 6.9     | (4.8-9.4)   | <10      |    |          |     |          | <10         |         |   |          |          |                  | Insuff     |   |          |
|         | 1998-2002     | 76  | 7.0      | (5-9.4)     | 69  | 6.9     | (4.8-9.5)   | <10      |    |          |     |          | <10         |         |   |          |          |                  | Insuff     |   |          |
|         | 1999-2003     | 83  | 7.4      | (5.4-9.9)   | 73  | 6.9     | (4.8-9.4)   | <10      |    |          |     |          | <10         |         |   |          |          |                  | Insuff     |   |          |
|         | 2000-2004     | 74  | 6.1      | (4.2-8.4)   | 64  | 5.6     | (3.7-8)     | <10      |    |          |     |          | Insuff      |         |   |          |          |                  | Insuff     |   |          |
|         | 2001-2005     | 83  | 7.4      | (5.4-10)    | 71  | 6.6     | (4.6-9.3)   | <10      |    |          |     |          | Insuff      |         |   |          |          |                  | Insuff     |   |          |
|         | 2002-2006     | 97  | 10.1     | (7.6-12.9)  | 87  | 10.1    | (7.5-13.1)  | <10      |    |          |     |          | Insuff      |         |   |          |          |                  | Insuff     |   |          |
|         | 2003-2007     | 99  | 11.2     | (8.7-14.1)  | 91  | 11.7    | (8.9-14.9)  | SE>0.2   |    |          |     |          | Insuff      |         |   |          |          |                  | Insuff     |   |          |
|         | 2004-2008     | 124 | 12.6     | (10-15.5)   | 115 | 13.3    | (10.4-16.4) | SE>0.2   |    |          |     |          | Insuff      |         |   |          |          |                  | Insuff     |   |          |
|         | 2005-2009     | 184 | 17.9     | (15-21)     | 171 | 18.4    | (15.3-21.7) | <10      |    |          |     |          | Insuff      |         |   |          |          |                  | Insuff     |   |          |
|         | 2006-2010     | 217 | 19.5     | (16.6-22.5) | 199 | 19.5    | (16.5-22.7) | Insuff   |    |          |     |          | <10         |         |   |          |          |                  | Insuff     |   |          |
|         | 2007-2011     | 230 | 19.5     | (16.7-22.5) | 204 | 19.2    | (16.3-22.4) | Insuff   |    |          | 10  | 30.5     | (14.9-48.7) |         |   |          |          |                  | Insuff     |   |          |
|         | 2008-2012     | 254 | 18.8     | (16.2-21.5) | 229 | 18.3    | (15.6-21.1) | Insuff   |    |          | 11  | 35.9     | (18.3-55.5) |         |   |          |          |                  | <10        |   |          |
|         | 2009-2013     | 287 | 19.1     | (16.7-21.7) | 262 | 18.7    | (16.2-21.4) | Insuff   |    |          |     |          |             | Insuff  |   |          |          |                  | <10        |   |          |
|         | Total Change* |     | 12.4     |             |     | 11.8    |             | NC       |    |          |     | NC       |             |         |   |          | NC       |                  |            |   |          |

\*Between 1997-2001 and 2009-2013 (2008-2012 for Wales). Suppressed results: Insuff, no deaths or data in at least one age band; <10, less than 10 cases in total; SE>0.2, standard error greater than 0.2; 2yr>1yr, NC: Not Calculatable

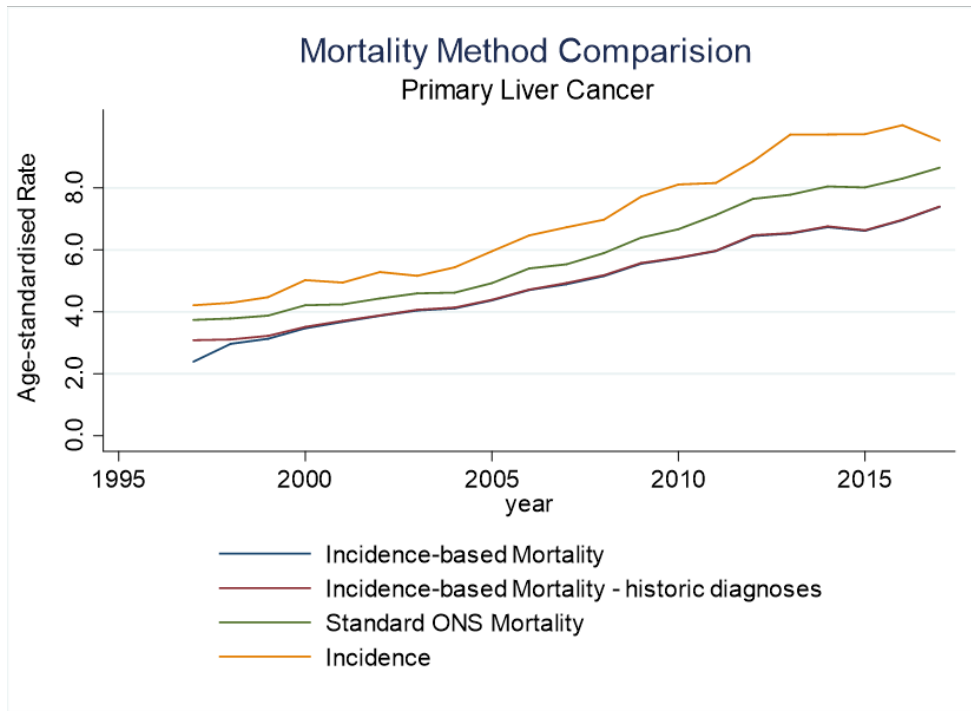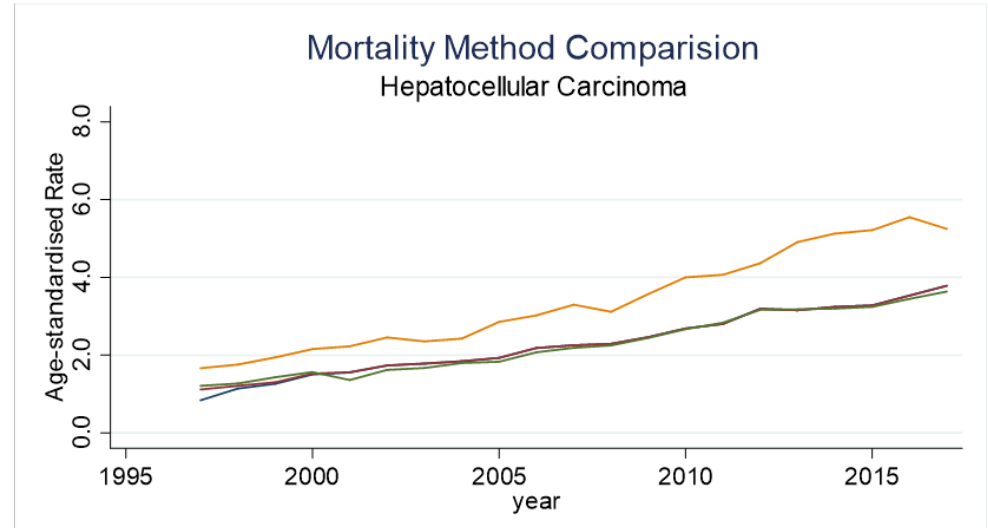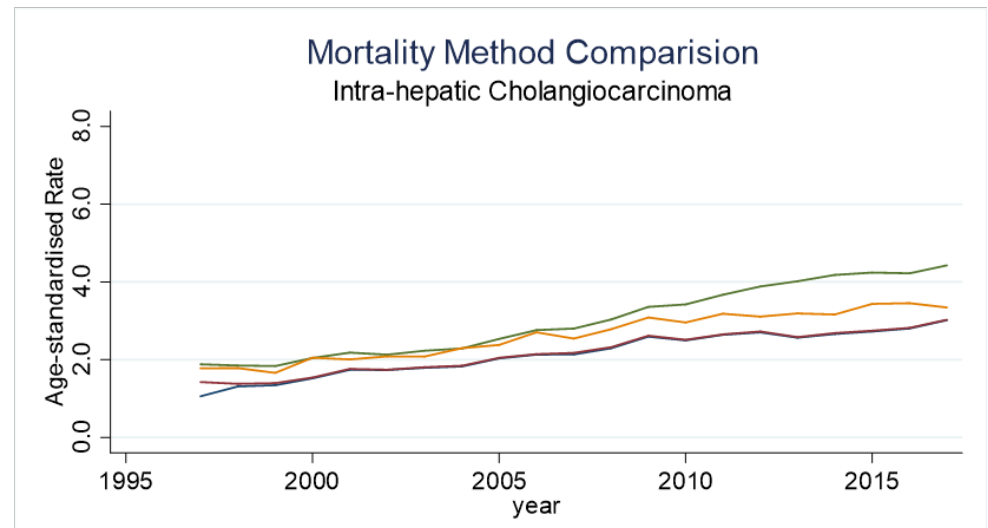

Fig. S1: Sensitivity analysis: standard mortality vs incidence-based mortality in English data

Note: Historic diagnoses are diagnoses pre-1997



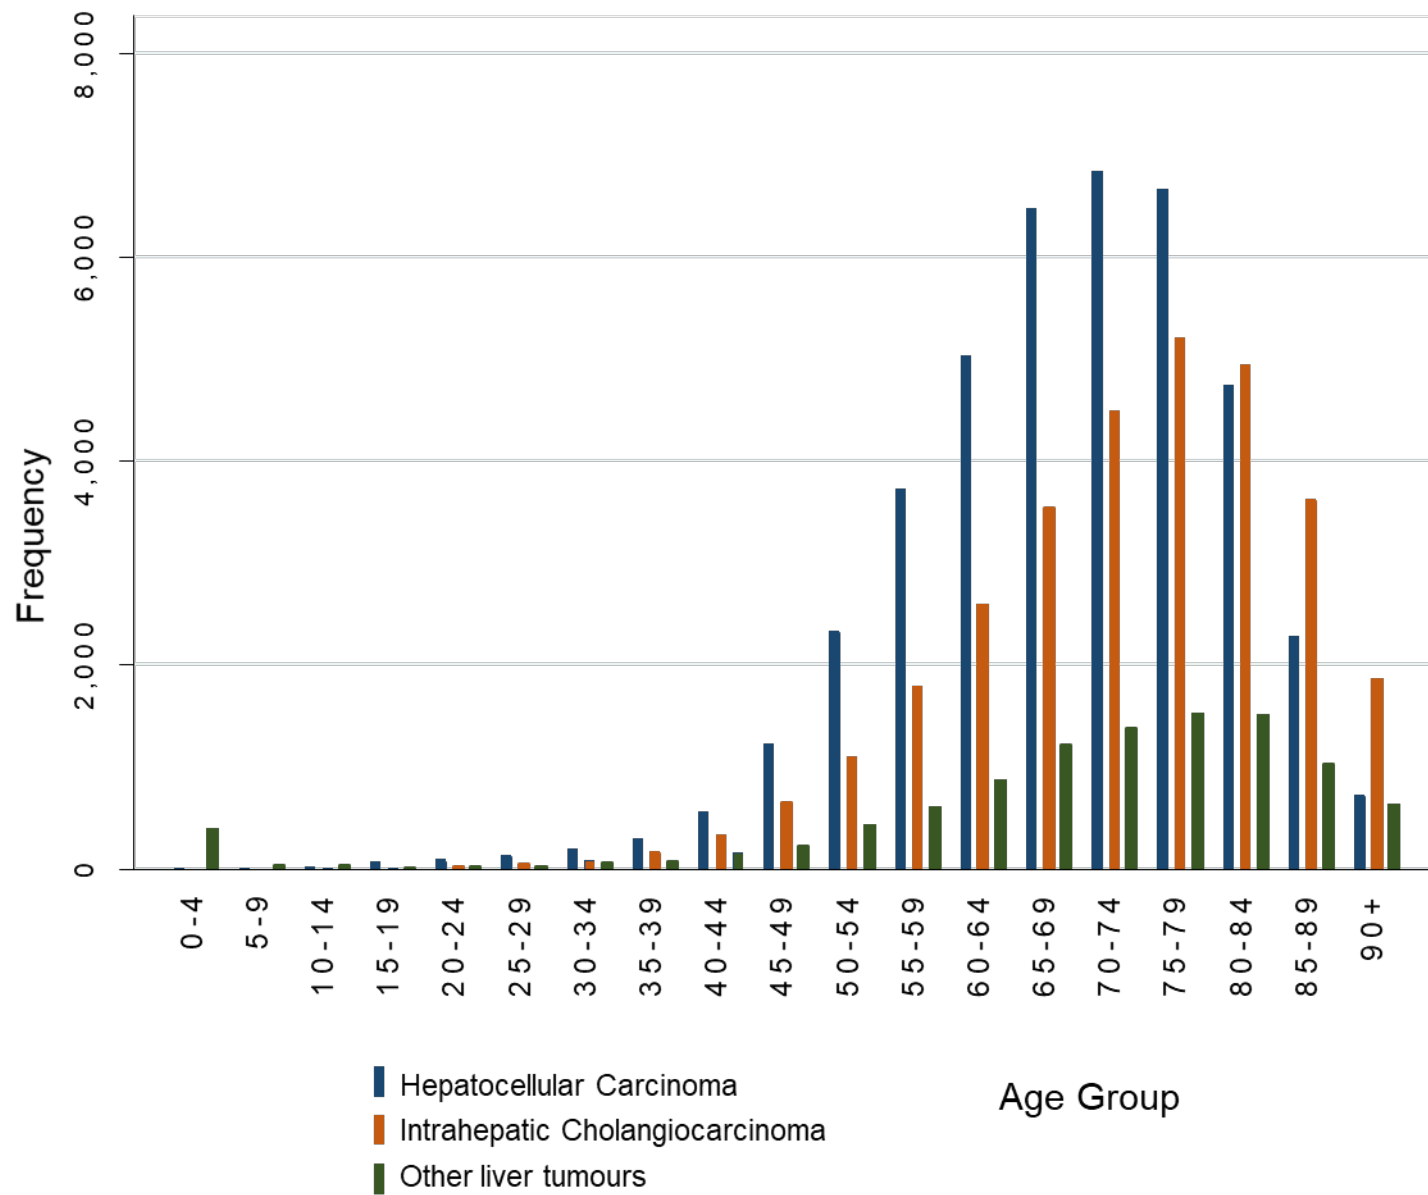

Fig. S2: Age distribution by subtype

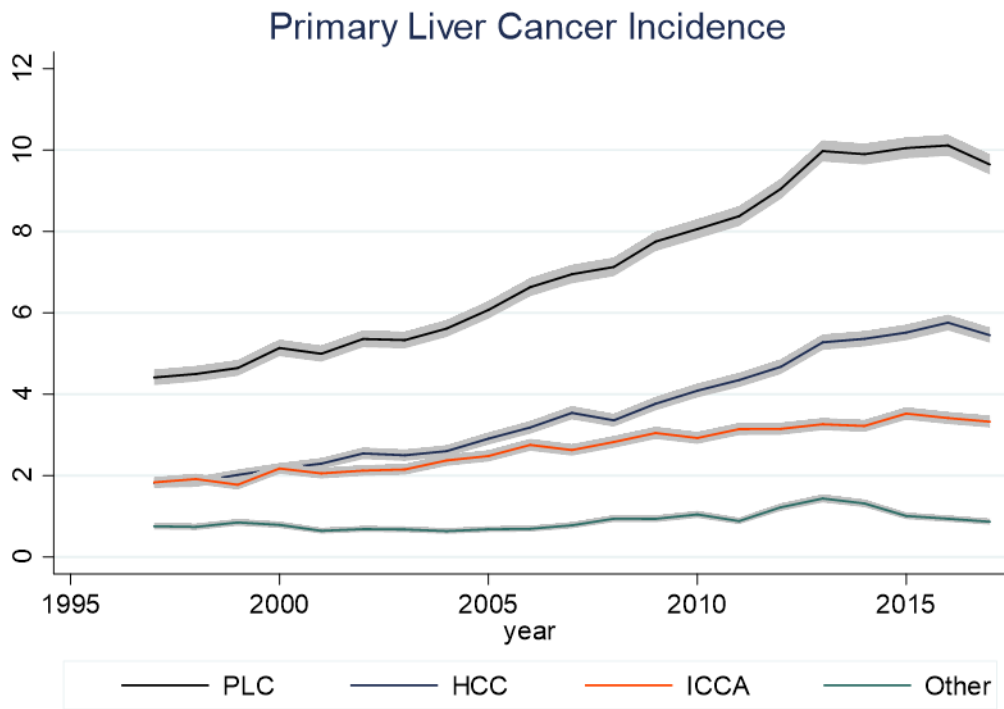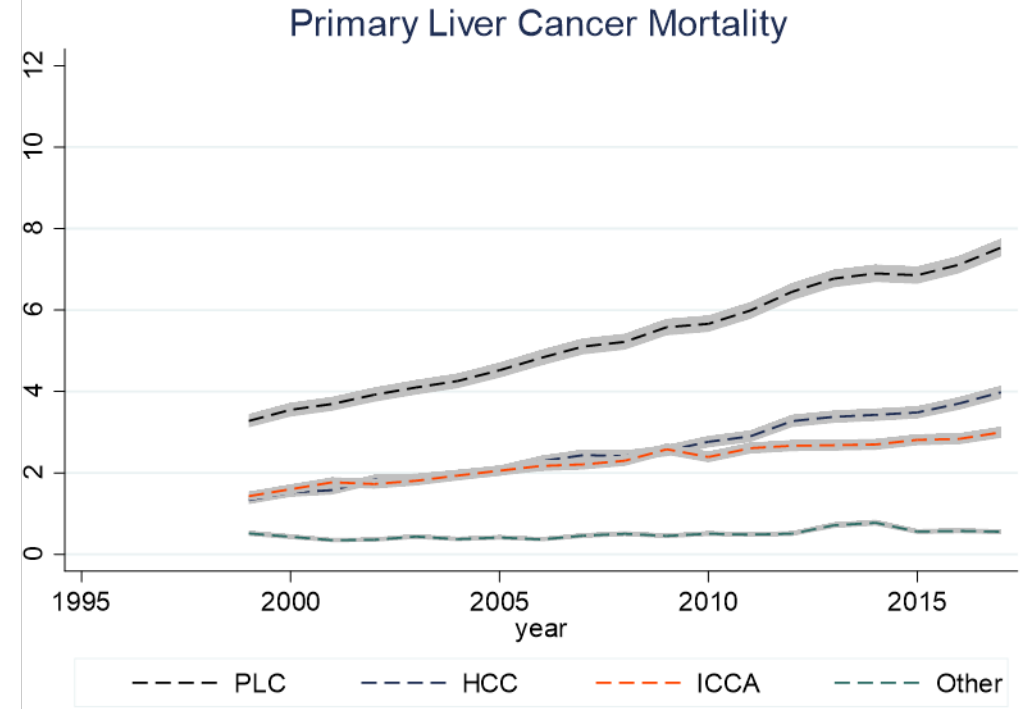

Fig. S3: Primary liver cancer age-standardised incidence and incidence-based mortality (1997-2017)

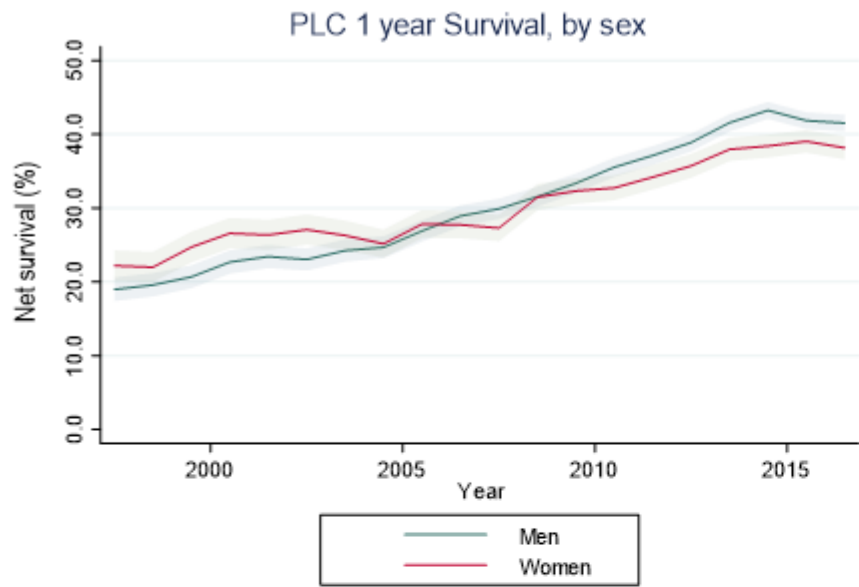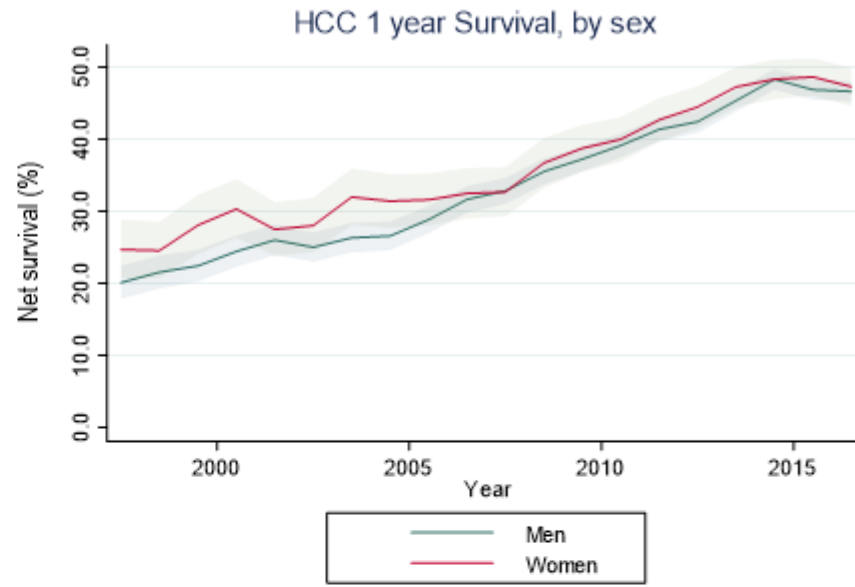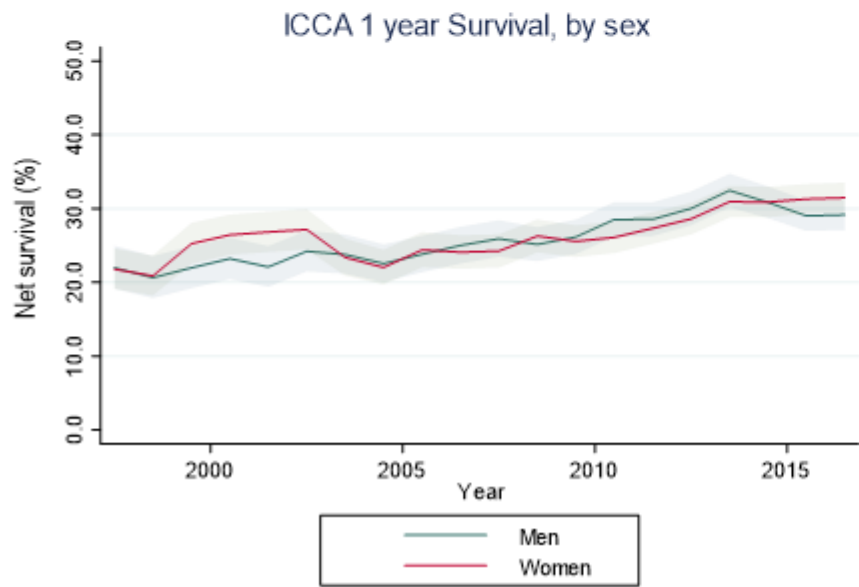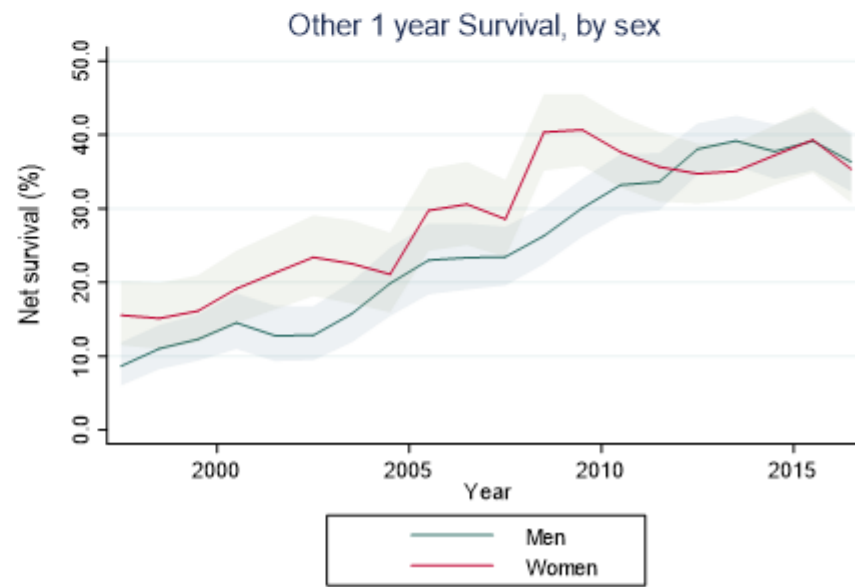

Fig. S4: Net-survival by sex and subtype

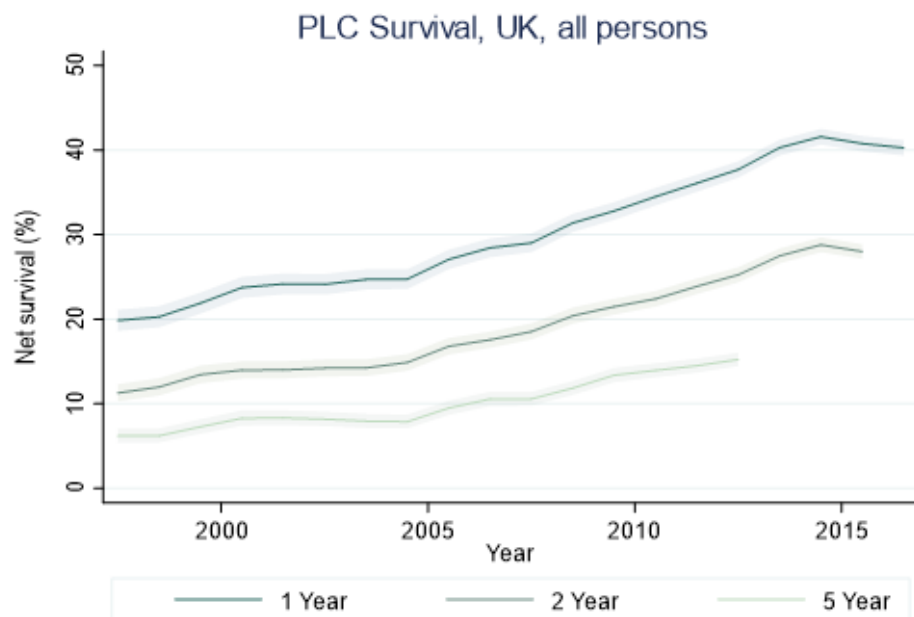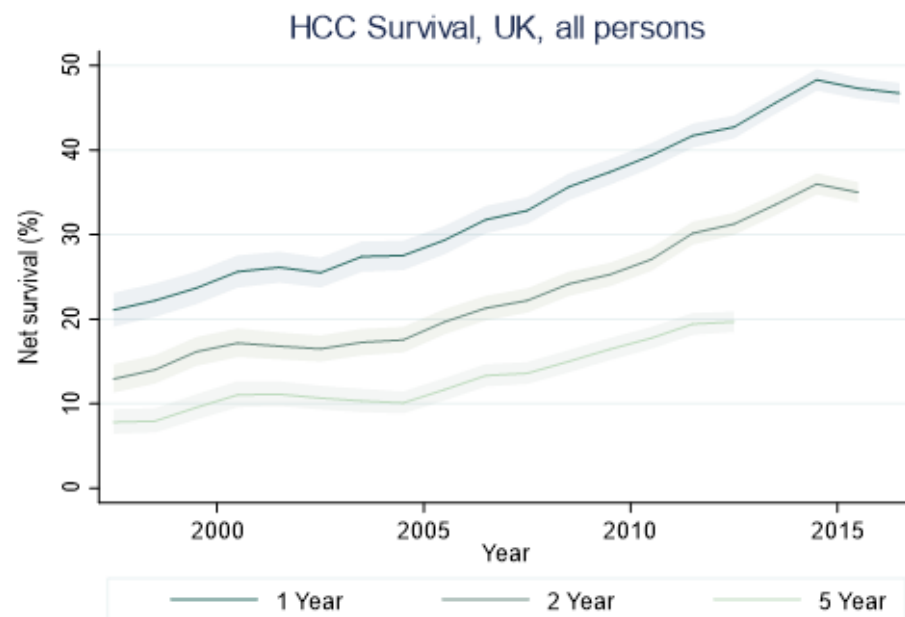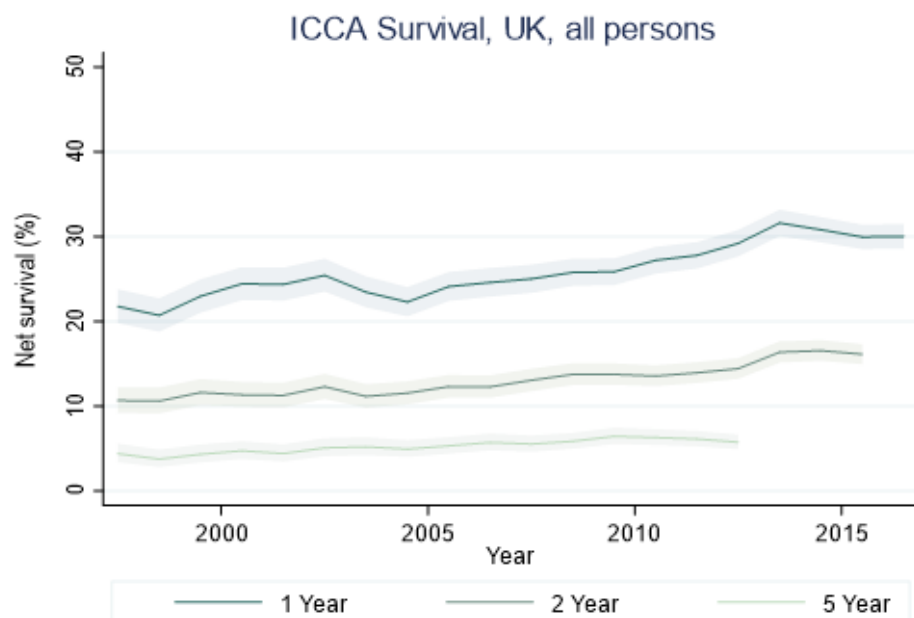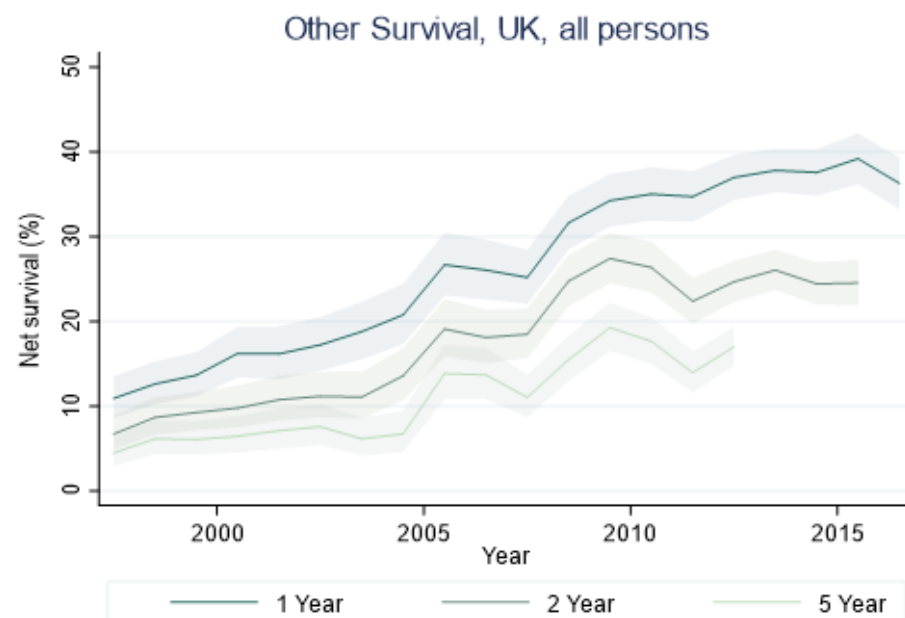

Fig. S5: Net-survival by subtype
